# Supplementary material for: Eight Indole Alkaloids from the Roots of Maerua siamensis and Their Nitric Oxide Inhibitory Effects
Source: MDPI journal article supplement (doi:10.3390/molecules27217558), 2022-11-04
Supplement: s1 [file s1]

## **Supplementary materials A: Structure elucidation and NO inhibition**

### **Eight indole alkaloids from the roots of *Maerua siamensis* and their nitric oxide inhibitory effects**

**Sasiwimon Nukulkit<sup>1,2</sup>, Angkana Jantimaporn<sup>3</sup>, Preeyaporn Poldorn<sup>4</sup>, Mattaka Khongkow<sup>3</sup>, Thanyada Rungrotmongkol<sup>4,5</sup>**

**Hsun-Shuo Chang<sup>6</sup>, Rutt Suttisri<sup>1</sup>, Chaisak Chansrinियom<sup>1,2,\*</sup>**

<sup>1</sup> Department of Pharmacognosy and Pharmaceutical Botany, Faculty of Pharmaceutical Sciences, Chulalongkorn University, Bangkok 10330, Thailand

<sup>2</sup> Natural Products and Nanoparticles Research Unit, Chulalongkorn University, Bangkok 10330, Thailand.

<sup>3</sup> National Nanotechnology Center (NANOTEC), National Science and Technology Development Agency, Pathum Thani 12120, Thailand.

<sup>4</sup> Center of Excellence in Biocatalyst and Sustainable Biotechnology, Department of Biochemistry, Faculty of Science, Chulalongkorn University, Bangkok 10330, Thailand.

<sup>5</sup> Program in Bioinformatics and Computational Biology, Graduate School, Chulalongkorn University, Bangkok 10330, Thailand.

<sup>6</sup> School of Pharmacy, College of Pharmacy, Kaohsiung Medical University, Kaohsiung 807, Taiwan.

\* Correspondence: chaisak.ch@chula.ac.th; Tel.: +66-2218-8347

# List of Contents

| Contents                                                                                                          | Page |
|-------------------------------------------------------------------------------------------------------------------|------|
| Compound <b>1</b>                                                                                                 |      |
| Figure S1. The HR-ESI-MS spectrum of compound <b>1</b>                                                            | 1    |
| Figure S2. The UV spectrum of compound <b>1</b>                                                                   | 2    |
| Figure S3. The IR spectrum of compound <b>1</b> (ATR)                                                             | 3    |
| Figure S4. The CD spectrum in MeOH of compound <b>1</b>                                                           | 4    |
| Figure S5. The $^{13}\text{C}$ -NMR, DEPT 135 and DEPT 90 (150 MHz, acetone- $d_6$ ) spectra of compound <b>1</b> | 5    |
| Figure S6. The $^1\text{H}$ NMR (600 MHz, acetone- $d_6$ ) spectrum of compound <b>1</b>                          | 6    |
| Figure S7. The $^{13}\text{C}$ NMR (150 MHz, acetone- $d_6$ ) spectrum of compound <b>1</b>                       | 7    |
| Figure S8. The HSQC spectrum of compound <b>1</b>                                                                 | 8    |
| Figure S9. The HMBC spectrum of compound <b>1</b>                                                                 | 9    |
| Figure S10. The $^1\text{H}$ - $^1\text{H}$ COSY spectrum of compound <b>1</b>                                    | 10   |
| Figure S11. The NOESY spectrum of compound <b>1</b>                                                               | 11   |
| Compound <b>2</b>                                                                                                 |      |
| Figure S12. The HR-ESI-MS spectrum of compound <b>2</b>                                                           | 12   |
| Figure S13. The UV spectrum of compound <b>2</b>                                                                  | 13   |

|                                                                                                                            |    |
|----------------------------------------------------------------------------------------------------------------------------|----|
| Figure S14. The IR spectrum of compound <b>2</b> (ATR)                                                                     | 14 |
| Figure S15. The $^{13}\text{C}$ -NMR, DEPT 135 and DEPT 90 (150 MHz, $\text{CD}_3\text{OD}$ ) spectra of compound <b>2</b> | 15 |
| Figure S16. The $^1\text{H}$ NMR (600 MHz, $\text{CD}_3\text{OD}$ ) spectrum of compound <b>2</b>                          | 16 |
| Figure S17. The $^{13}\text{C}$ NMR (150 MHz, $\text{CD}_3\text{OD}$ ) spectrum of compound <b>2</b>                       | 17 |
| Figure S18. The $^{13}\text{C}$ NMR (150 MHz, $\text{CD}_3\text{OD}$ ) spectrum of compound <b>2</b> ( <b>continued</b> )  | 18 |
| Figure S19. The HSQC spectrum of compound <b>2</b>                                                                         | 19 |
| Figure S20. The HMBC spectrum of compound <b>2</b>                                                                         | 20 |
| Figure S21. The HMBC spectrum of compound <b>2</b> ( <b>continued</b> )                                                    | 21 |
| Figure S22. The $^1\text{H}$ - $^1\text{H}$ COSY spectrum of compound <b>2</b>                                             | 22 |
| Figure S23. The NOESY spectrum of compound <b>2</b>                                                                        | 23 |
| Compound <b>3</b>                                                                                                          |    |
| Figure S24. The HR-ESI-MS spectrum of compound <b>3</b>                                                                    | 24 |
| Figure S25. The UV spectrum of compound <b>3</b>                                                                           | 25 |
| Figure S26. The IR spectrum of compound <b>3</b> (ATR)                                                                     | 26 |
| Figure S27. The $^{13}\text{C}$ -NMR, DEPT 135 and DEPT 90 (100 MHz, $\text{DMSO}-d_6$ ) spectra of compound <b>3</b>      | 27 |
| Figure S28. The $^1\text{H}$ NMR (400 MHz, $\text{DMSO}-d_6$ ) spectrum of compound <b>3</b>                               | 28 |
| Figure S29. The $^{13}\text{C}$ NMR (100 MH, $\text{DMSO}-d_6$ ) spectrum of compound <b>3</b>                             | 29 |

|                                                                                                 |    |
|-------------------------------------------------------------------------------------------------|----|
| Figure S30. The HSQC spectrum of compound <b>3</b>                                              | 30 |
| Figure S31. The HMBC spectrum of compound <b>3</b>                                              | 31 |
| Figure S32. The HMBC spectrum of compound <b>3 (continued)</b>                                  | 32 |
| Figure S33. The $^1\text{H}$ - $^1\text{H}$ COSY spectrum of compound <b>3</b>                  | 33 |
| Figure S34. The NOESY spectrum of compound <b>3</b>                                             | 34 |
| Figure S35. The NOESY spectrum of compound <b>3 (continued)</b>                                 | 35 |
| Compound <b>4</b>                                                                               |    |
| Figure S36. The HR-ESI-MS spectrum of compound <b>4</b>                                         | 36 |
| Figure S37. The UV spectrum of compound <b>4</b>                                                | 37 |
| Figure S38. The IR spectrum of compound <b>4</b> (ATR)                                          | 38 |
| Figure S39. The $^1\text{H}$ NMR (400 MHz, $\text{DMSO-}d_6$ ) spectrum of compound <b>4</b>    | 39 |
| Figure S40. The $^{13}\text{C}$ NMR (100 MHz, $\text{DMSO-}d_6$ ) spectrum of compound <b>4</b> | 40 |
| Figure S41. The HSQC spectrum of compound <b>4</b>                                              | 41 |
| Figure S42. The HMBC spectrum of compound <b>4</b>                                              | 42 |
| Figure S43. The HMBC spectrum of compound <b>4 (continued)</b>                                  | 43 |
| Figure S44. The $^1\text{H}$ - $^1\text{H}$ COSY spectrum of compound <b>4</b>                  | 44 |
| Figure S45. The NOESY spectrum of compound <b>4</b>                                             | 45 |



|                                                                                                                   |    |
|-------------------------------------------------------------------------------------------------------------------|----|
| Figure S46. The NOESY spectrum of compound <b>4</b> ( <b>continued</b> )                                          | 46 |
| Compound <b>5</b>                                                                                                 |    |
| Figure S47. The HR-ESI-MS spectrum of compound <b>5</b>                                                           | 47 |
| Figure S48. The UV spectrum of compound <b>5</b>                                                                  | 48 |
| Figure S49. The IR spectrum of compound <b>5</b> (ATR)                                                            | 49 |
| Figure S50. The $^1\text{H}$ NMR (400 MHz, $\text{DMSO-}d_6$ ) spectrum of compound <b>5</b>                      | 50 |
| Figure S51. The $^{13}\text{C}$ NMR (100 MHz, $\text{DMSO-}d_6$ ) spectrum of compound <b>5</b>                   | 51 |
| Figure S52. The HSQC spectrum of compound <b>5</b>                                                                | 52 |
| Figure S53. The HMBC spectrum of compound <b>5</b>                                                                | 53 |
| Figure S54. The $^1\text{H}$ - $^1\text{H}$ COSY spectrum of compound <b>5</b>                                    | 54 |
| Figure S55. The NOESY spectrum of compound <b>5</b>                                                               | 55 |
| Compound <b>6</b>                                                                                                 |    |
| Figure S56. The HR-ESI-MS spectrum of compound <b>6</b>                                                           | 56 |
| Figure S57. The UV spectrum of compound <b>6</b>                                                                  | 57 |
| Figure S58. The IR spectrum of compound <b>6</b> (ATR)                                                            | 58 |
| Figure S59. The $^1\text{H}$ NMR (400 MHz, $\text{DMSO-}d_6$ ) spectrum of compound <b>6</b>                      | 59 |
| Figure S60. The $^1\text{H}$ NMR (400 MHz, $\text{DMSO-}d_6$ ) spectrum of compound <b>6</b> ( <b>continued</b> ) | 60 |

|                                                                                                                        |    |
|------------------------------------------------------------------------------------------------------------------------|----|
| Figure S61. The $^{13}\text{C}$ NMR (100 MHz, $\text{DMSO-}d_6$ ) spectrum of compound <b>6</b>                        | 61 |
| Figure S62. The $^{13}\text{C}$ NMR (100 MHz, $\text{DMSO-}d_6$ ) spectrum of compound <b>6</b> ( <b>continued</b> )   | 62 |
| Figure S63. The HSQC spectrum of compound <b>6</b>                                                                     | 63 |
| Figure S64. The HMBC spectrum of compound <b>6</b>                                                                     | 64 |
| Figure S65. The HMBC spectrum of compound <b>6</b> ( <b>continued</b> )                                                | 65 |
| Figure S66. The HMBC spectrum of compound <b>6</b> ( <b>continued</b> )                                                | 66 |
| Figure S67. The HMBC spectrum of compound <b>6</b> ( <b>continued</b> )                                                | 67 |
| Figure S68. The $^1\text{H}$ - $^1\text{H}$ COSY spectrum of compound <b>6</b>                                         | 68 |
| Figure S69. The NOESY spectrum of compound <b>6</b>                                                                    | 69 |
| Figure S70. The NOESY spectrum of compound <b>6</b> ( <b>continued</b> )                                               | 70 |
| <b>Compound 7</b>                                                                                                      |    |
| Figure S71. The HR-ESI-MS spectrum of compound <b>7</b>                                                                | 71 |
| Figure S72. The UV spectrum of compound <b>7</b>                                                                       | 72 |
| Figure S73. The IR spectrum of compound <b>7</b> (ATR)                                                                 | 73 |
| Figure S74. The $^1\text{H}$ NMR (400 MHz, $\text{CD}_3\text{OD}$ ) spectrum of compound <b>7</b>                      | 74 |
| Figure S75. The $^1\text{H}$ NMR (400 MHz, $\text{CD}_3\text{OD}$ ) spectrum of compound <b>7</b> ( <b>continued</b> ) | 75 |
| Figure S76. The $^{13}\text{C}$ NMR (100 MHz, $\text{CD}_3\text{OD}$ ) spectrum of compound <b>7</b>                   | 76 |

|                                                                                                          |    |
|----------------------------------------------------------------------------------------------------------|----|
| Figure S77. The HSQC spectrum of compound <b>7</b>                                                       | 77 |
| Figure S78. The HSQC spectrum of compound <b>7 (continued)</b>                                           | 78 |
| Figure S79. The HMBC spectrum of compound <b>7</b>                                                       | 79 |
| Figure S80. The HMBC spectrum of compound <b>7 (continued)</b>                                           | 80 |
| Figure S81. The $^1\text{H}$ - $^1\text{H}$ COSY spectrum of compound <b>7</b>                           | 81 |
| Figure S82. The NOESY spectrum of compound <b>7</b>                                                      | 82 |
| <b>Compound 8</b>                                                                                        |    |
| Figure S83. The HR-ESI-MS spectrum of compound <b>8</b>                                                  | 83 |
| Figure S84. The UV spectrum of compound <b>8</b>                                                         | 84 |
| Figure S85. The IR spectrum of compound <b>8</b> (ATR)                                                   | 85 |
| Figure S86. The $^1\text{H}$ NMR (400 MHz, acetone- $d_6$ ) spectrum of compound <b>8</b>                | 86 |
| Figure S87. The $^1\text{H}$ NMR (400 MHz, acetone- $d_6$ ) spectrum of compound <b>8</b>                | 87 |
| Figure S88. The $^{13}\text{C}$ NMR (100 MHz, acetone- $d_6$ ) spectrum of compound <b>8</b>             | 88 |
| Figure S89. The $^{13}\text{C}$ NMR (100 MHz, acetone- $d_6$ ) spectrum of compound <b>8 (continued)</b> | 89 |
| Figure S90. The HSQC spectrum of compound <b>8</b>                                                       | 90 |
| Figure S91. The HMBC spectrum of compound <b>8</b>                                                       | 91 |
| Figure S92. The HMBC spectrum of compound <b>8 (continued)</b>                                           | 92 |

|                                                                                                                                                                |    |
|----------------------------------------------------------------------------------------------------------------------------------------------------------------|----|
| Figure S93. The HMBC spectrum of compound <b>8</b> ( <b>continued</b> )                                                                                        | 93 |
| Figure S94. The HMBC spectrum of compound <b>8</b> ( <b>continued</b> )                                                                                        | 94 |
| Figure S95. The $^1\text{H}$ - $^1\text{H}$ COSY spectrum of compound <b>8</b>                                                                                 | 95 |
| Figure S96. The NOESY spectrum of compound <b>8</b>                                                                                                            | 96 |
| <b>NO inhibition</b>                                                                                                                                           |    |
| Figure S97. Effects of compounds isolated from <i>M. siamensis</i> roots against LPS-induced nitric oxide production<br>in RAW 264.7 cells.                    | 97 |
| Figure S98. The $\text{IC}_{50}$ values of compound isolated from <i>M. siamensis</i> roots against LPS-induced nitric oxide production<br>in RAW 264.7 cells. | 98 |

## Mass Spectrum SmartFormula Report

### Analysis Info

Analysis Name D:\Data\7\MSRE824B144\_000002.d  
Method broadband first signal  
Sample Name MSRE-8-2-4B-14-4  
Comment ESI Positive

11/14/2019 3:43:09 PM  
Operator: YU HSIAO-CHING  
Instrument: BRUKER FT-MS solariX

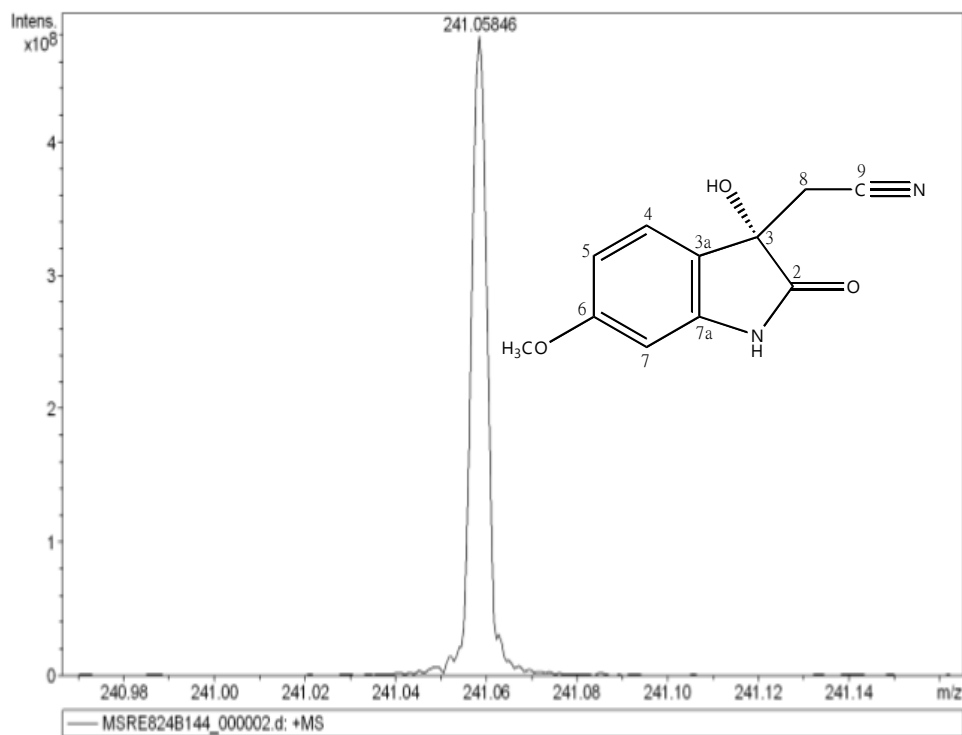

| Meas. m/z | # | Formula                                                         | Score  | m/z       | err [mDa] | err [ppm] | mSigma | rdB | e <sup>-</sup> Conf | N-Rule |
|-----------|---|-----------------------------------------------------------------|--------|-----------|-----------|-----------|--------|-----|---------------------|--------|
| 241.05846 | 1 | C <sub>11</sub> H <sub>10</sub> N <sub>2</sub> NaO <sub>3</sub> | 100.00 | 241.05836 | -0.09     | -0.39     | 9.4    | 7.5 | even                | ok     |

**Figure S1.** The HR-ESI-MS spectrum of compound **1**

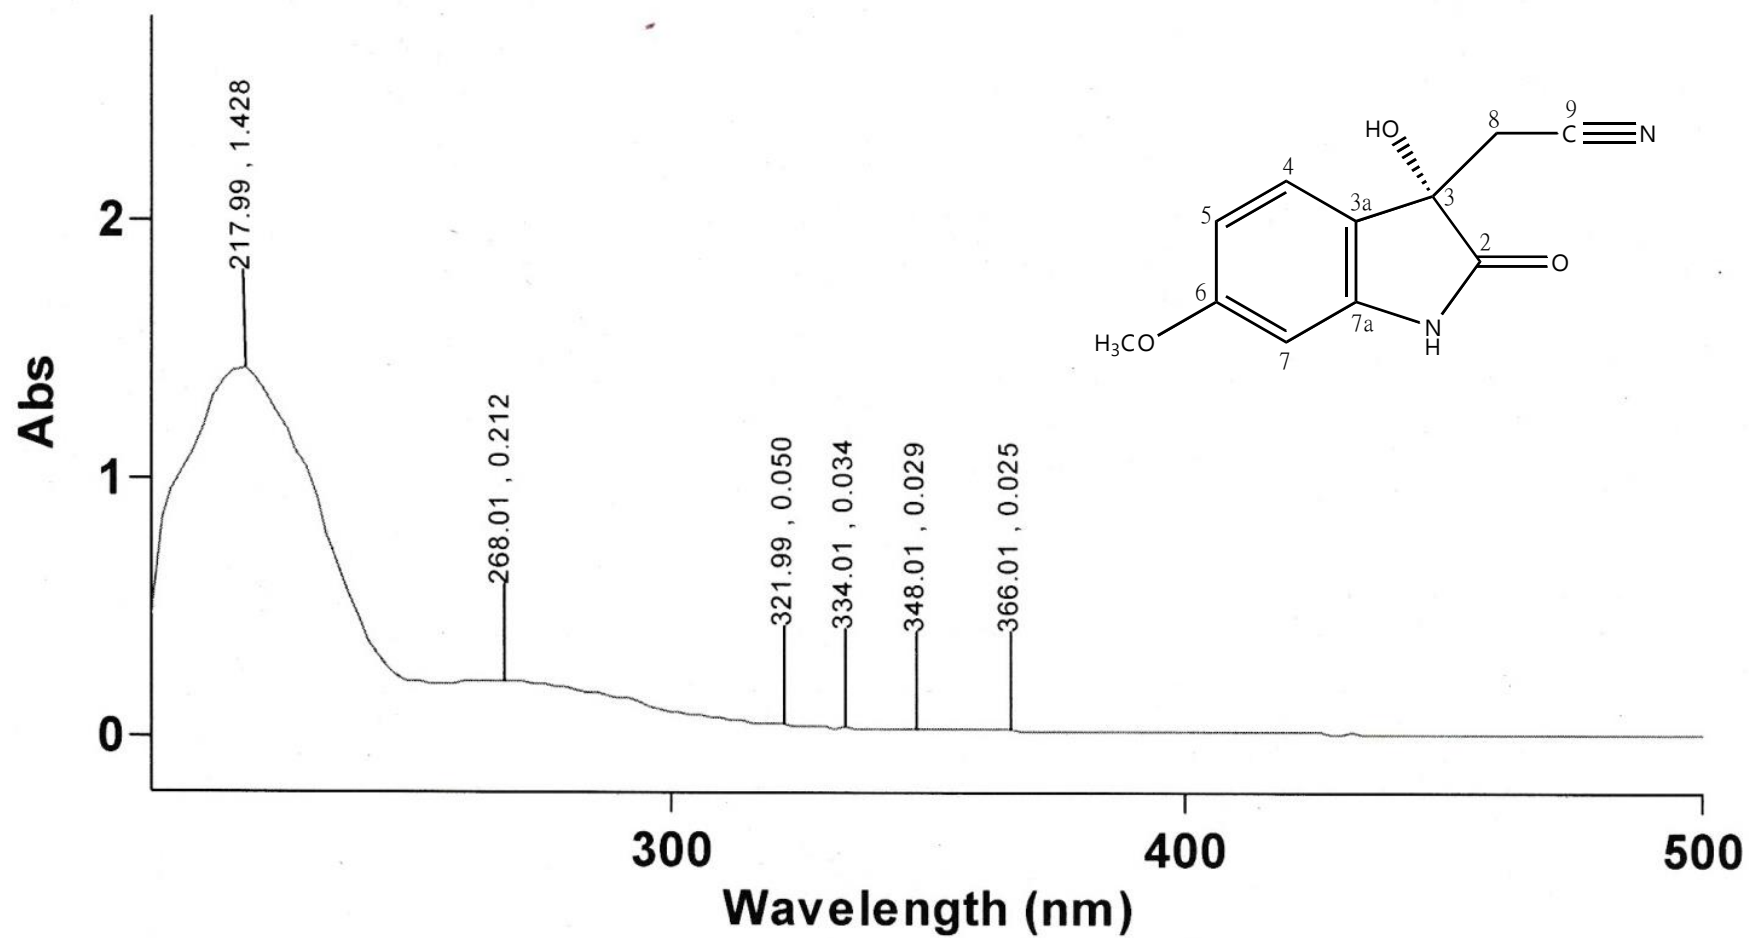

**Figure S2.** The UV spectrum of compound 1

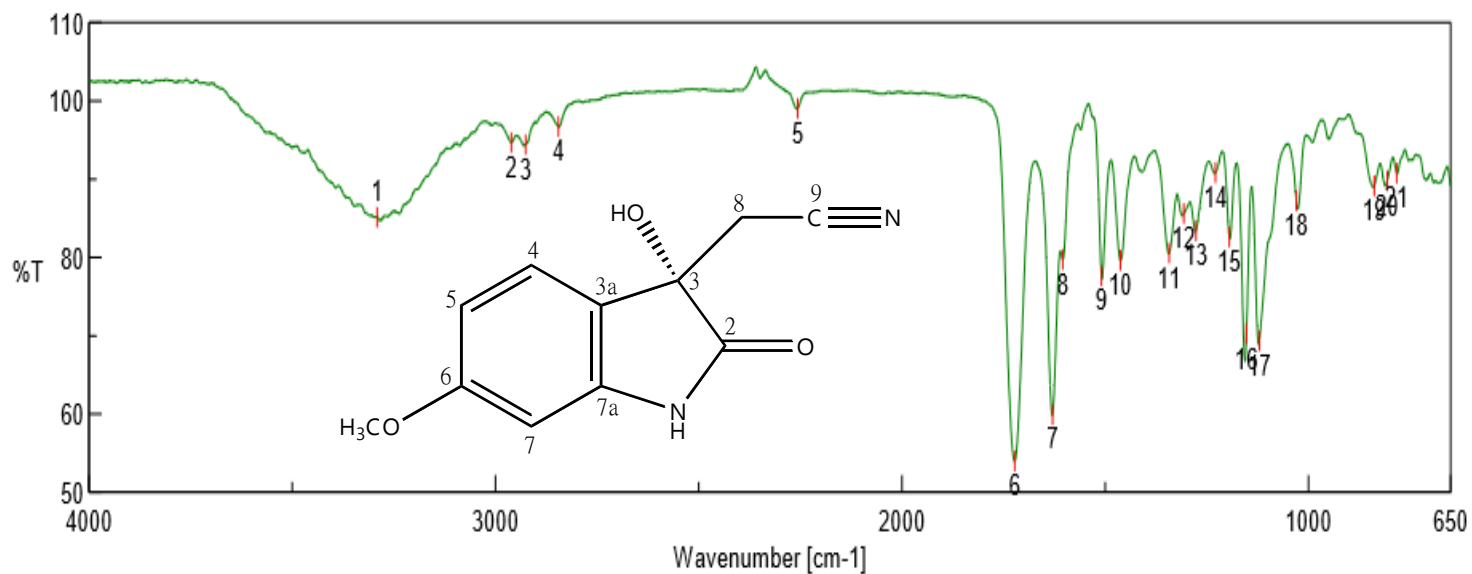

[ Result of Peak Picking ]

| No. | Position | Intensity | No. | Position | Intensity | No. | Position | Intensity |
|-----|----------|-----------|-----|----------|-----------|-----|----------|-----------|
| 1   | 3290.93  | 85.1235   | 2   | 2961.16  | 94.6663   | 3   | 2925.48  | 94.4219   |
| 4   | 2845.45  | 96.7096   | 5   | 2256.31  | 99.011    | 6   | 1722.12  | 53.9494   |
| 7   | 1629.55  | 59.8982   | 8   | 1604.48  | 79.7356   | 9   | 1509.03  | 77.612    |
| 10  | 1462.74  | 79.6136   | 11  | 1342.21  | 80.5442   | 12  | 1306.54  | 85.5827   |
| 13  | 1276.65  | 83.3796   | 14  | 1228.43  | 90.8438   | 15  | 1194.69  | 82.6032   |
| 16  | 1152.26  | 70.2385   | 17  | 1120.44  | 69.3525   | 18  | 1029.8   | 87.2652   |
| 19  | 837.919  | 89.1314   | 20  | 806.099  | 89.7656   | 21  | 782.958  | 90.7427   |

**Figure S3.** The IR spectrum of compound **1** (ATR)

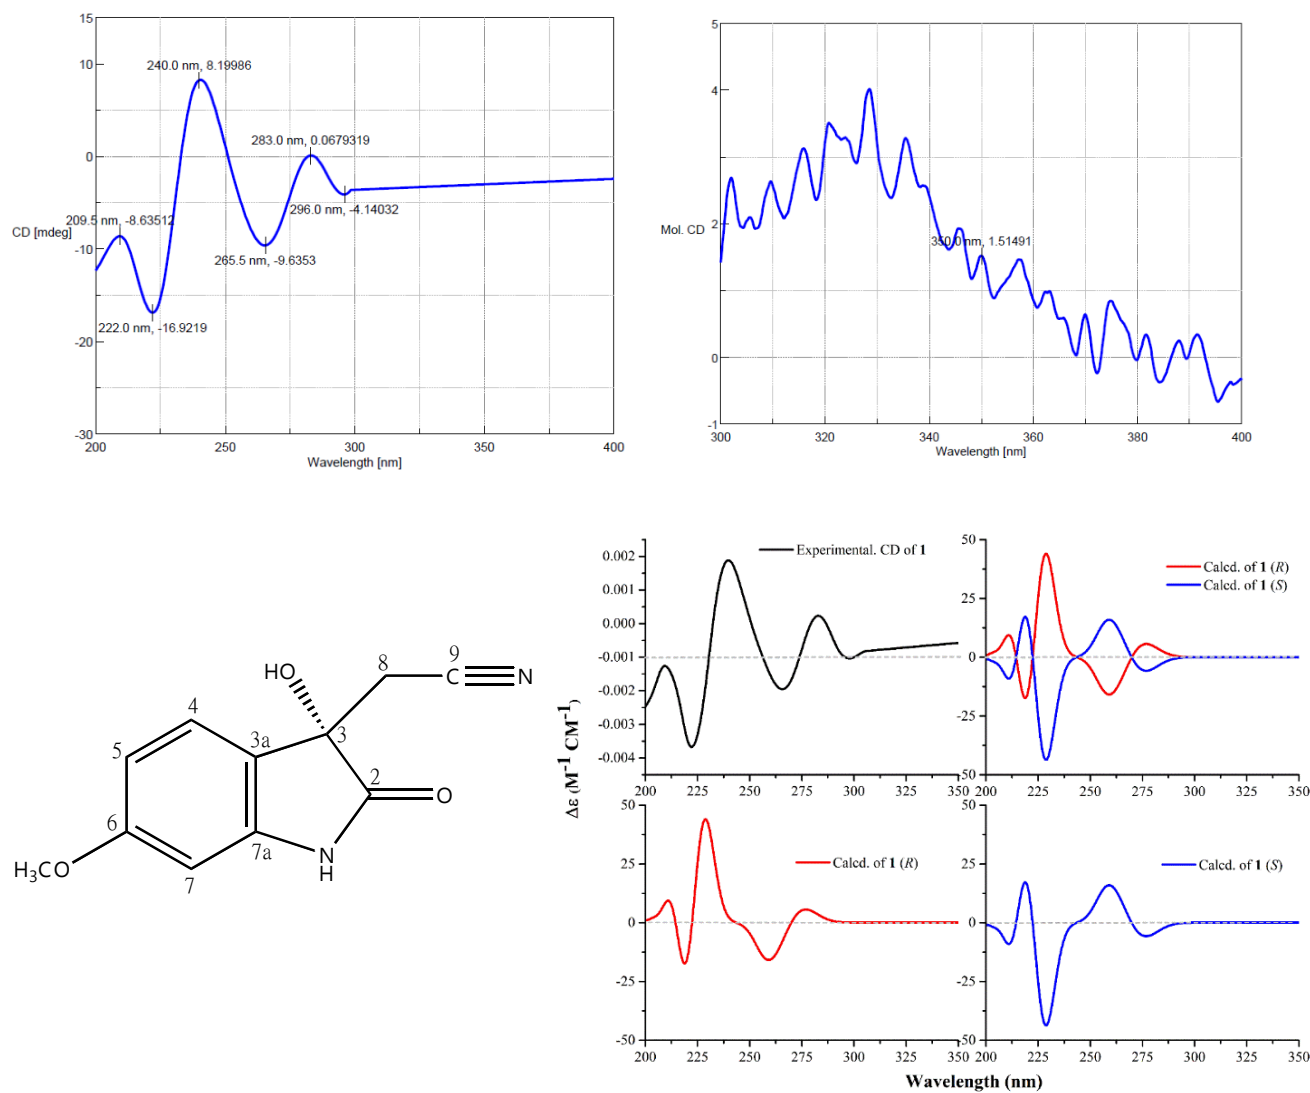

**Figure S4.** The CD spectrum in MeOH of compound **1** (upper left) and The Rh<sub>2</sub> (OCOCF<sub>3</sub>)<sub>4</sub> Induced CD spectrum of **1** CH<sub>2</sub>Cl<sub>2</sub> (upper right). ECD spectrum of **1** (lower right)



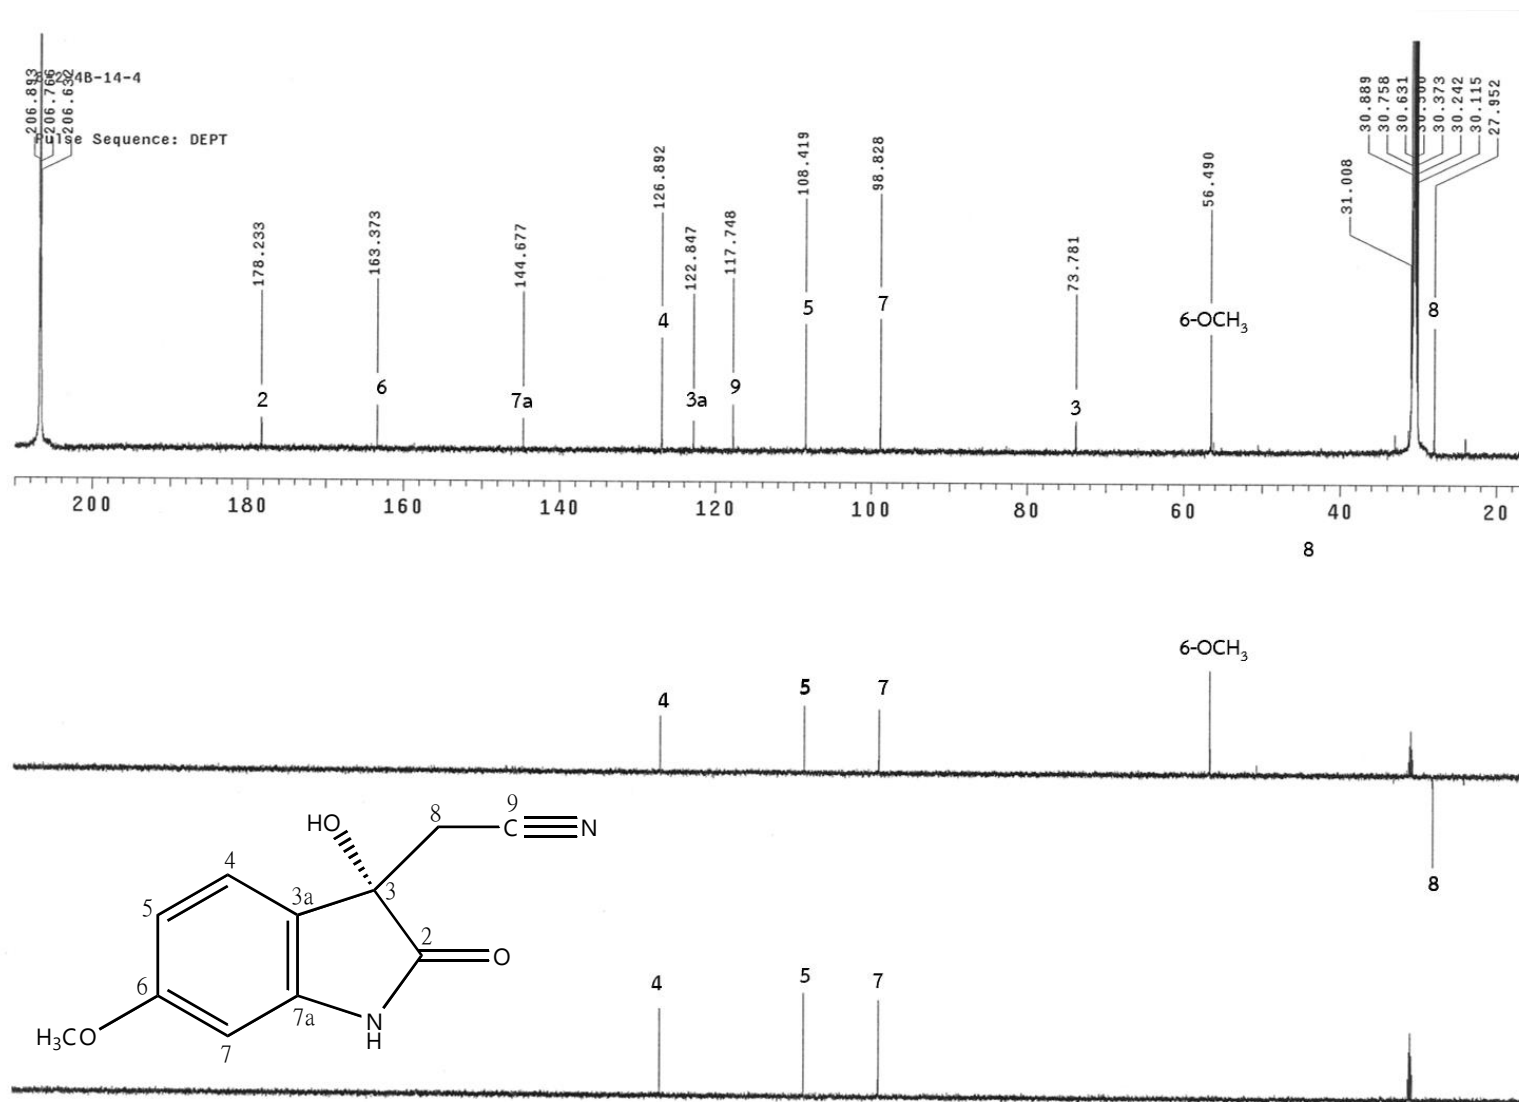

**Figure S5.** The <sup>13</sup>C-NMR, DEPT 135 and DEPT 90 (150 MHz, acetone-*d*<sub>6</sub>) spectra of compound 1

8-2-4B-14-4

Pulse Sequence: s2pu1  
 UNITYplus-600 "KMU600.kmu.edu.tw"  
 Date: Oct 7 2019  
 Solvent: acetone  
 Temp: 28.0 C / 301.1 K  
 Total 128 repetitions

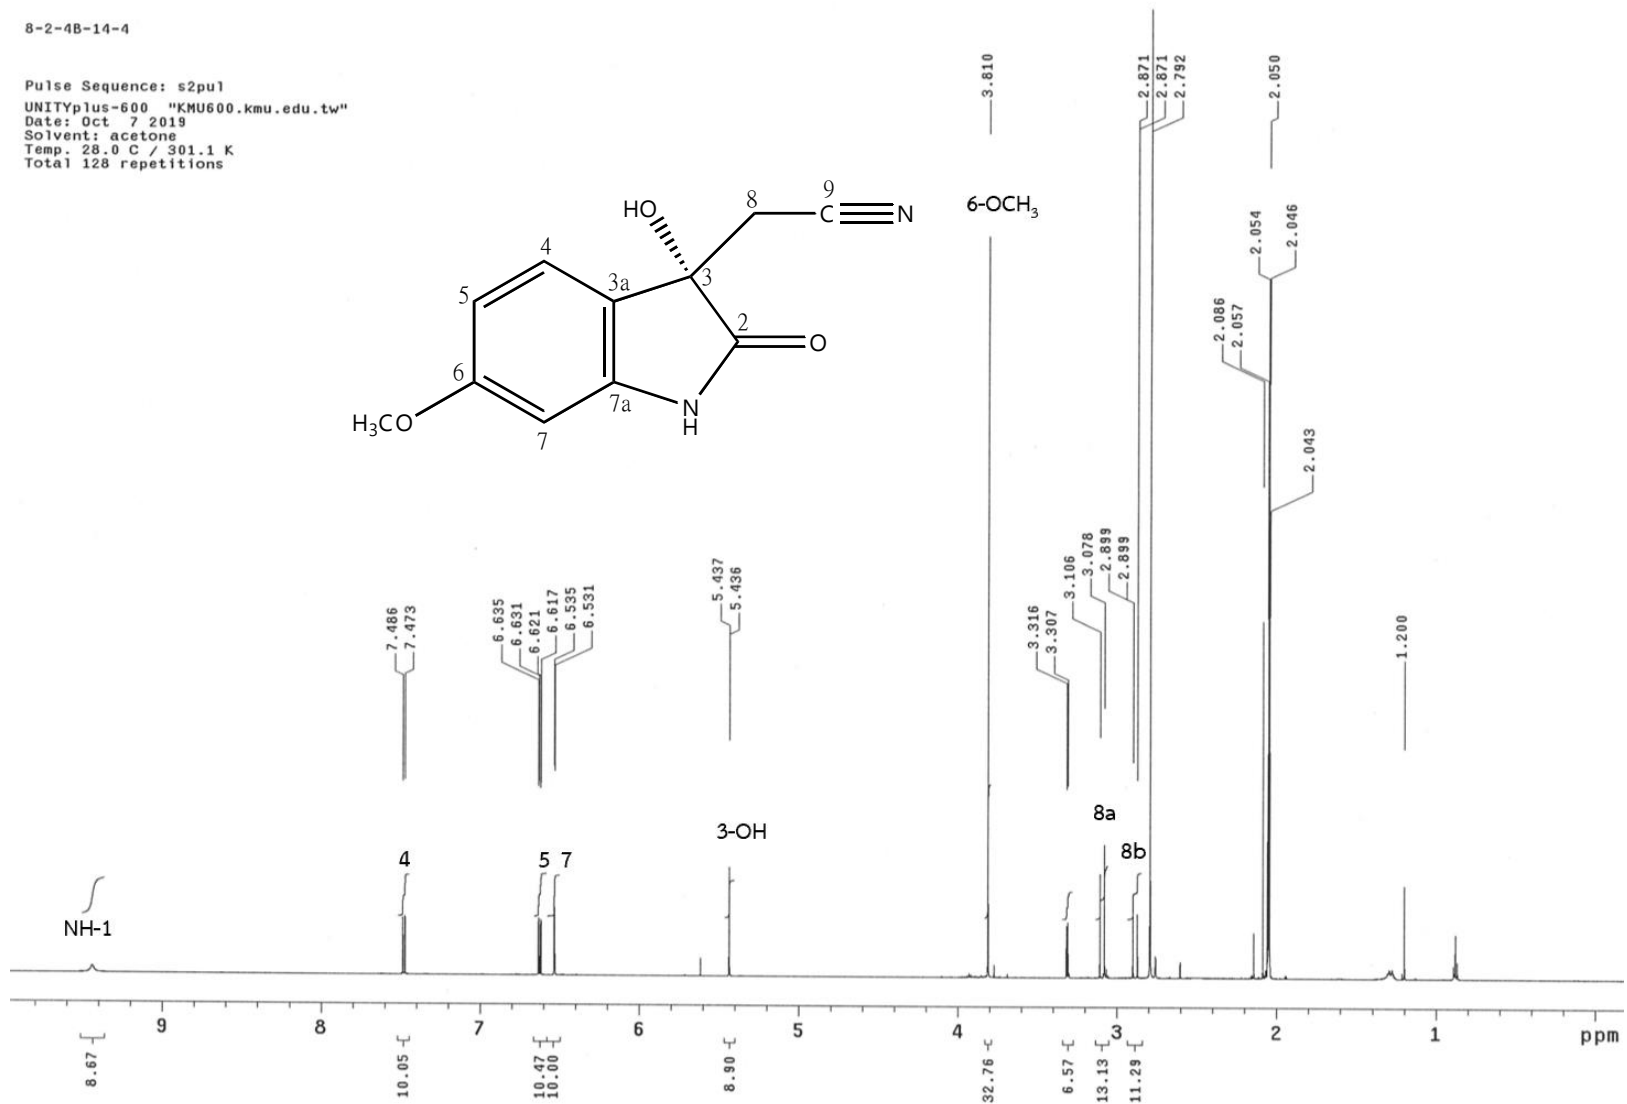

**Figure S6.** The <sup>1</sup>H NMR (600 MHz, acetone-*d*<sub>6</sub>) spectrum of compound **1**

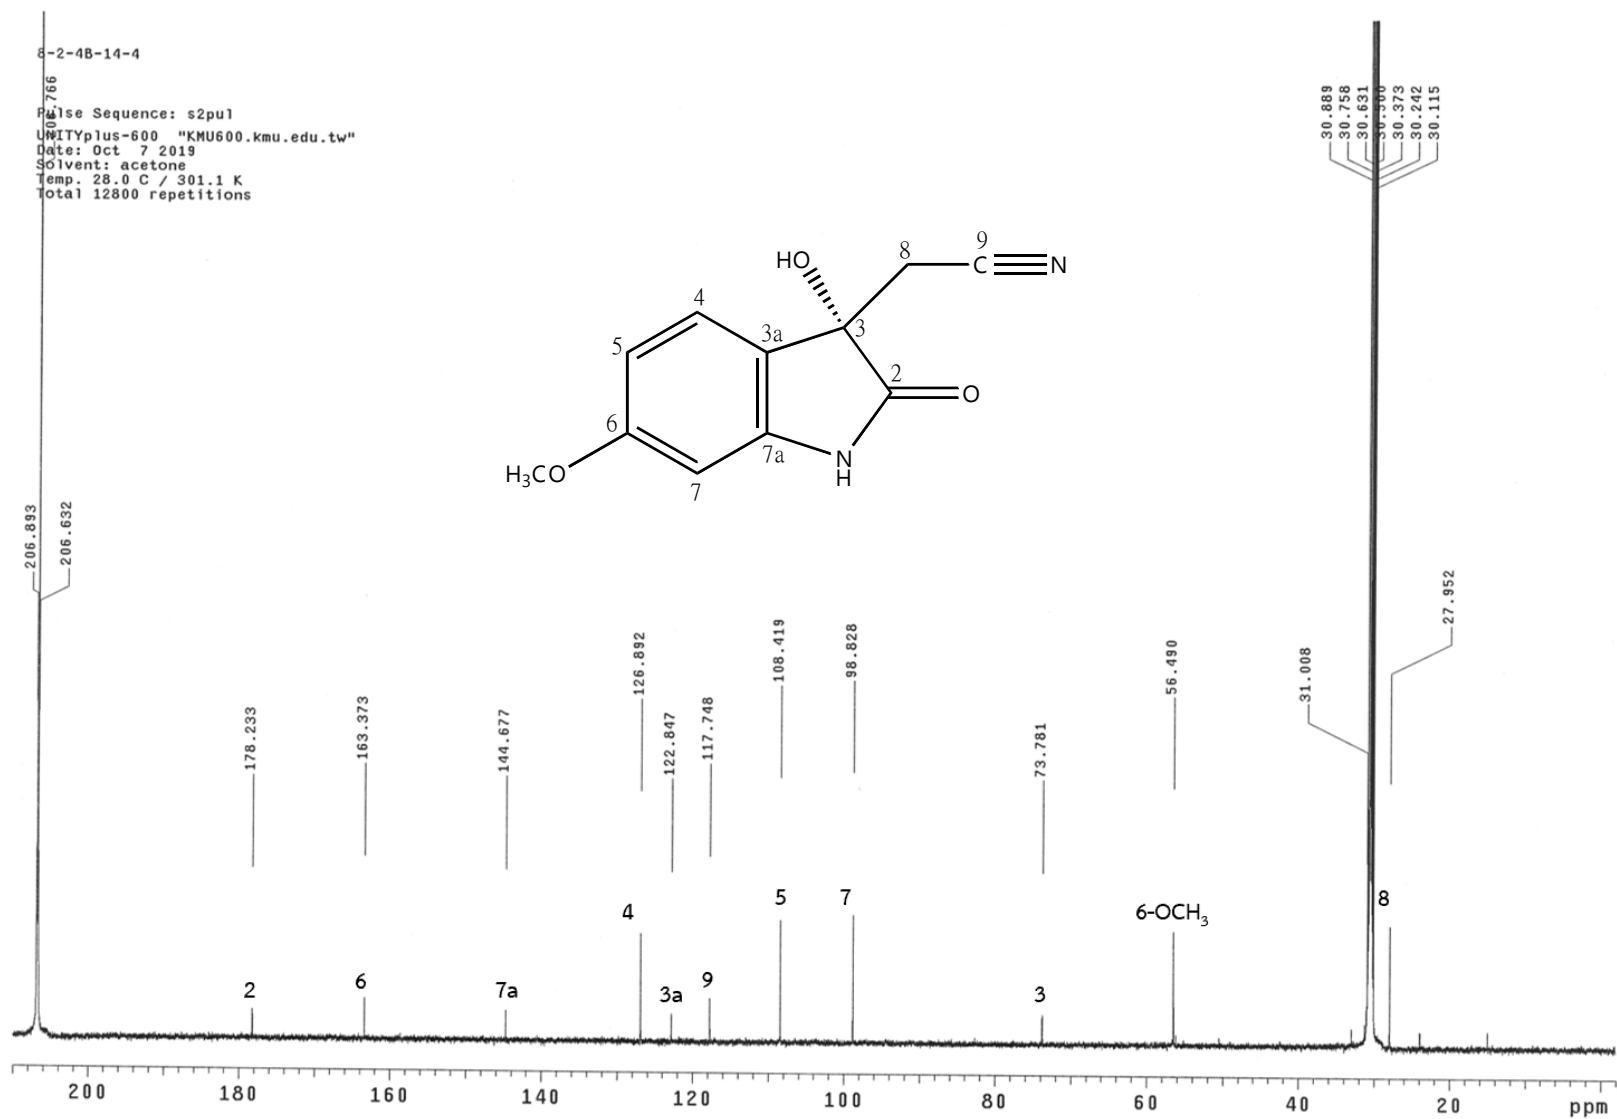

**Figure S7.** The <sup>13</sup>C-NMR (150 MHz, acetone-*d*<sub>6</sub>) spectra of compound **1**

8-2-4B-14-4

Pulse Sequence: gHSQCAD

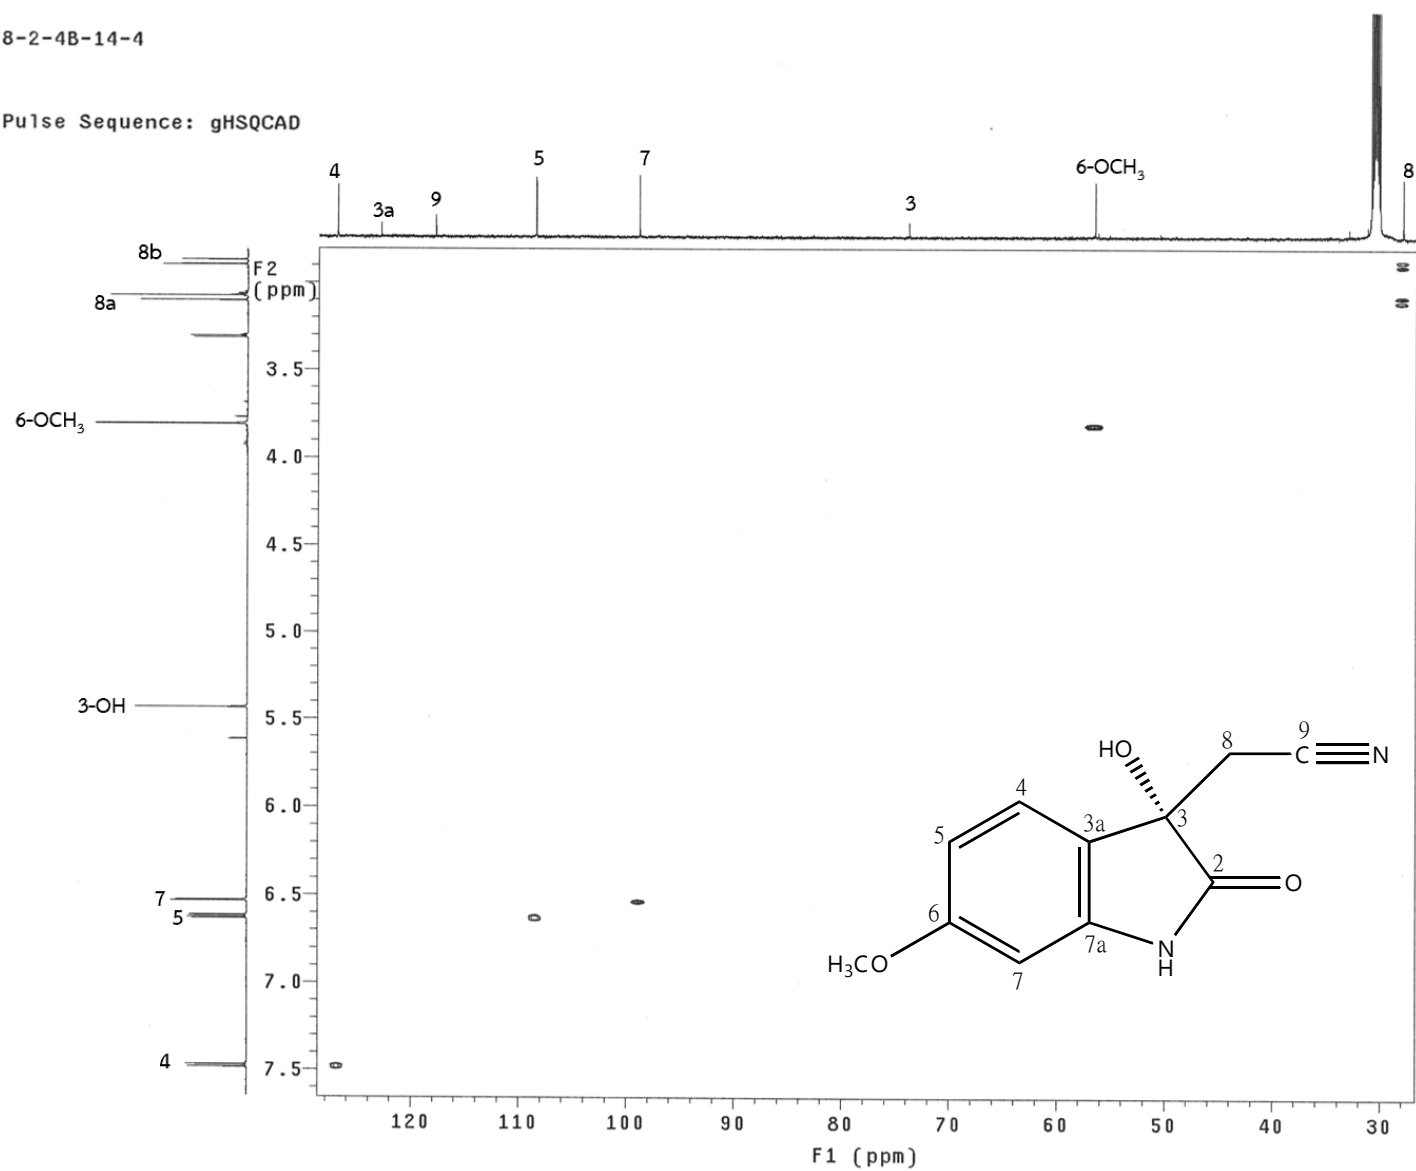

**Figure S8.** The HSQC spectrum of compound 1

8-2-4B-14-4

Pulse Sequence: gHMBCAD

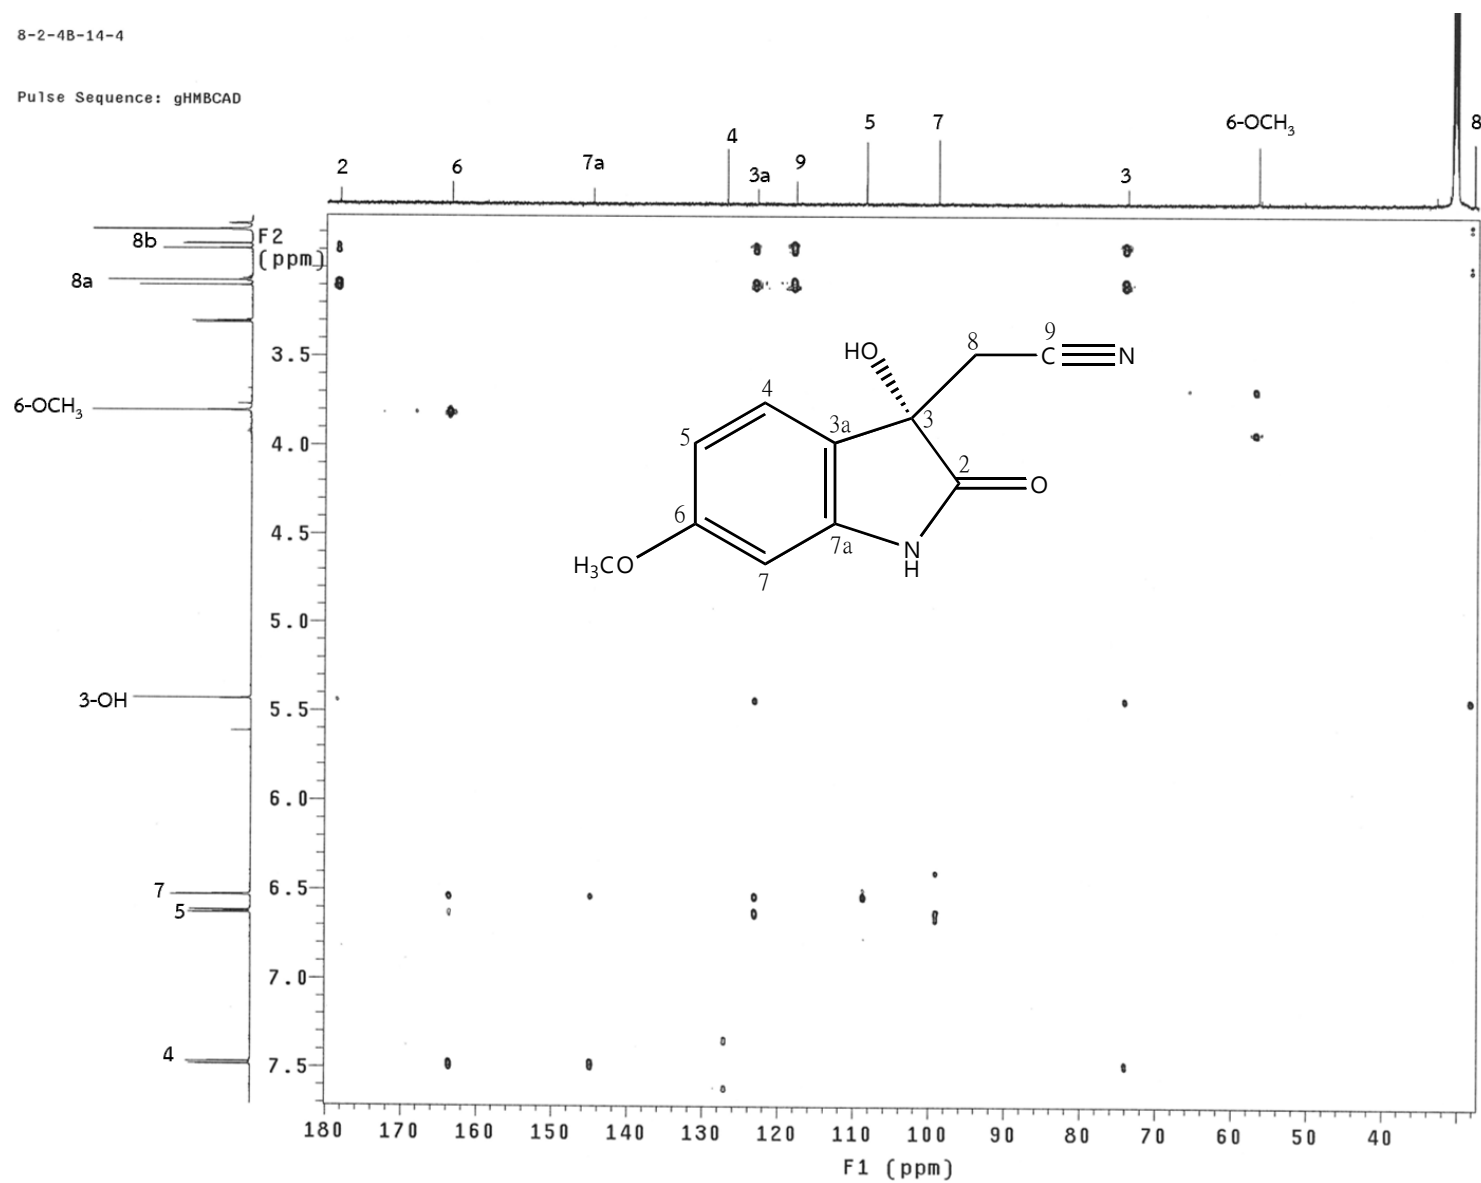

Figure S9. The HMBC spectrum of compound 1

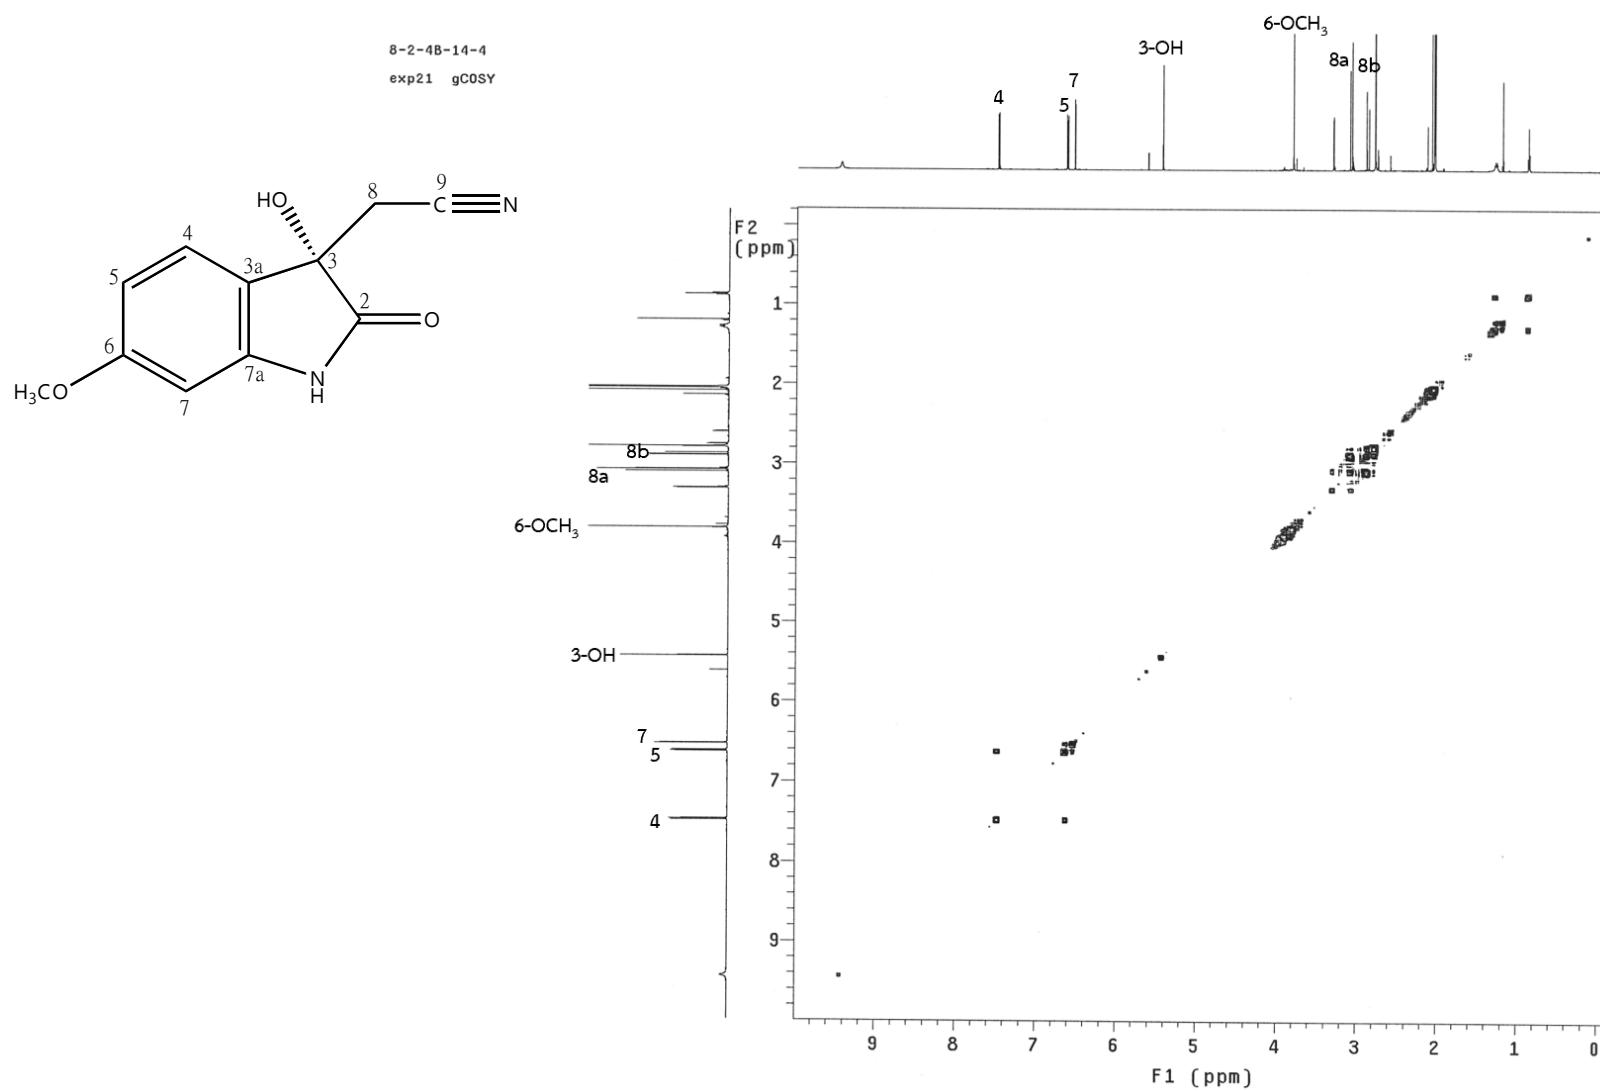

**Figure S10.** The <sup>1</sup>H-<sup>1</sup>H COSY spectrum of compound **1**

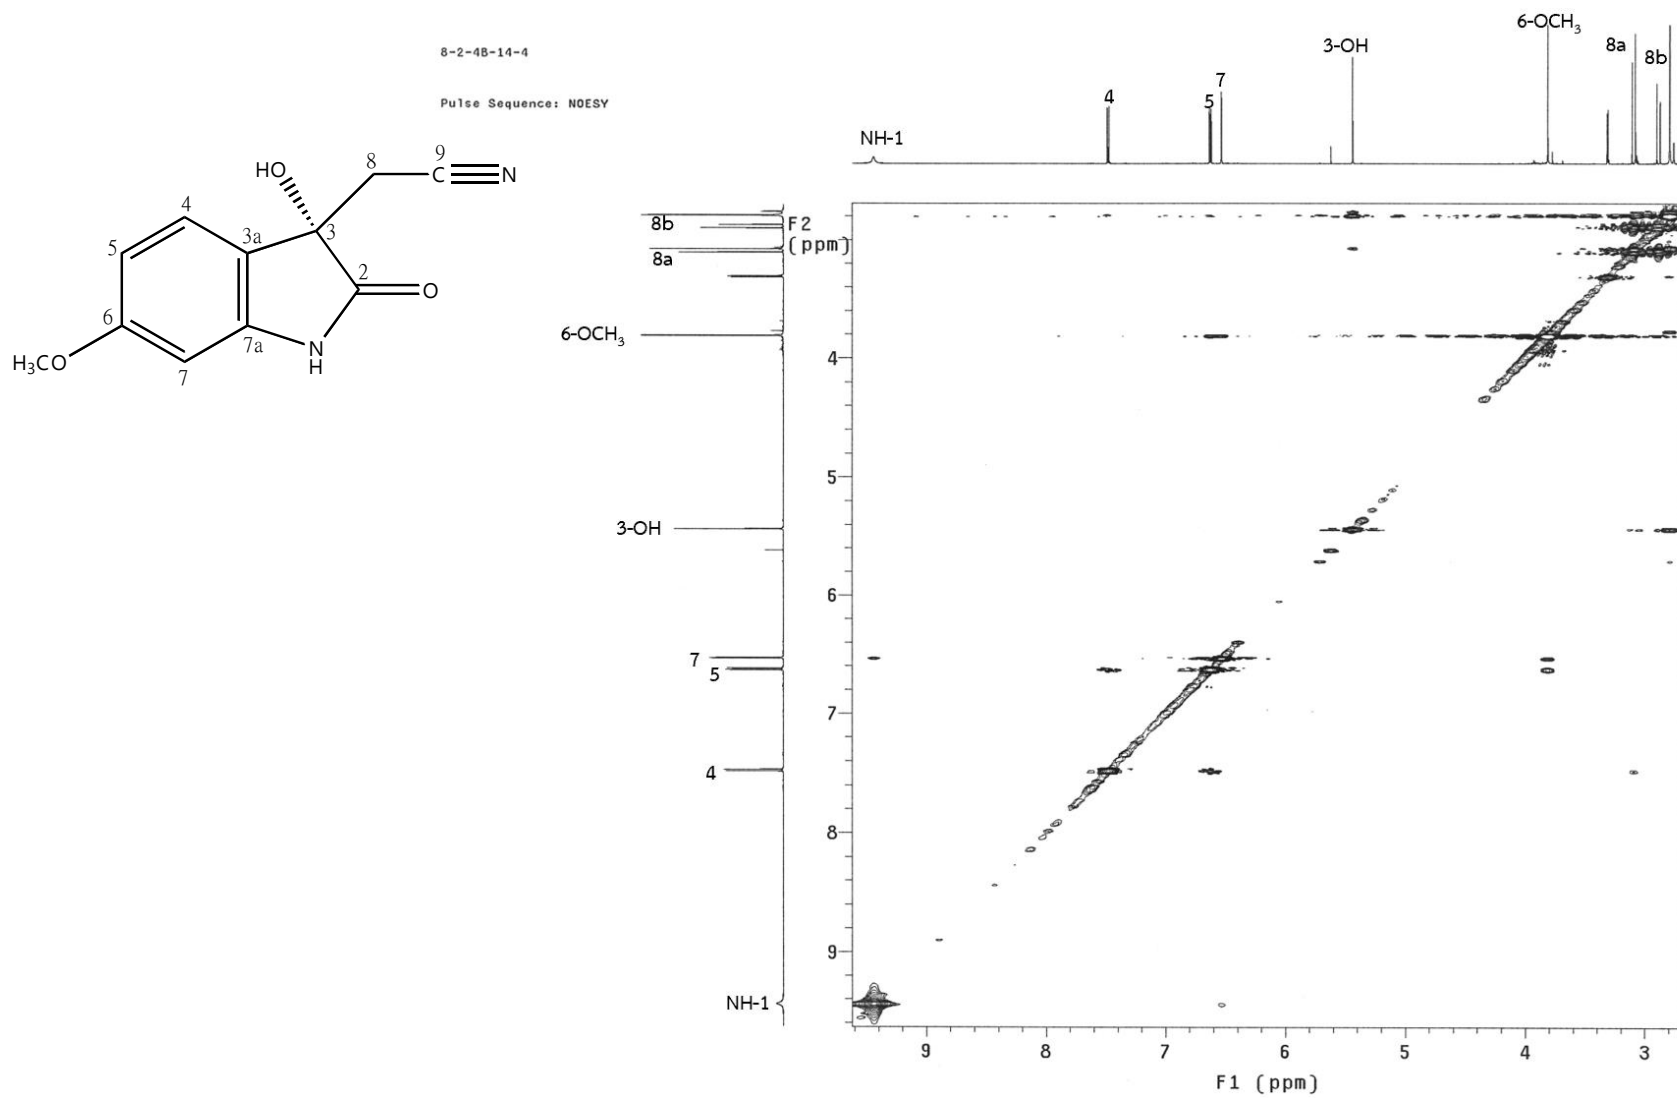

**Figure S11.** The NOESY spectrum of compound 1

## Mass Spectrum SmartFormula Report

### Analysis Info

Analysis Name D:\Data\7\MSRE824B148\_000002.d  
Method broadband first signal  
Sample Name MSRE-8-2-4B  
Comment ESI Positive

6/30/2020 3:26:08 PM  
Operator: YU HSIAO-CHING  
Instrument: BRUKER FT-MS solariX

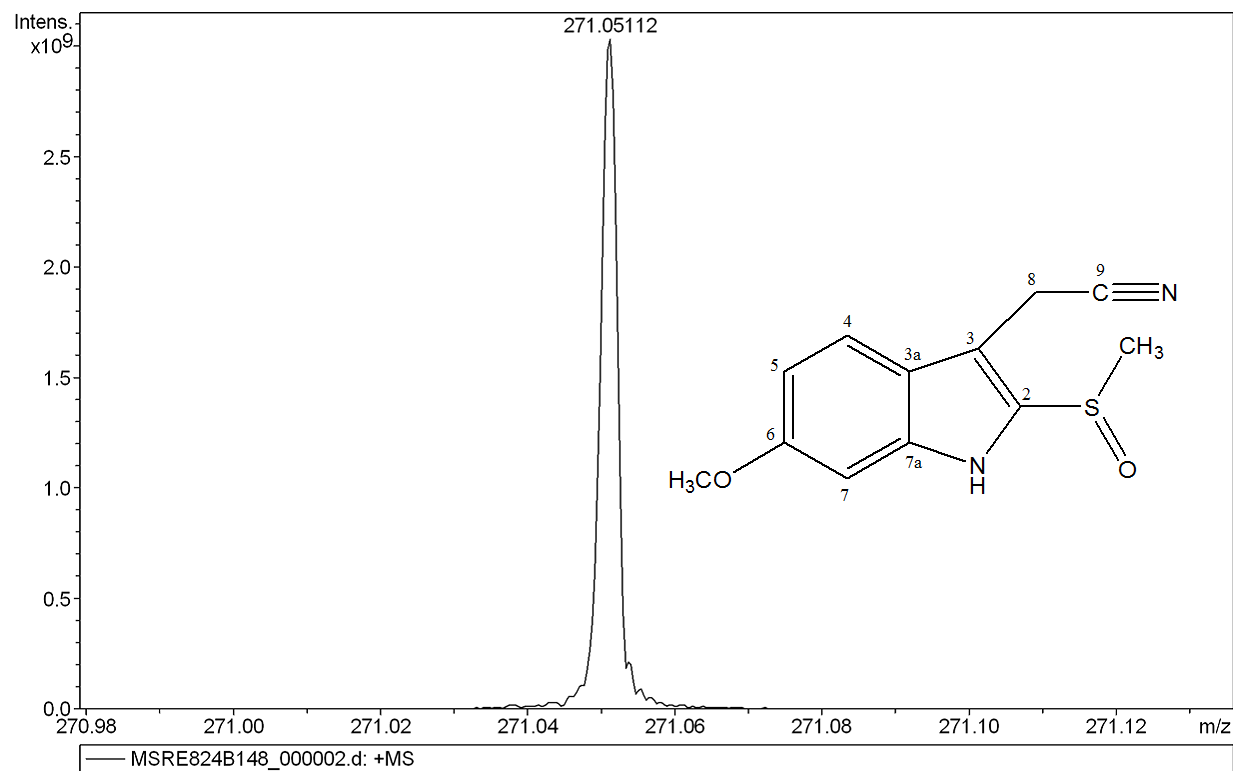

| Meas. m/z | # | Formula                | Score  | m/z       | err [mDa] | err [ppm] | mSigma | rdB | e <sup>-</sup> Conf | N-Rule |
|-----------|---|------------------------|--------|-----------|-----------|-----------|--------|-----|---------------------|--------|
| 271.05112 | 1 | C 12 H 12 N 2 Na O 2 S | 100.00 | 271.05117 | 0.05      | 0.19      | 38.1   | 7.5 | even                | ok     |

**Figure S12.** The HR-ESI-MS spectrum of compound **2**



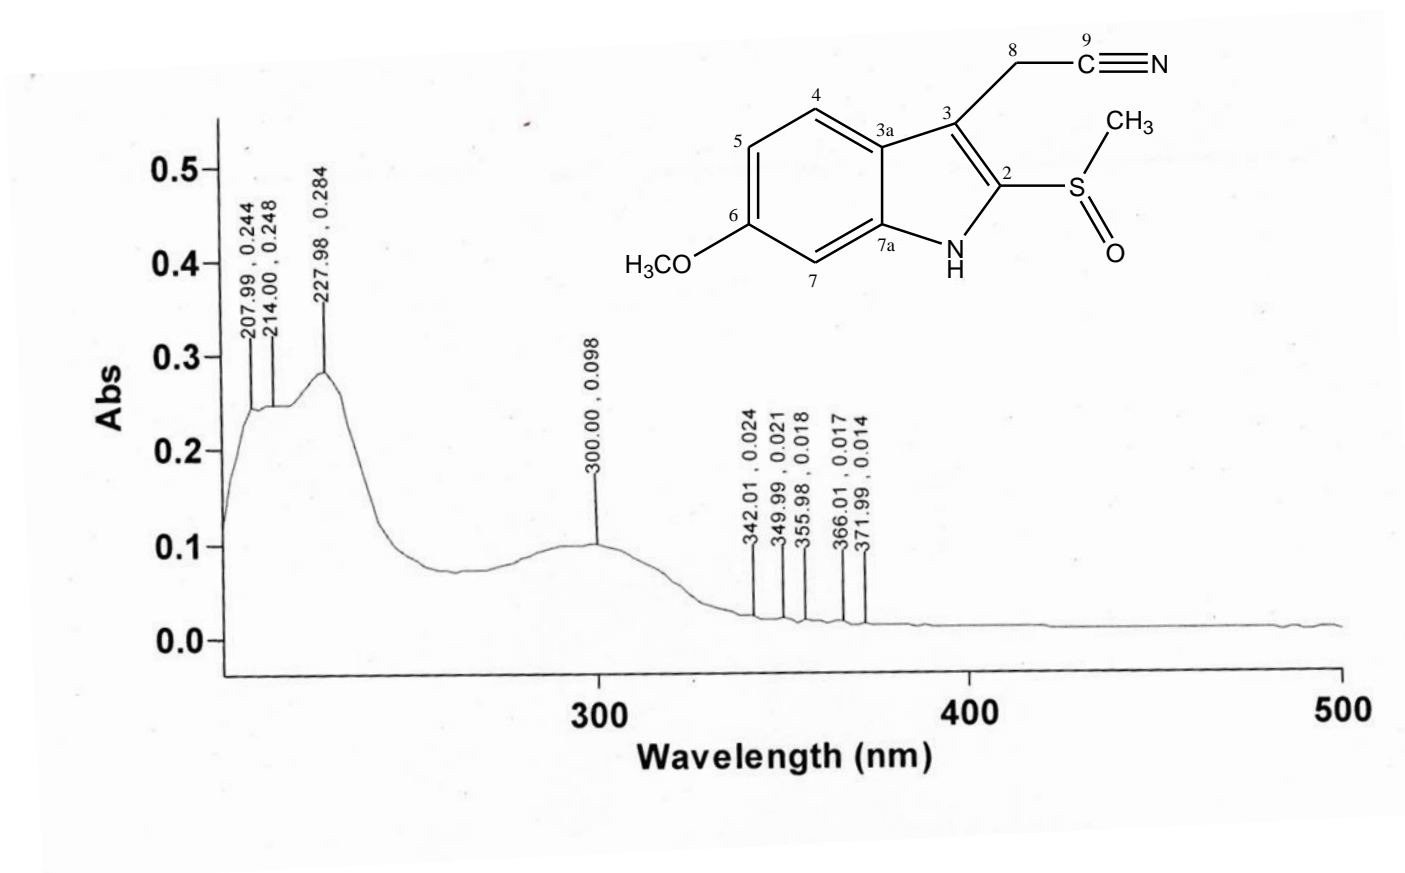

**Figure S13.** The UV spectrum of compound 2

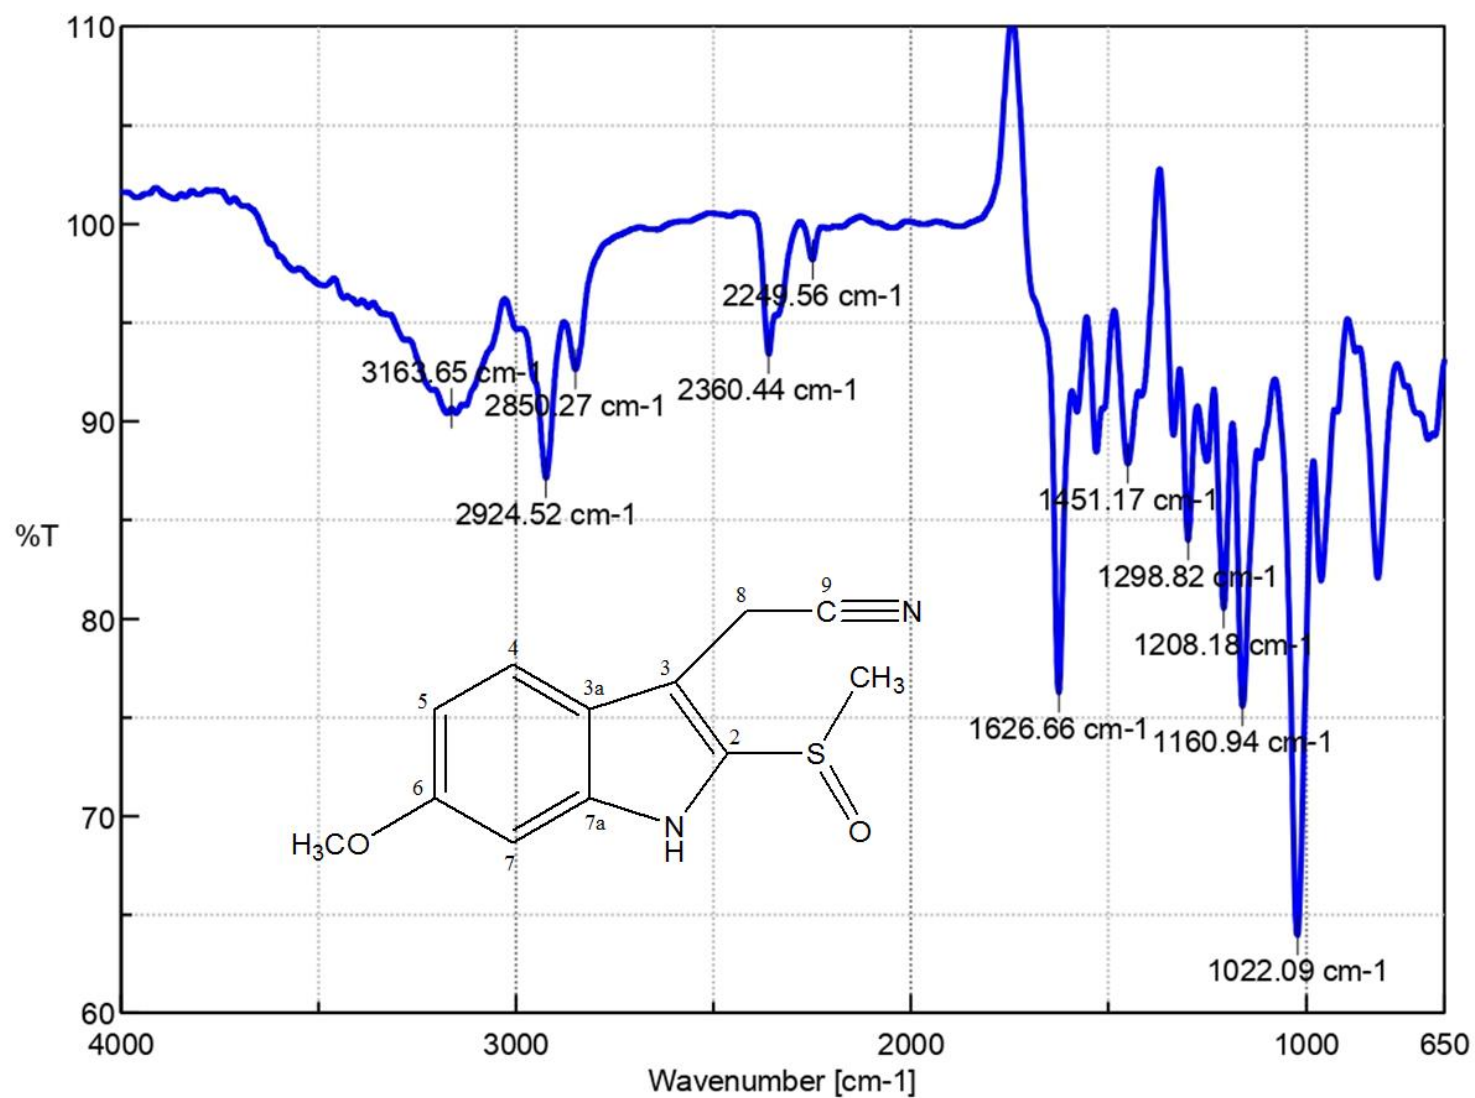

**Figure S14.** The IR spectrum of compound **2** (ATR)

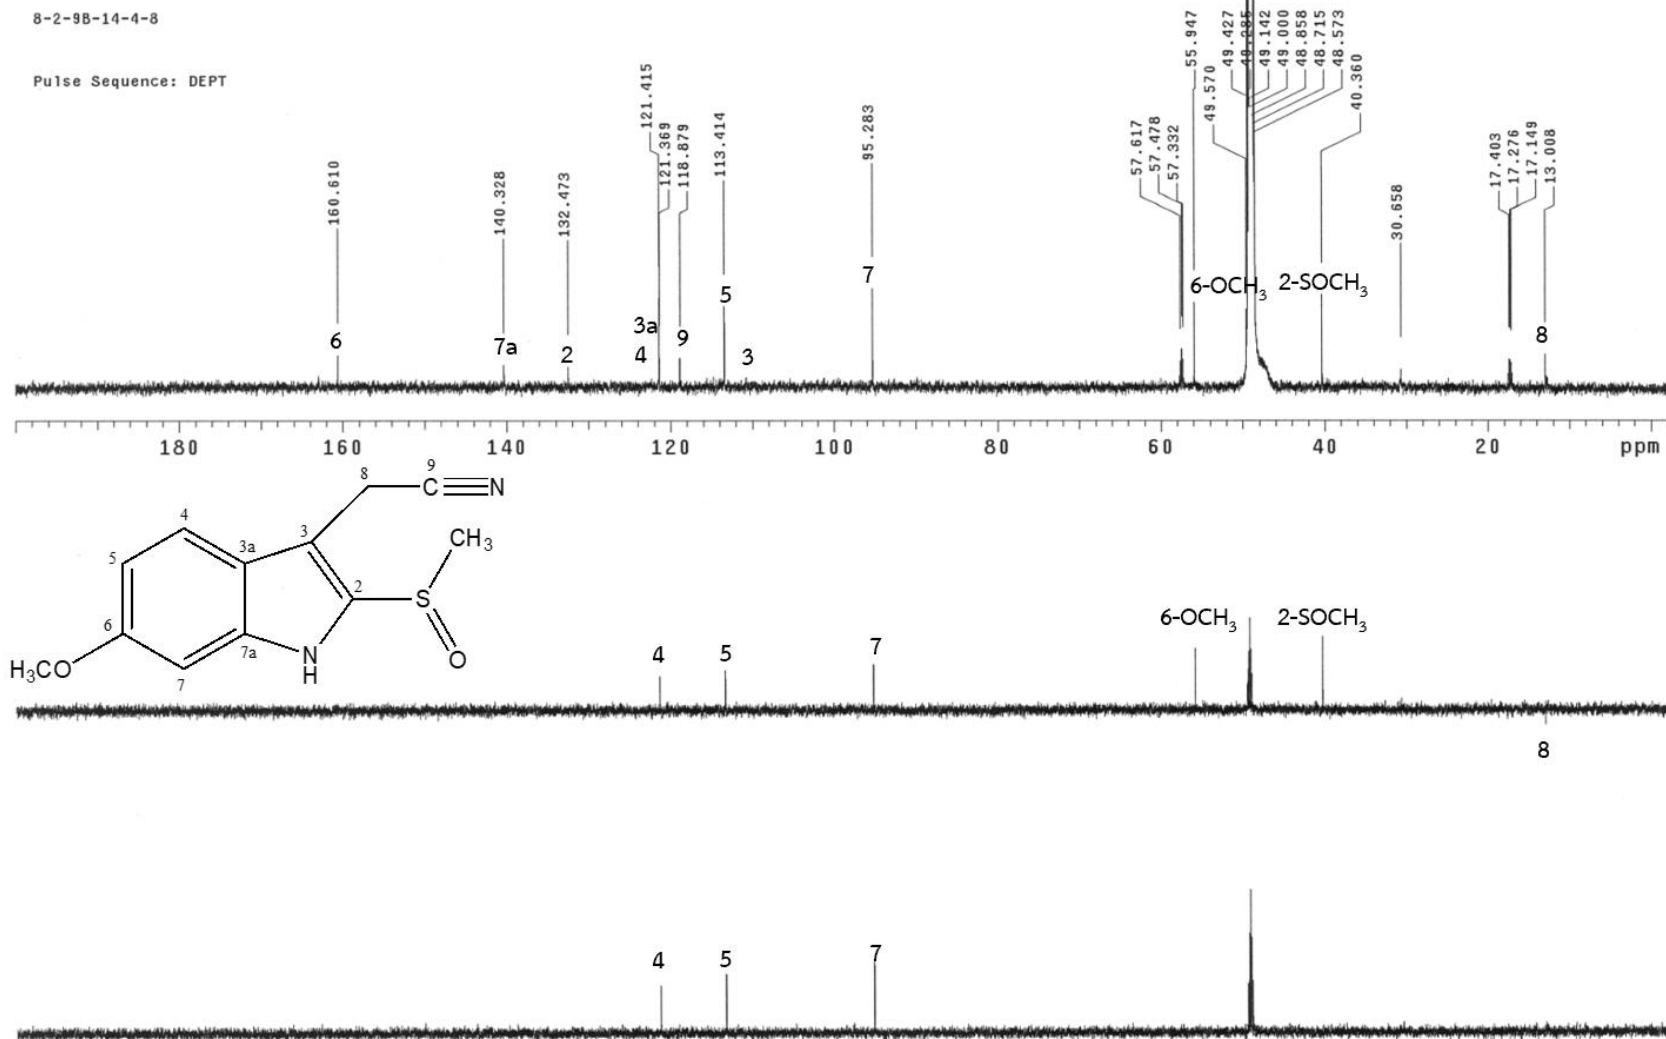

**Figure S15.** The  $^{13}\text{C}$ -NMR, DEPT 135 and DEPT 90 (150 MHz,  $\text{CD}_3\text{OD}$ ) spectra of compound 2

8-2-9B-14-4-8

Pulse Sequence: s2pu1  
UNITYplus-600 "KMU600.kmu.edu.tw"  
Date: Oct 4 2019  
Solvent: cd3od  
Temp. 28.0 C / 301.1 K  
Total 160 repetitions

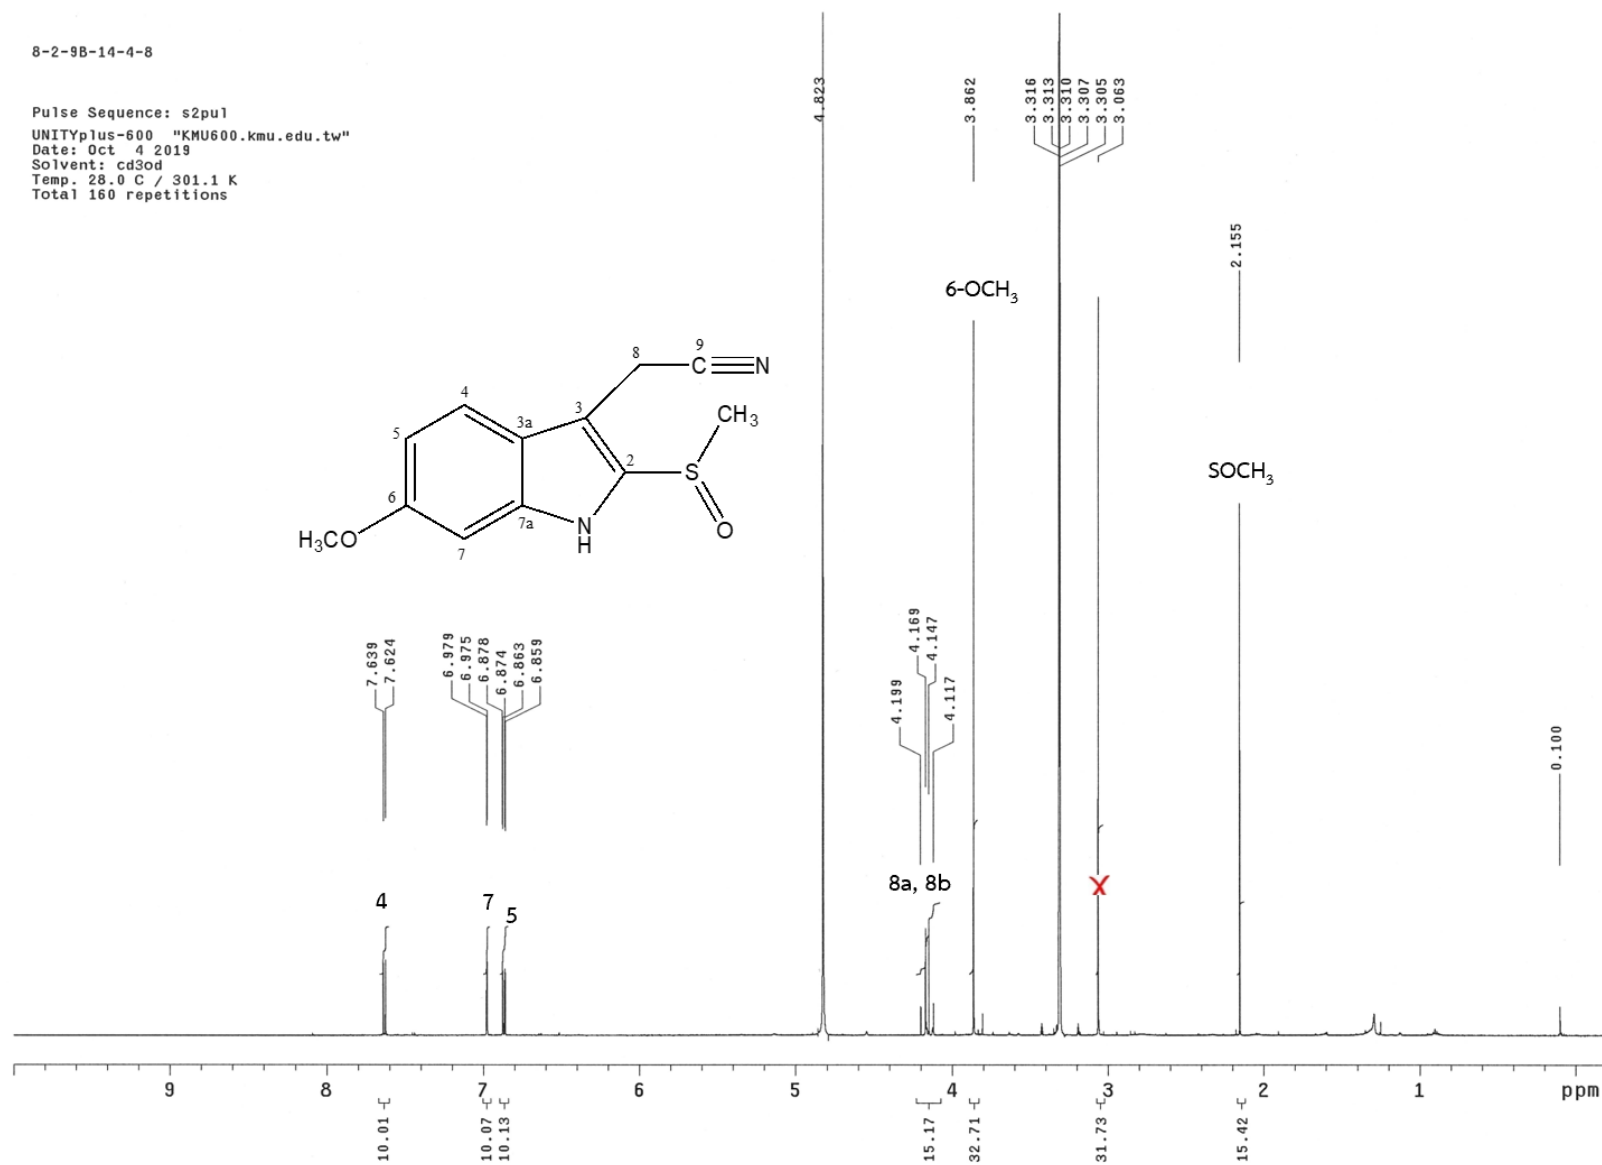

**Figure S16.** The <sup>1</sup>H NMR (600 MHz, CD<sub>3</sub>OD) spectrum of compound **2**

8-2-9B-14-4-8

Pulse Sequence: s2pu1  
UNITYplus-600 "KMU600.kmu.edu.tw"  
Date: Oct 4 2019  
Solvent: cd3od  
Temp. 28.0 C / 301.1 K  
Total 20480 repetitions

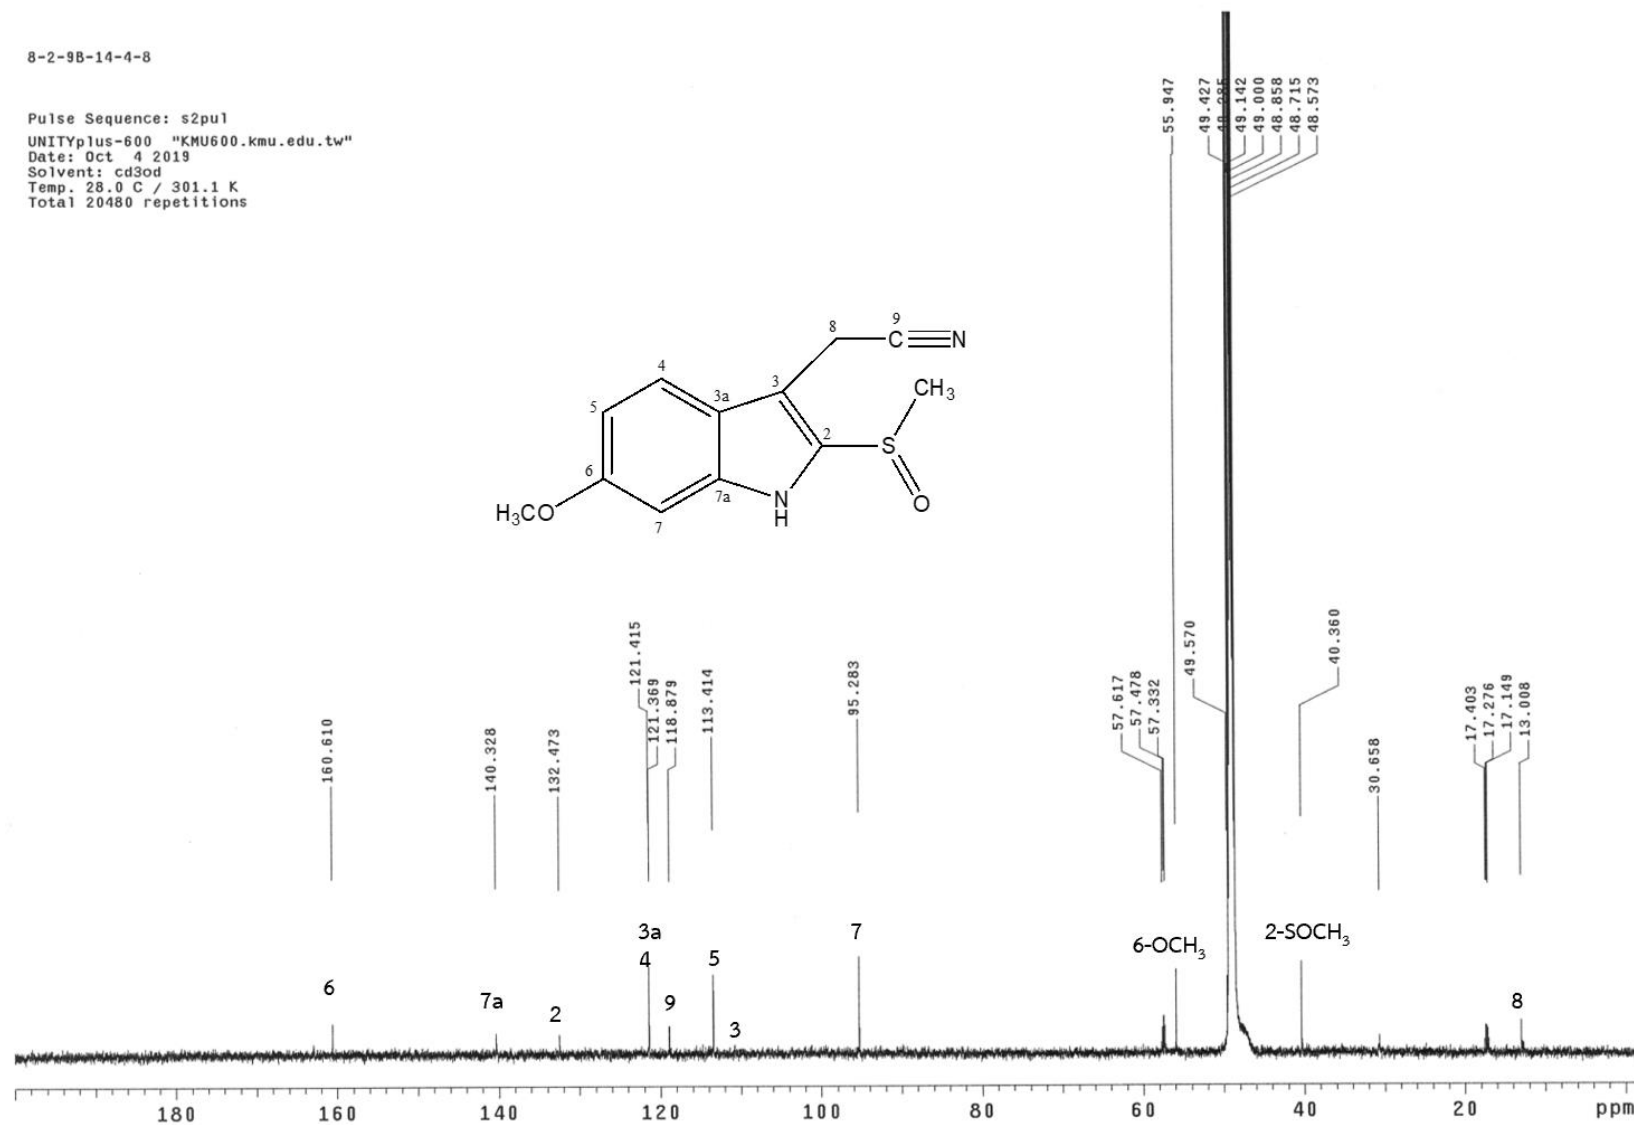

Figure S17. The <sup>13</sup>C NMR (150 MHz, CD<sub>3</sub>OD) spectrum of compound 2

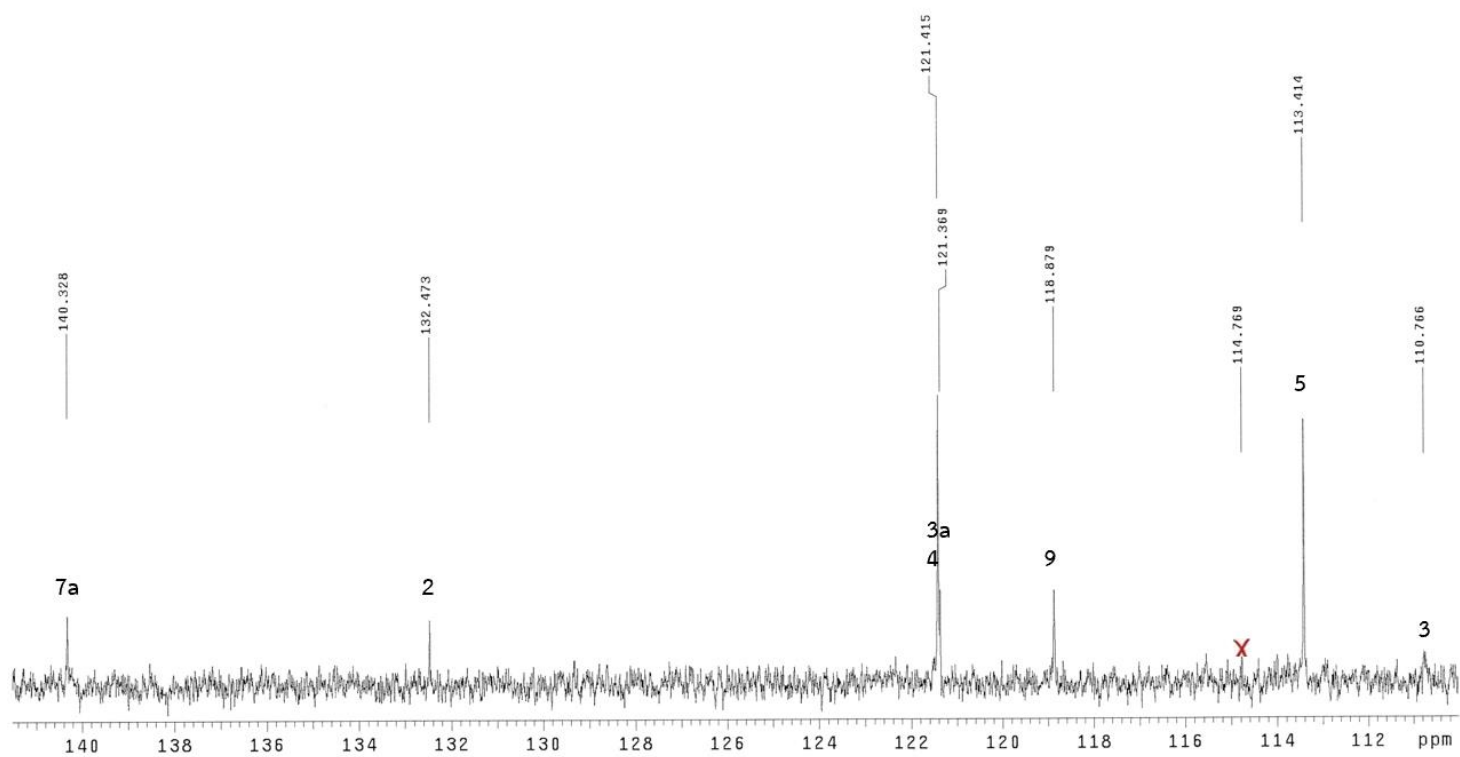

**Figure S18.** The  $^{13}\text{C}$  NMR (150 MHz,  $\text{CD}_3\text{OD}$ ) spectrum of compound 2 (continued)

8-2-9B-14-4-8

Pulse Sequence: gHSQCAD

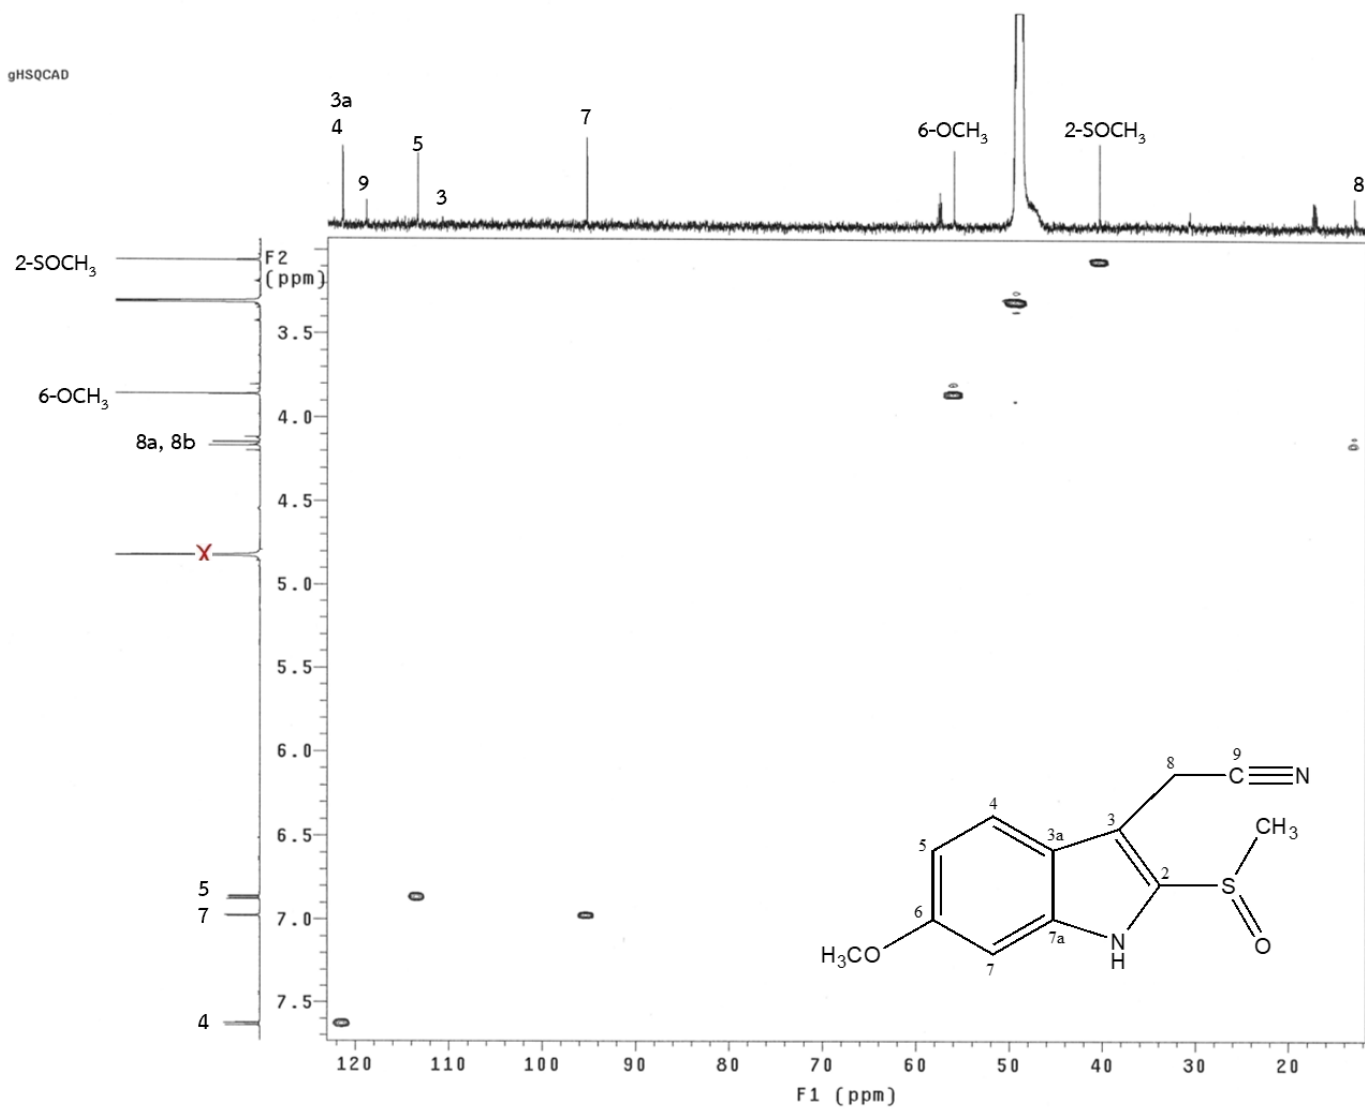

**Figure S19.** The HSQC spectrum of compound 2

8-2-9B-14-4-8

Pulse Sequence: gHMBCAD

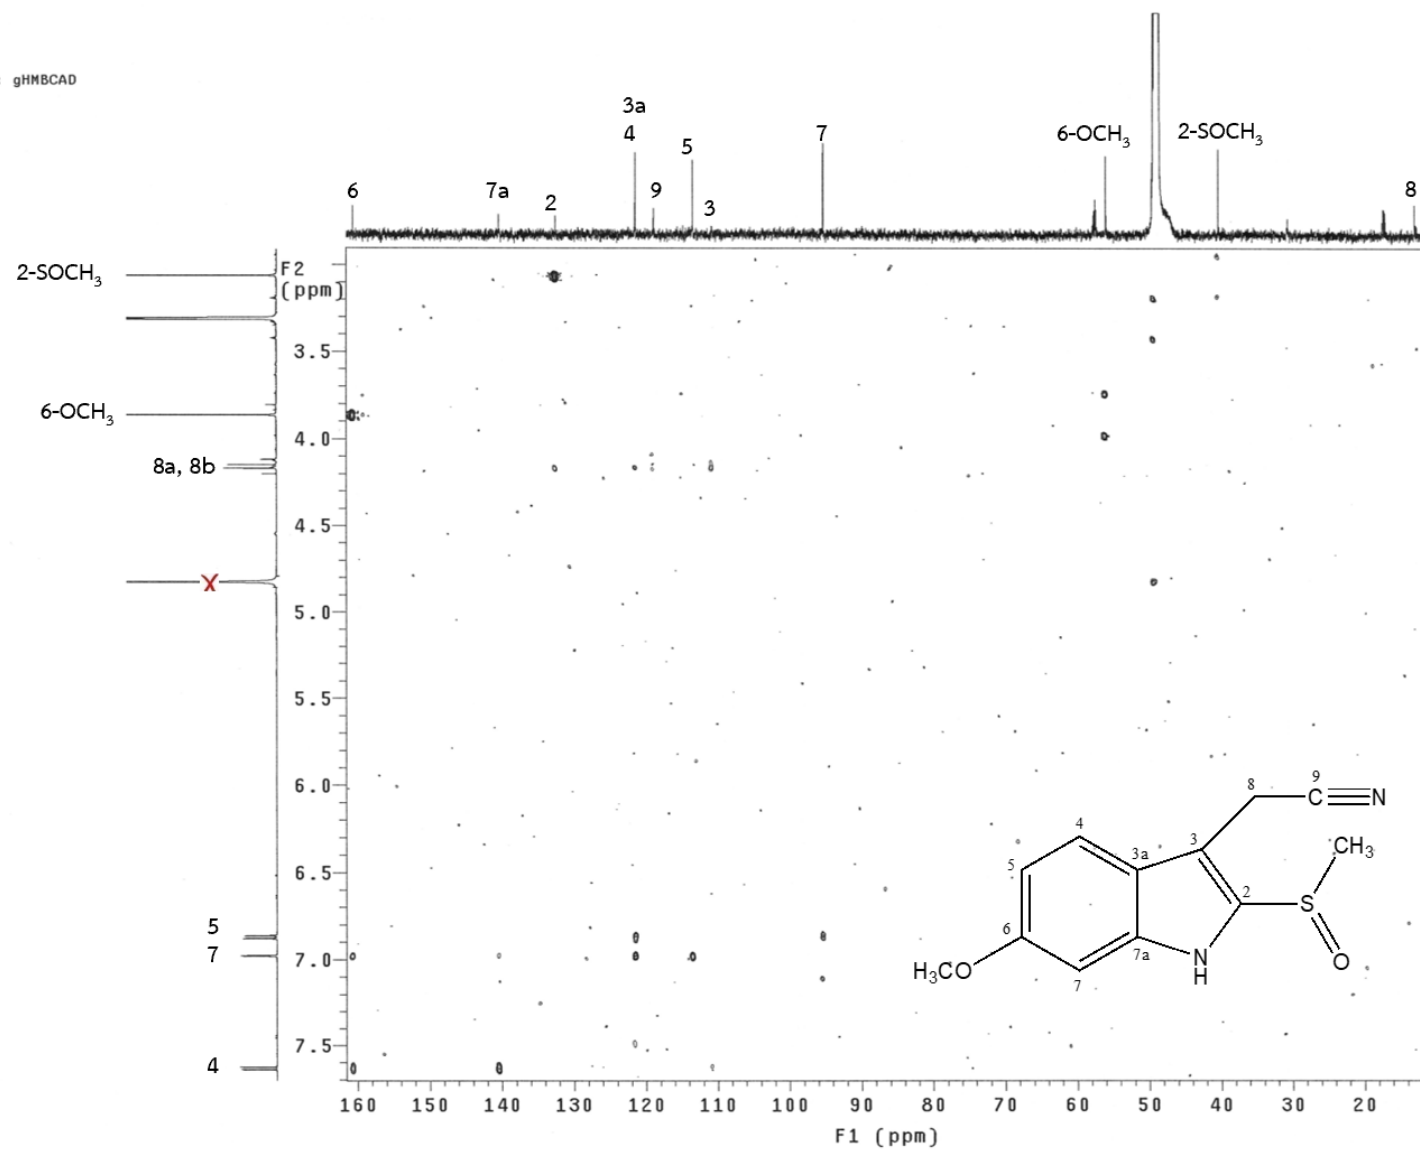

**Figure S20.** The HMBC spectrum of compound **2**



12-35-14-4-8

Pulse Sequence: gHMBCAD

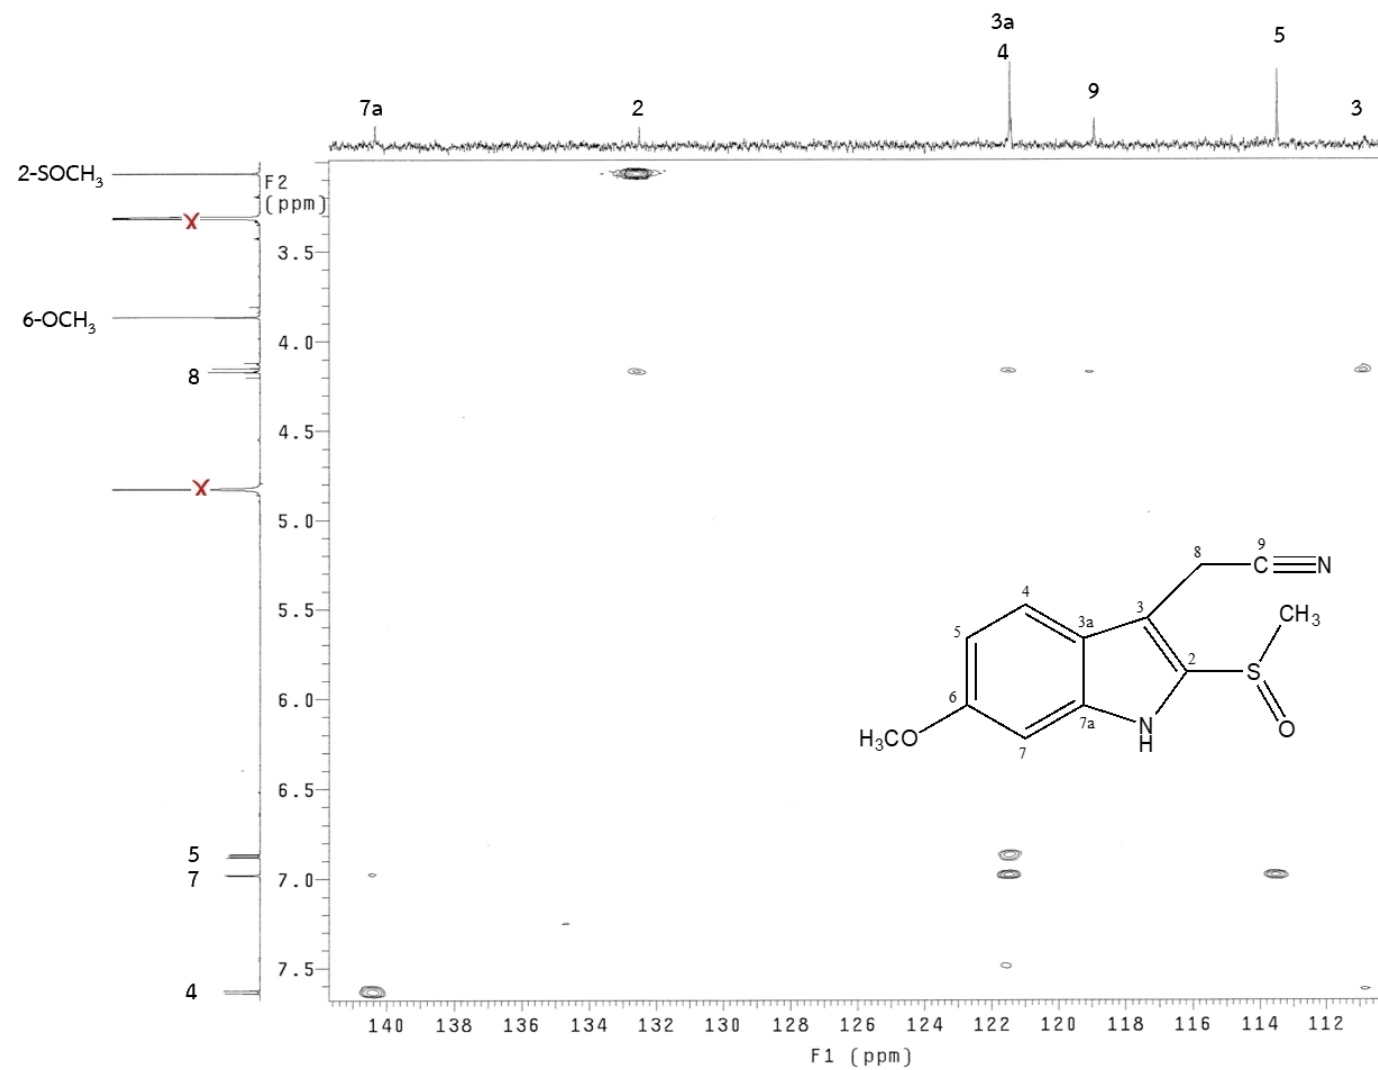

**Figure S21.** The HMBC spectrum of compound **2** (continued)

8-2-9B-14-4-8

Pulse Sequence: gCOSY

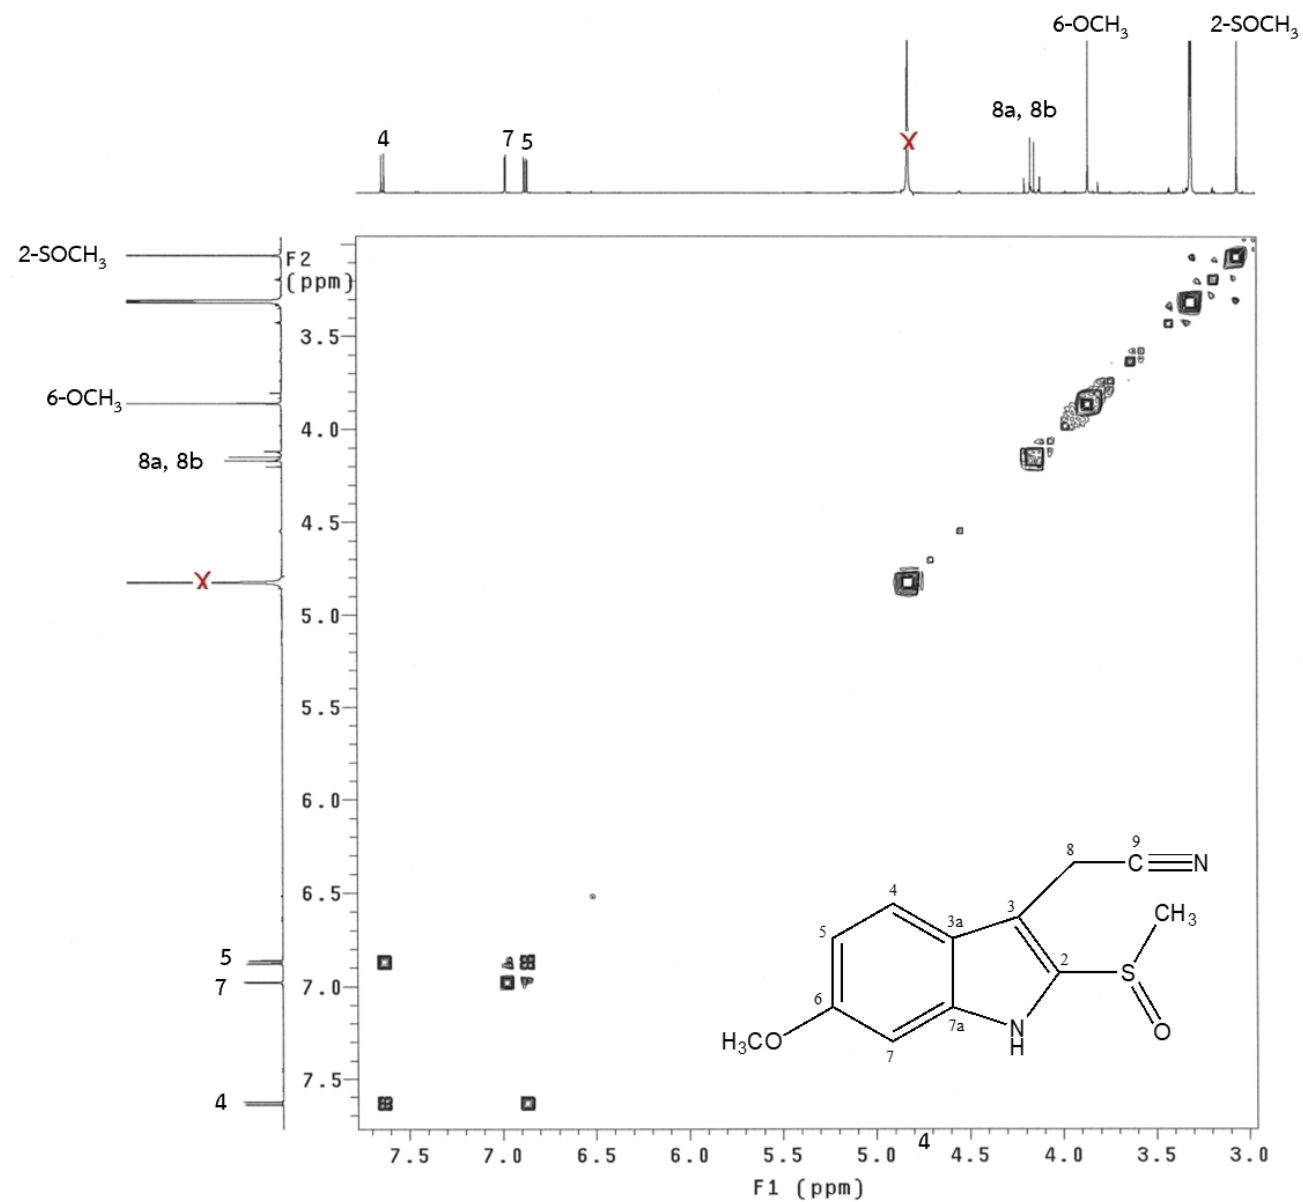

**Figure S22.** The  $^1\text{H}$ - $^1\text{H}$  COSY spectrum of compound **2**

8-2-9B-14-4-8

Pulse Sequence: NOESY

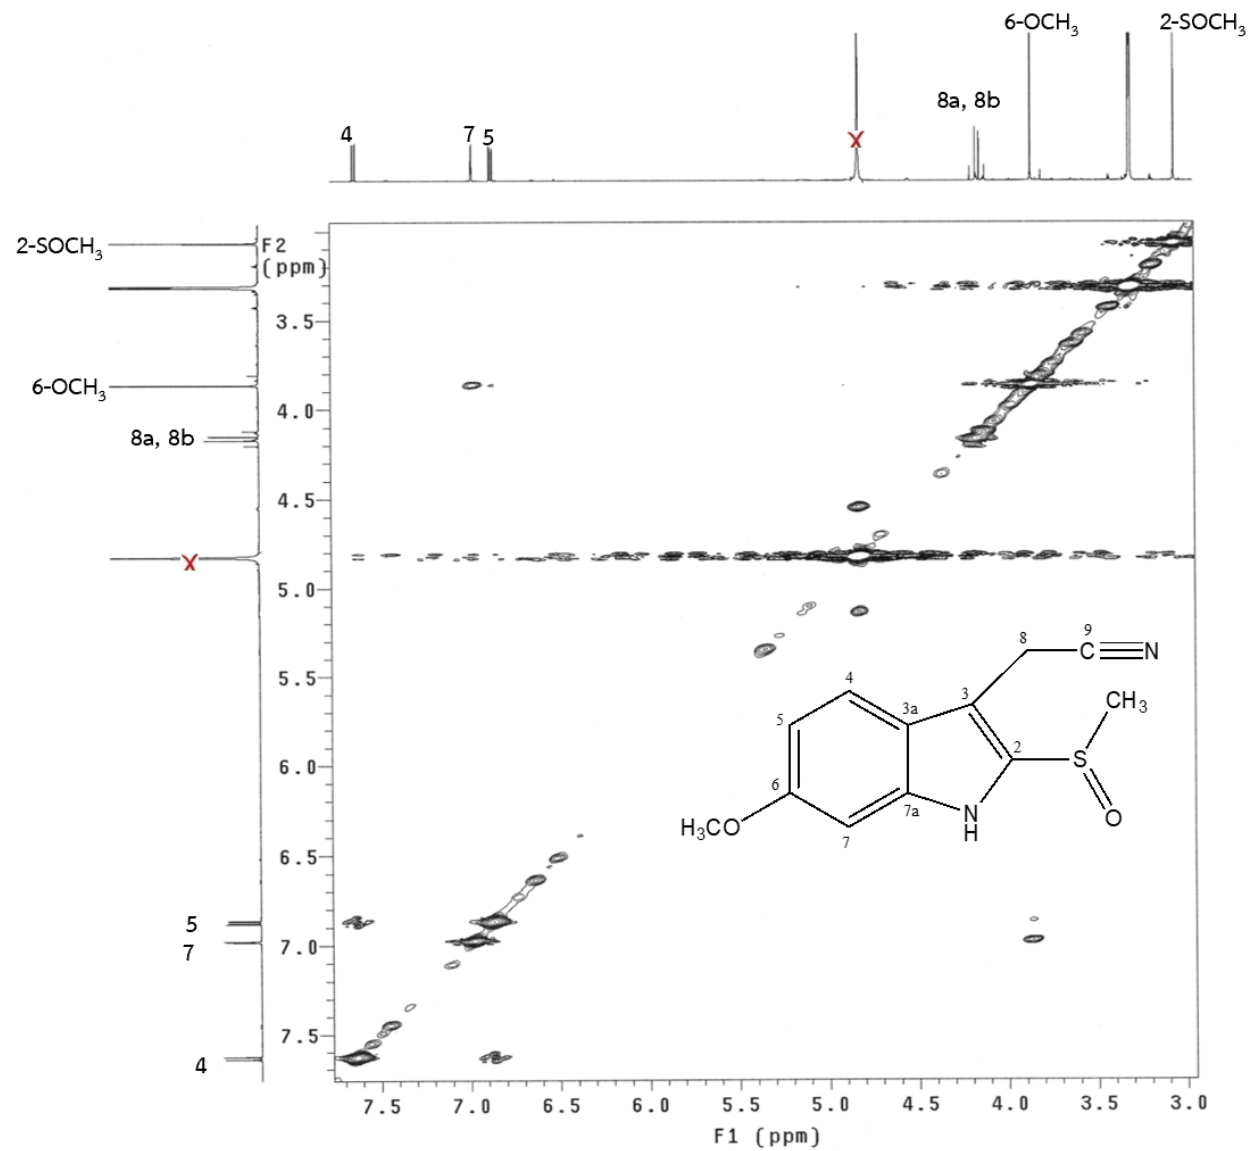

**Figure S23.** The NOESY spectrum of compound 2

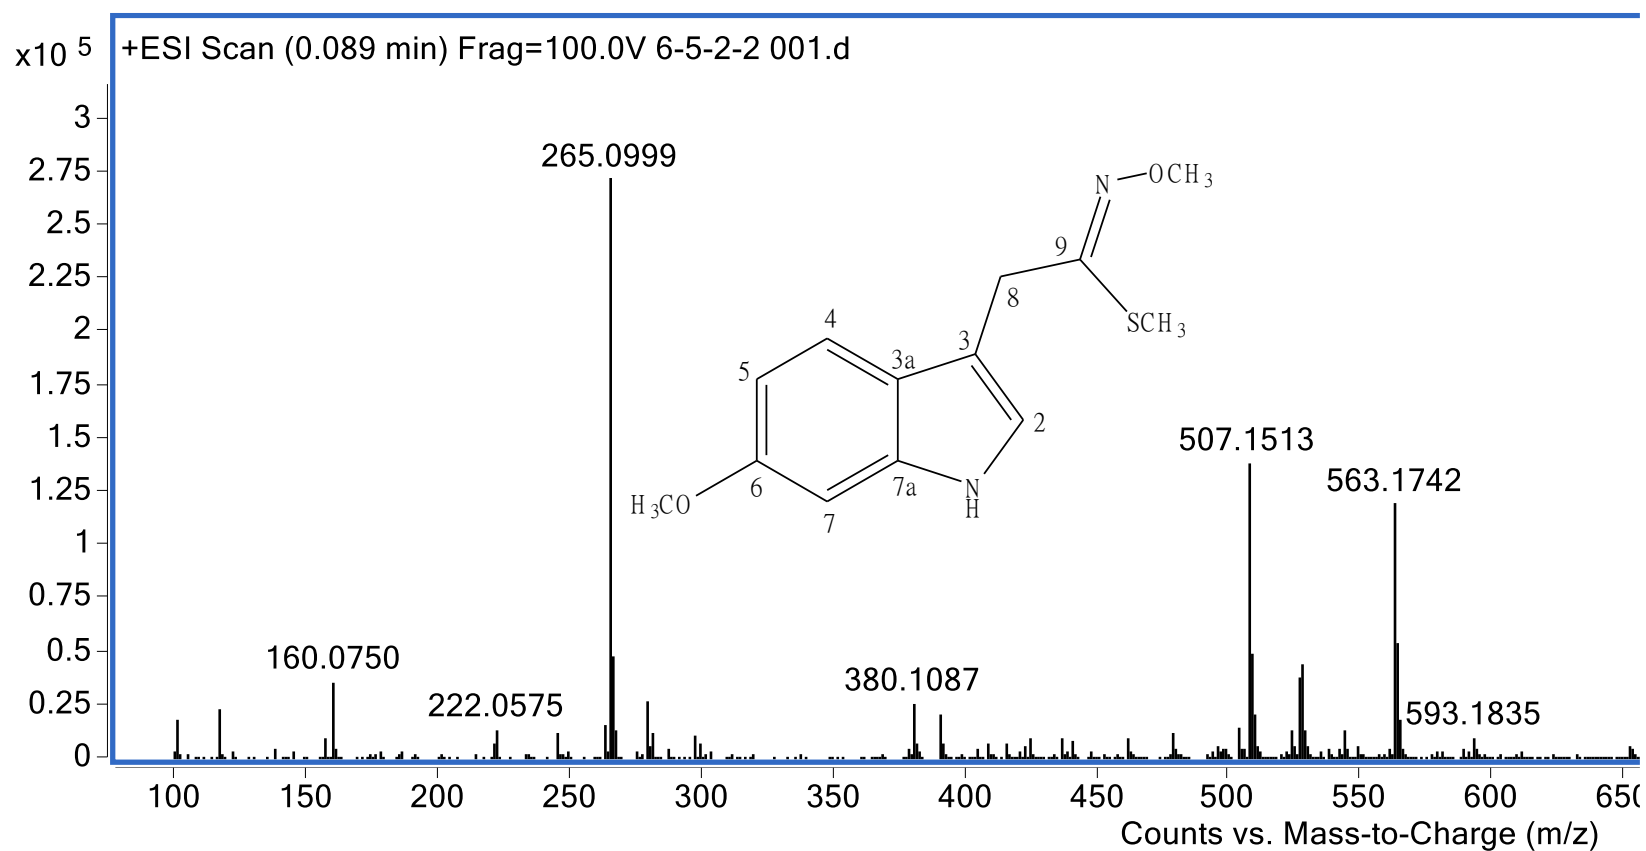

**Figure S24.** The HR-ESI-MS spectrum of compound **3**

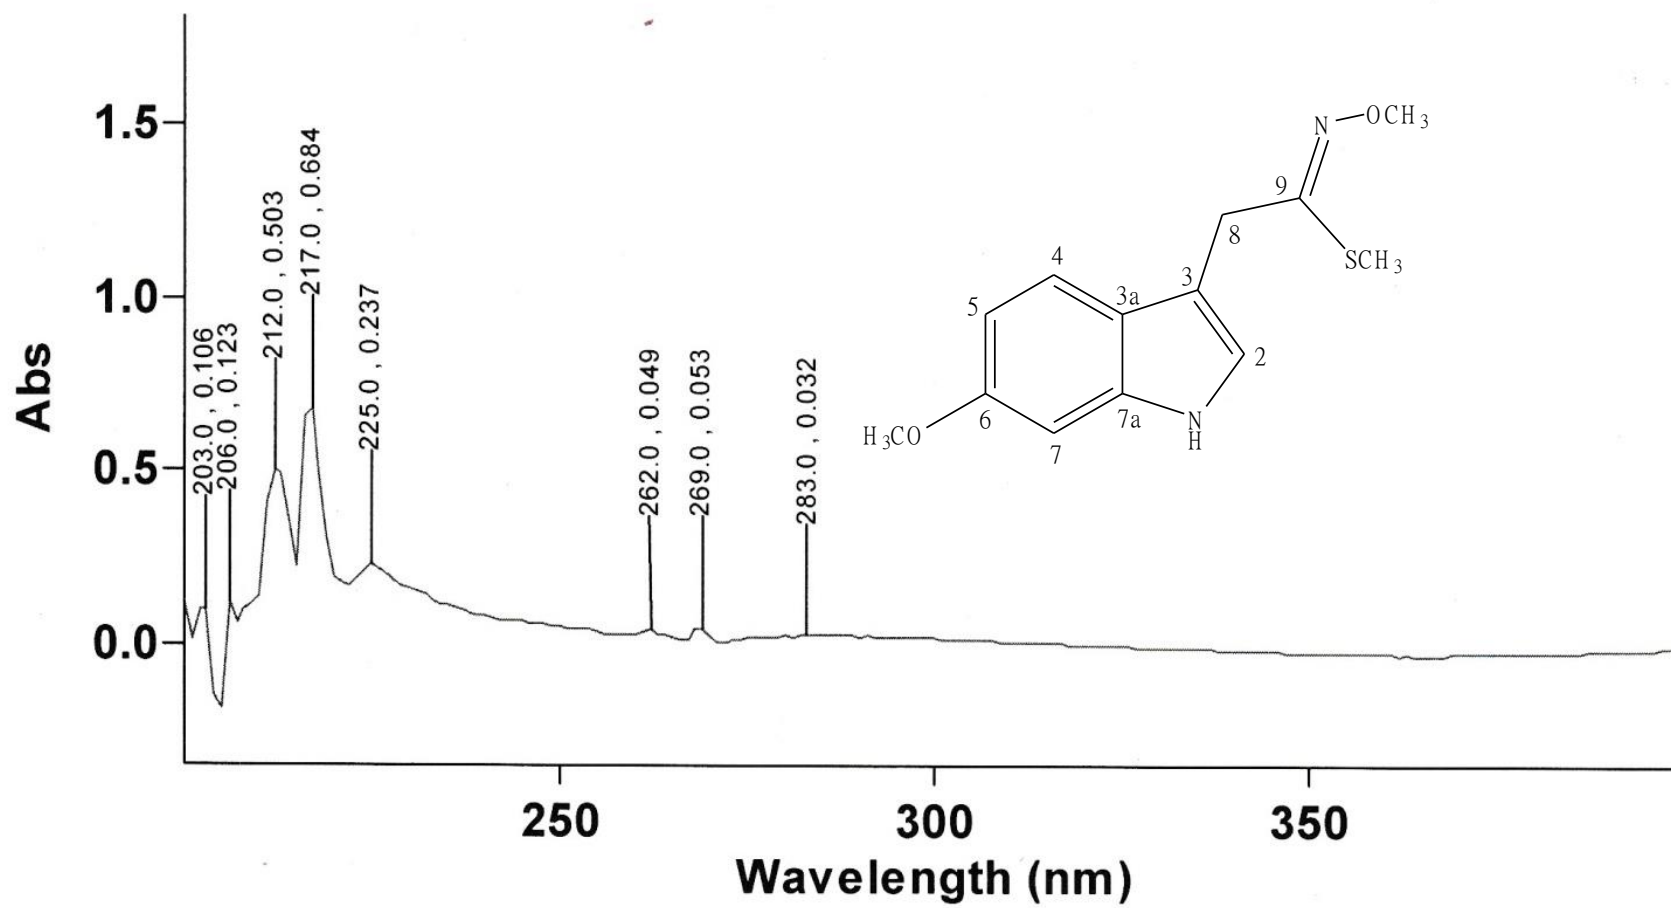

**Figure S25.** The UV spectrum of compound **3**

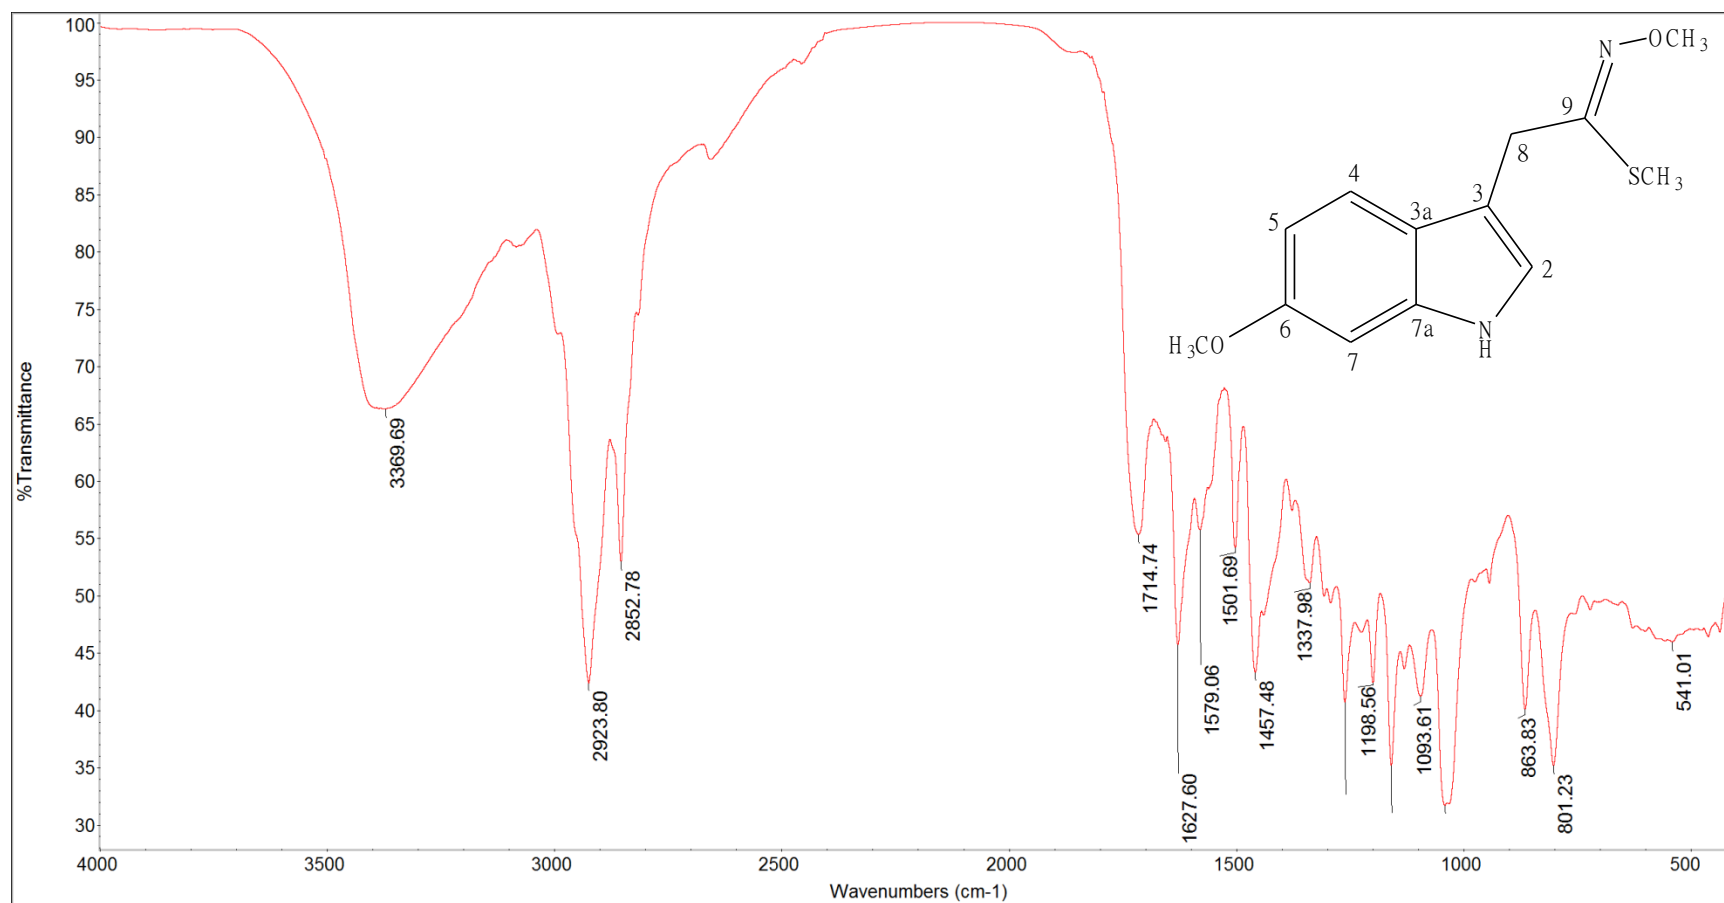

**Figure S26.** The IR spectrum of compound **3** (ATR)

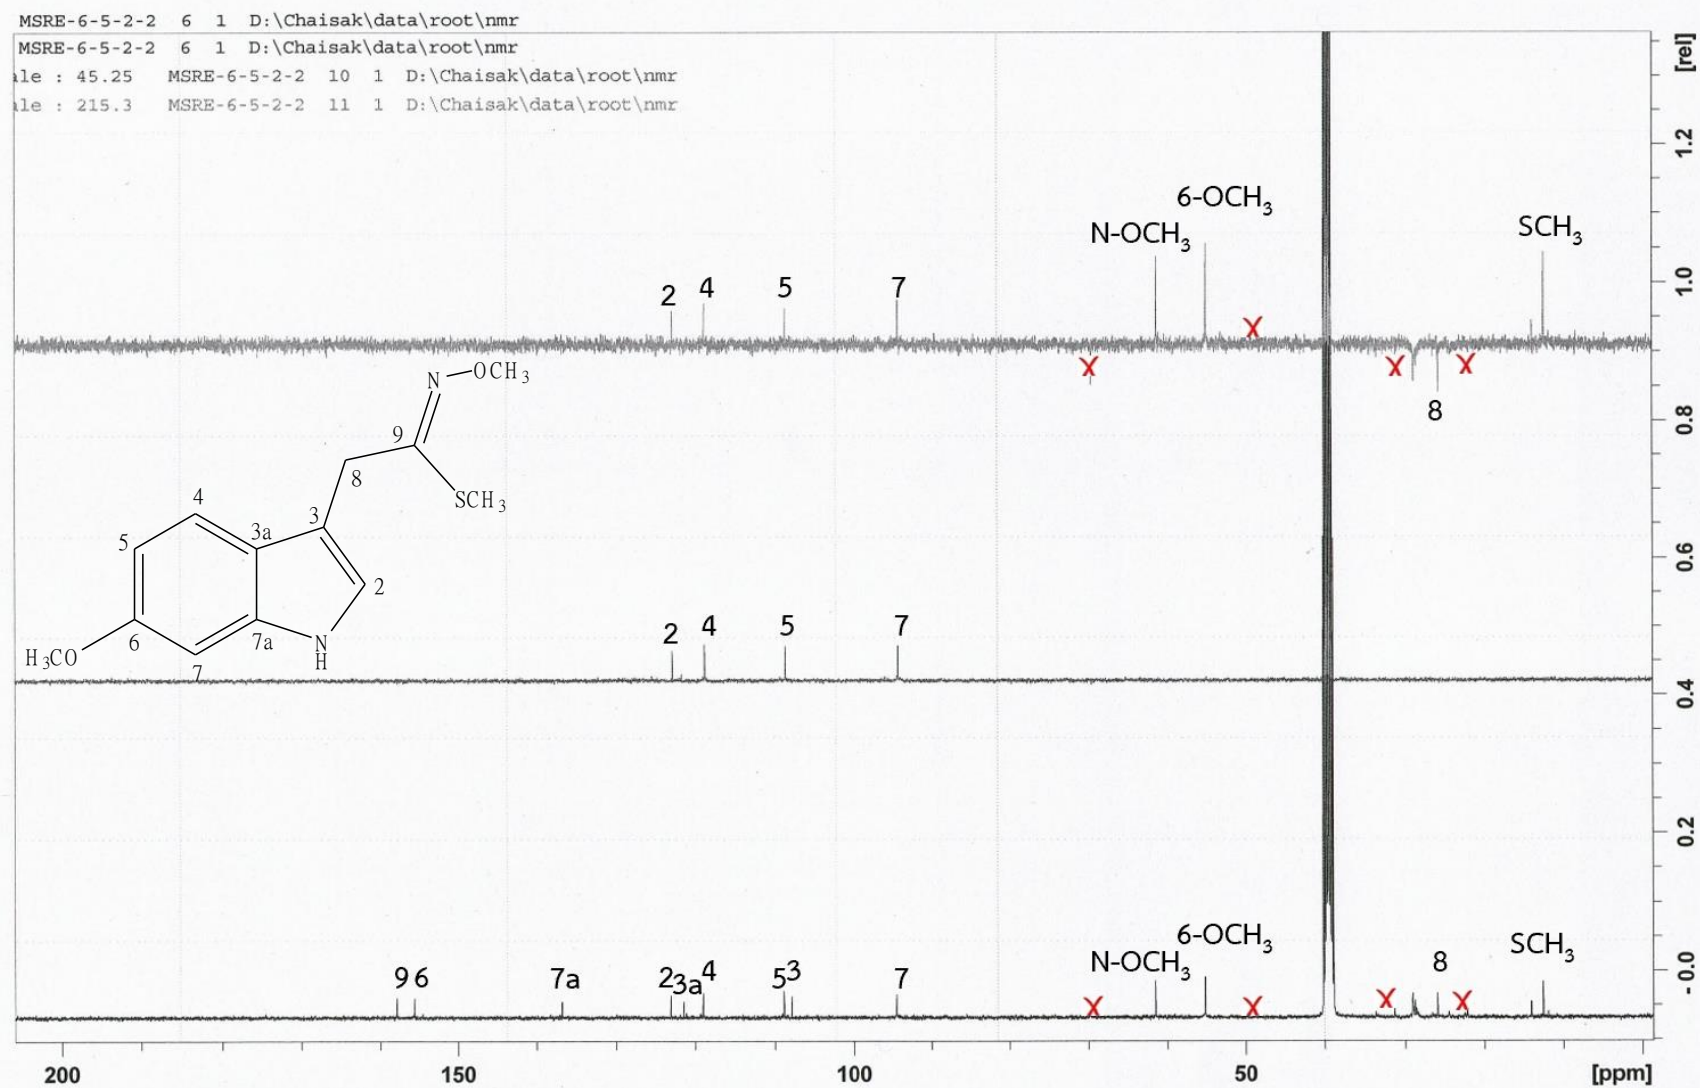

**Figure S27.** The <sup>13</sup>C-NMR, DEPT 135 and DEPT 90 (100 MHz, DMSO-*d*<sub>6</sub>) spectra of compound **3**

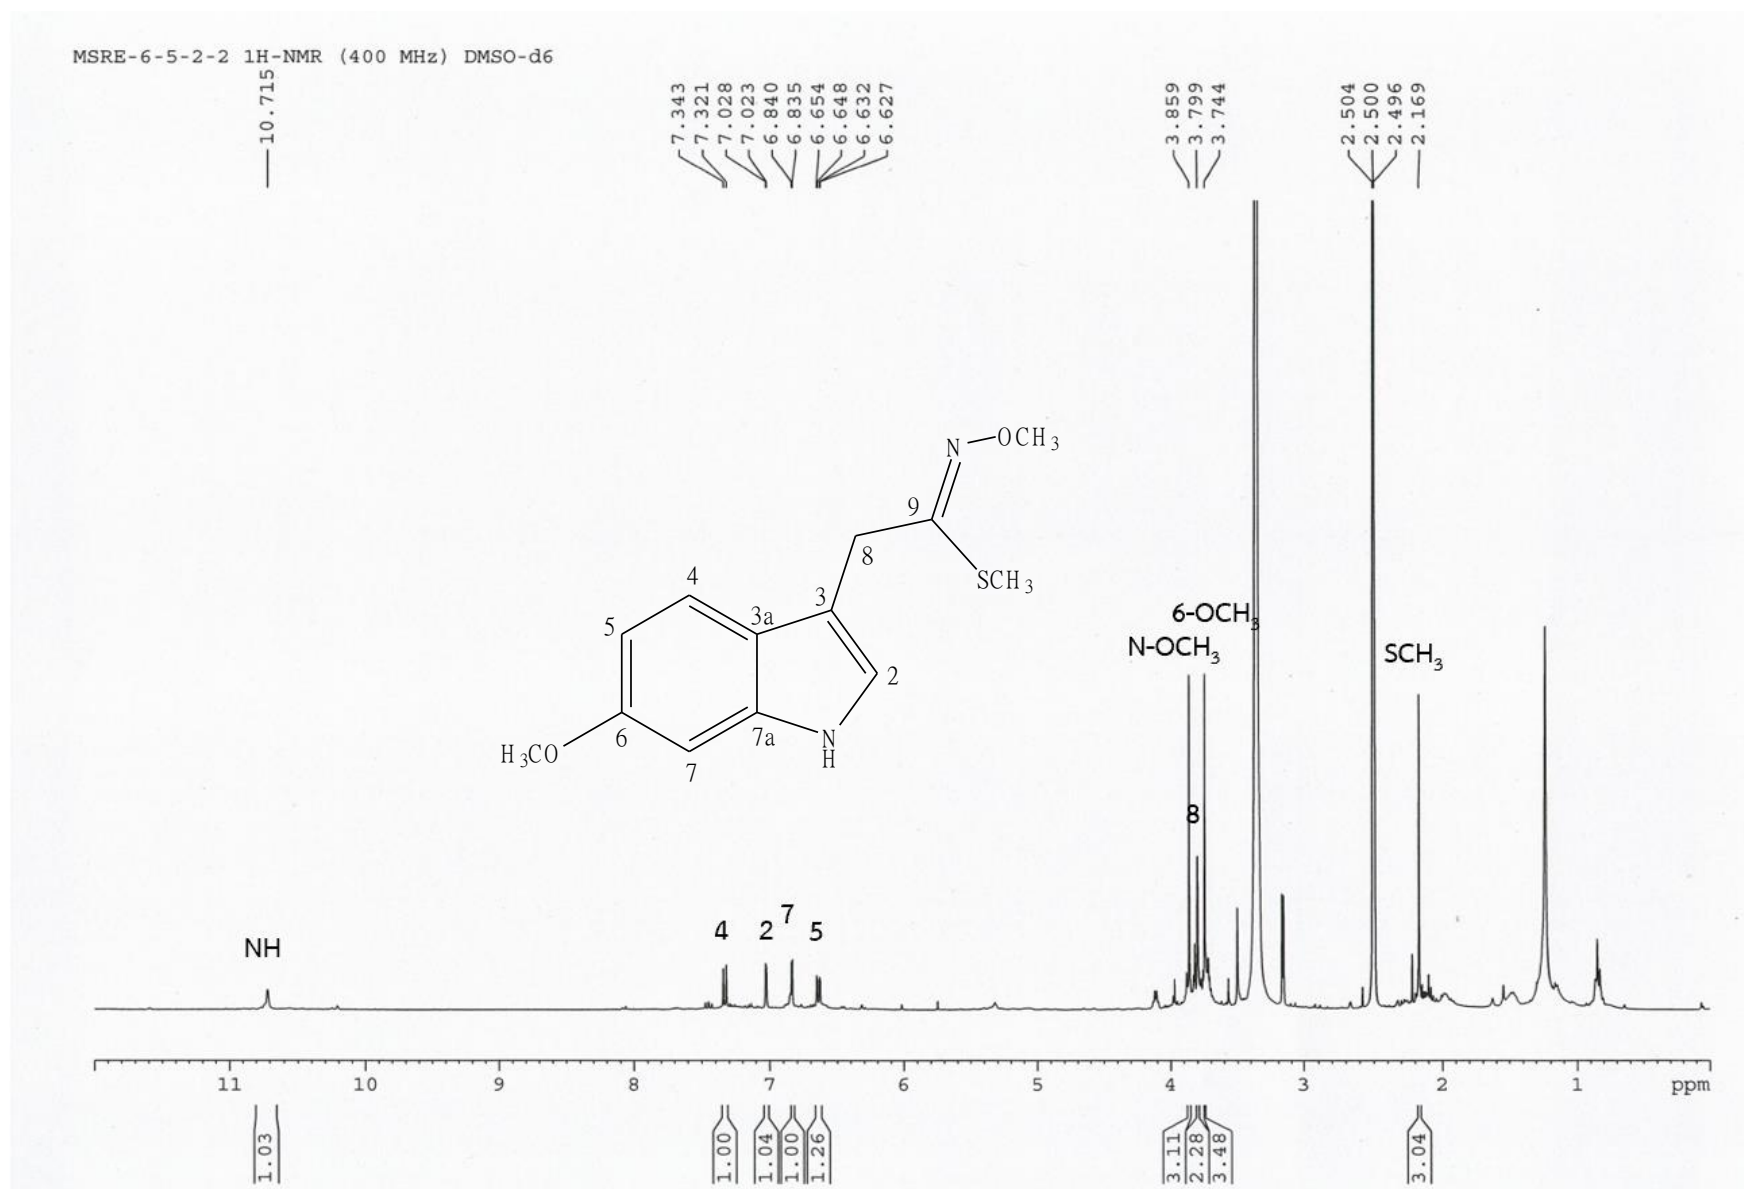

**Figure S28.** The  $^1\text{H}$  NMR (400 MHz, DMSO- $d_6$ ) spectrum of compound **3**



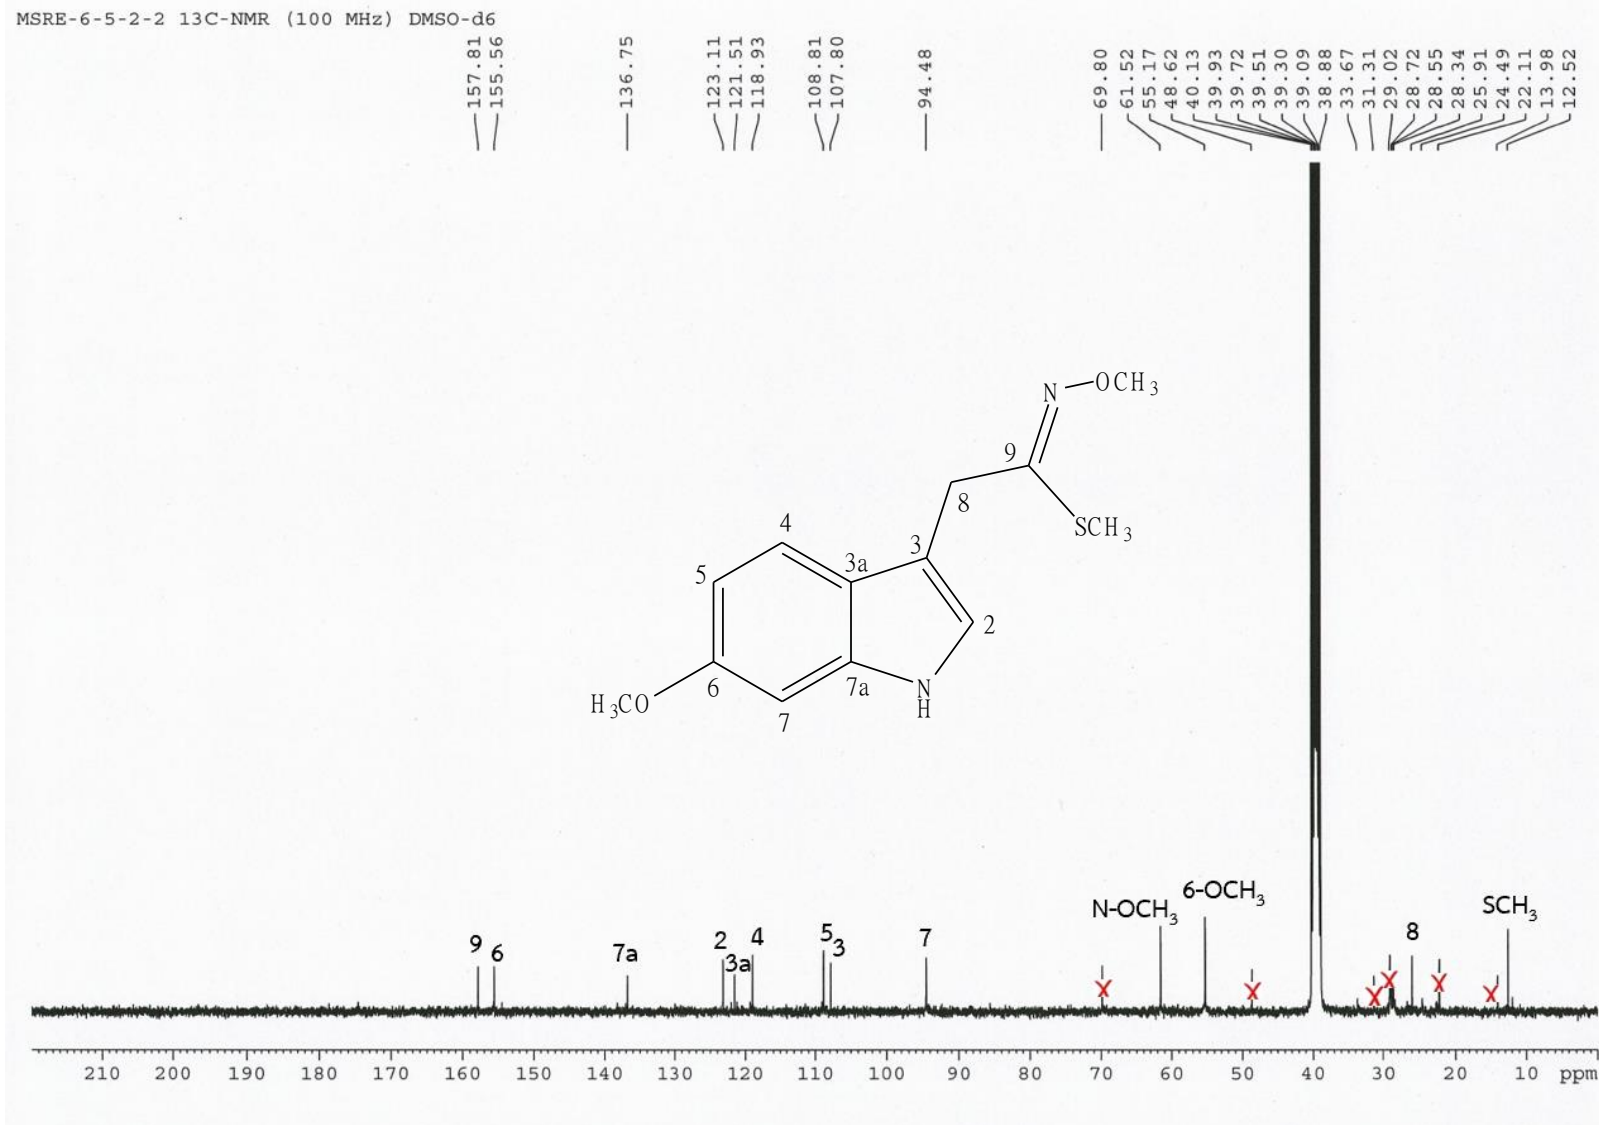

**Figure S29.** The  $^{13}\text{C}$  NMR (100 MHz, DMSO- $d_6$ ) spectrum of compound **3**

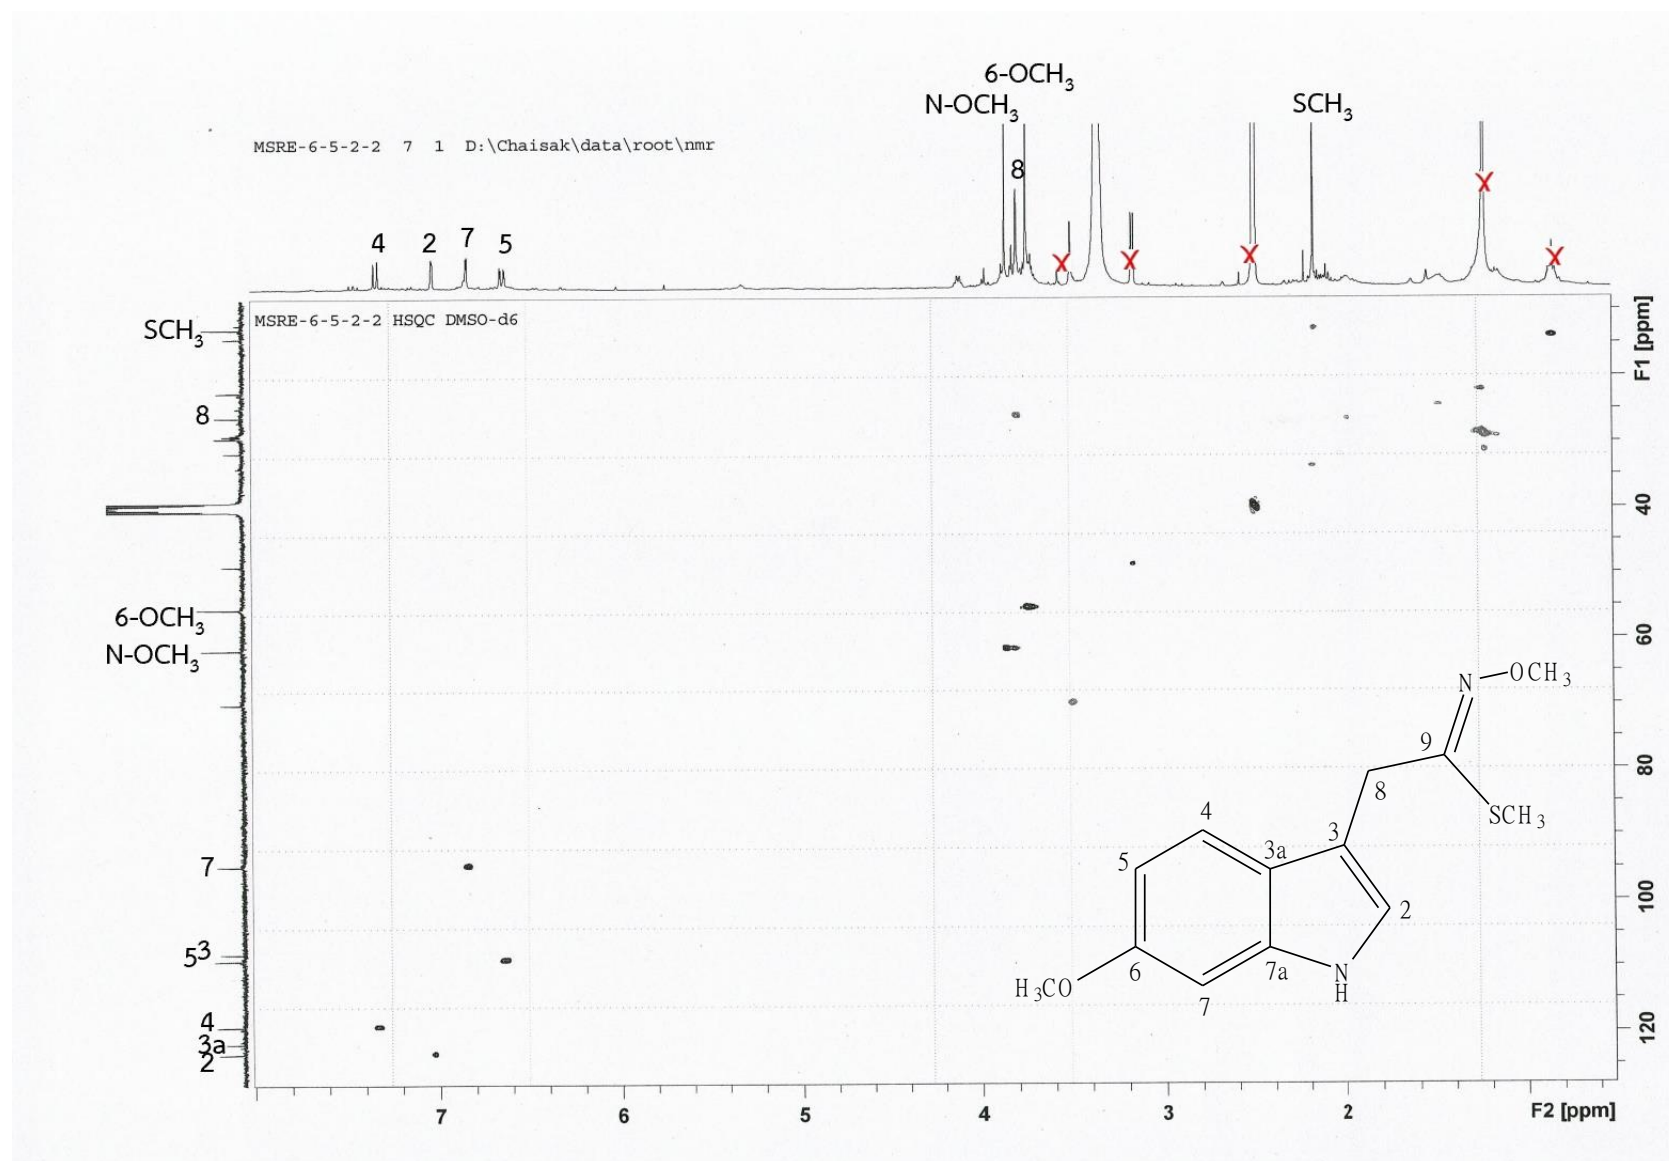

**Figure S30.** The HSQC spectrum of compound **3**

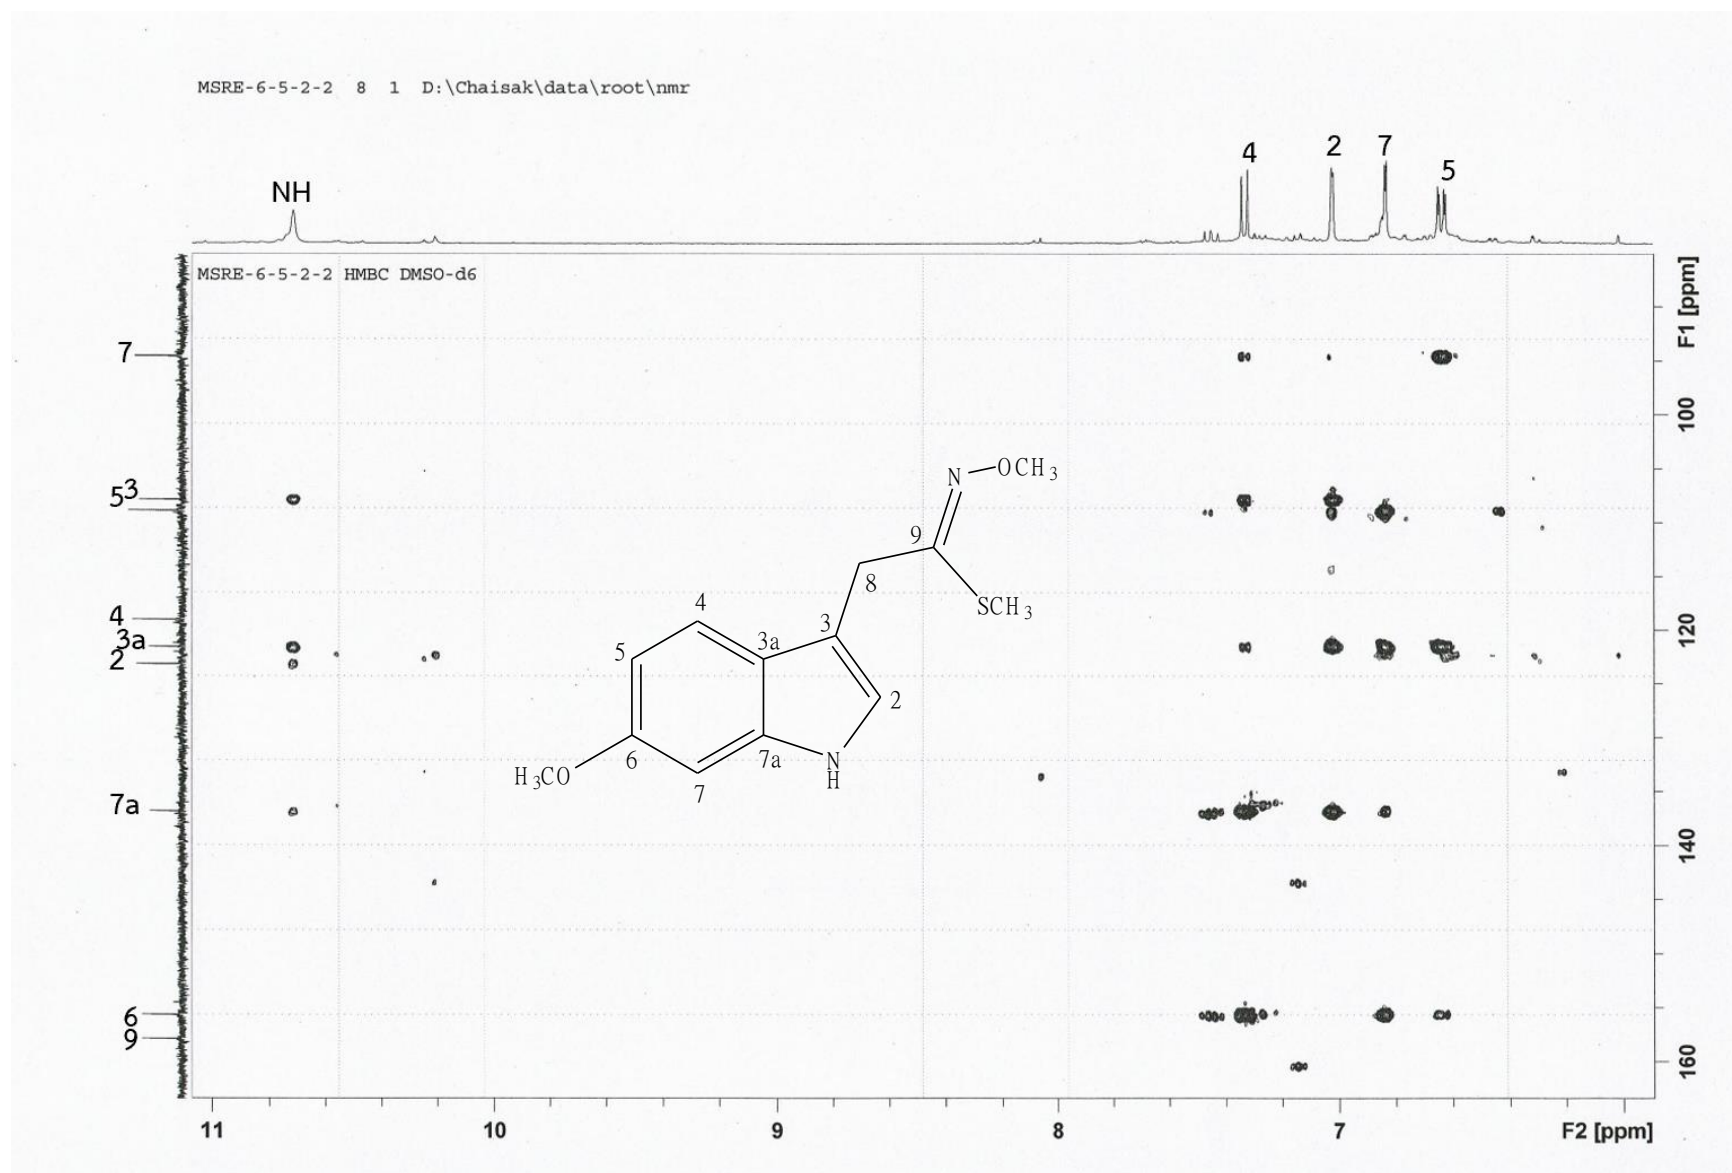

**Figure S31.** The HMBC spectrum of compound **3**

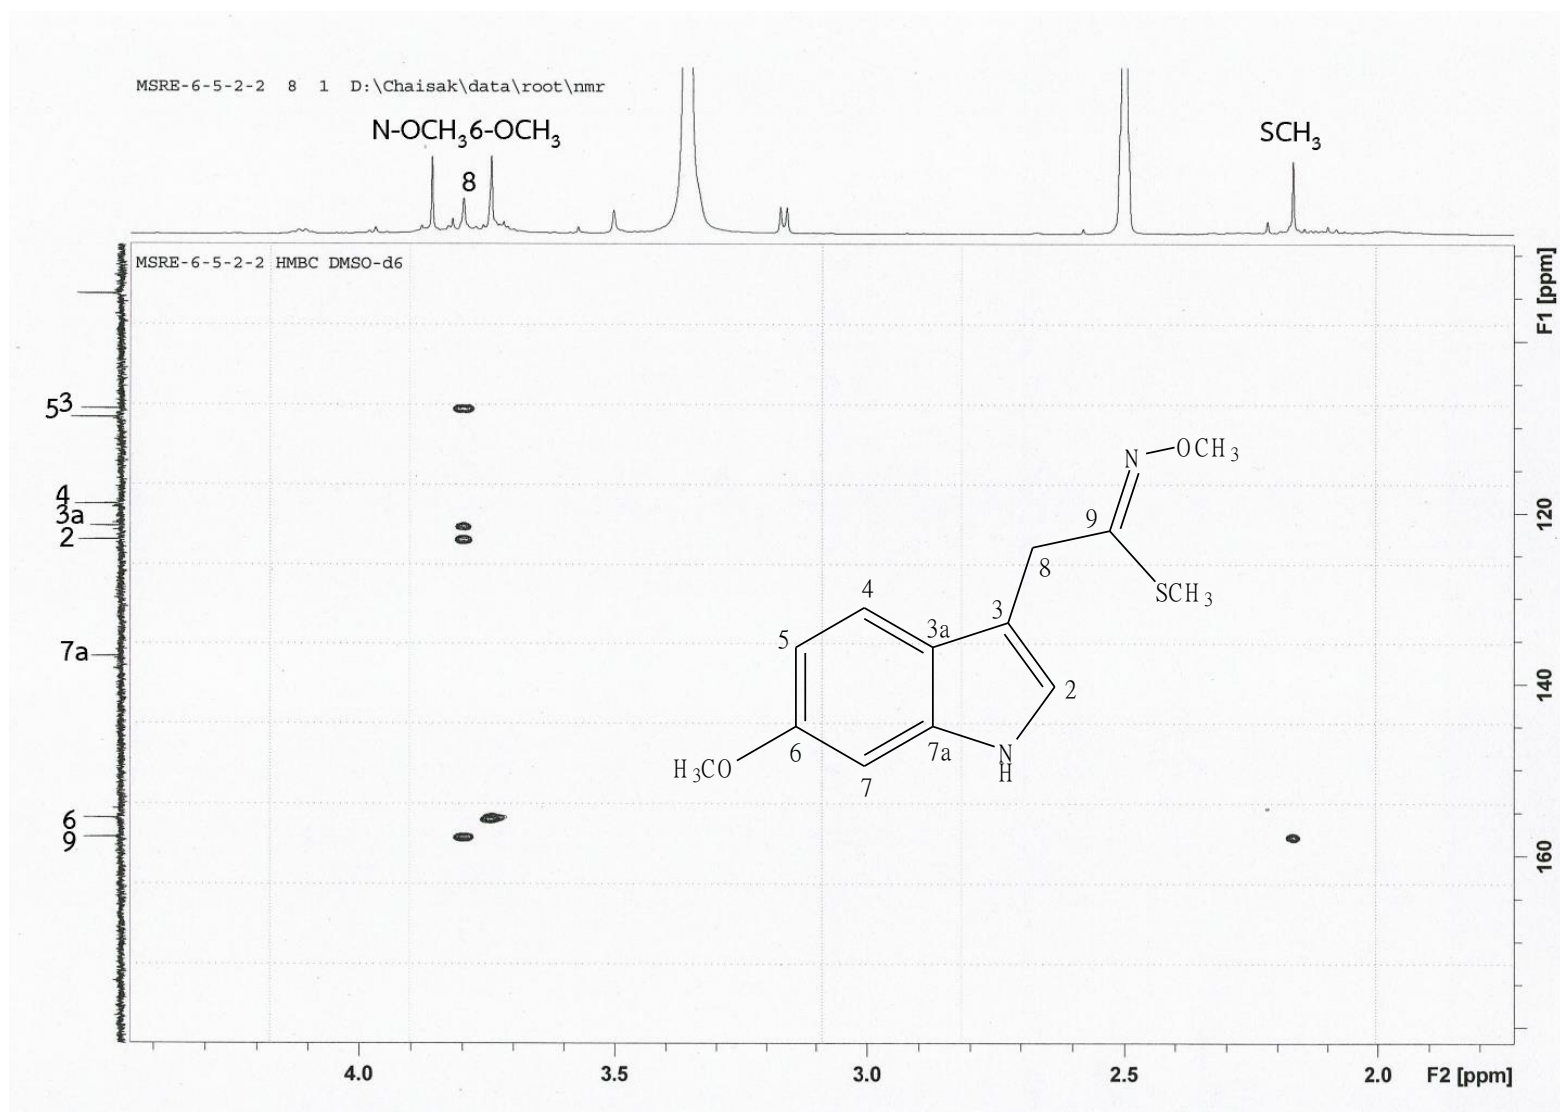

**Figure S32.** The HMBC spectrum of compound **3** (continued)

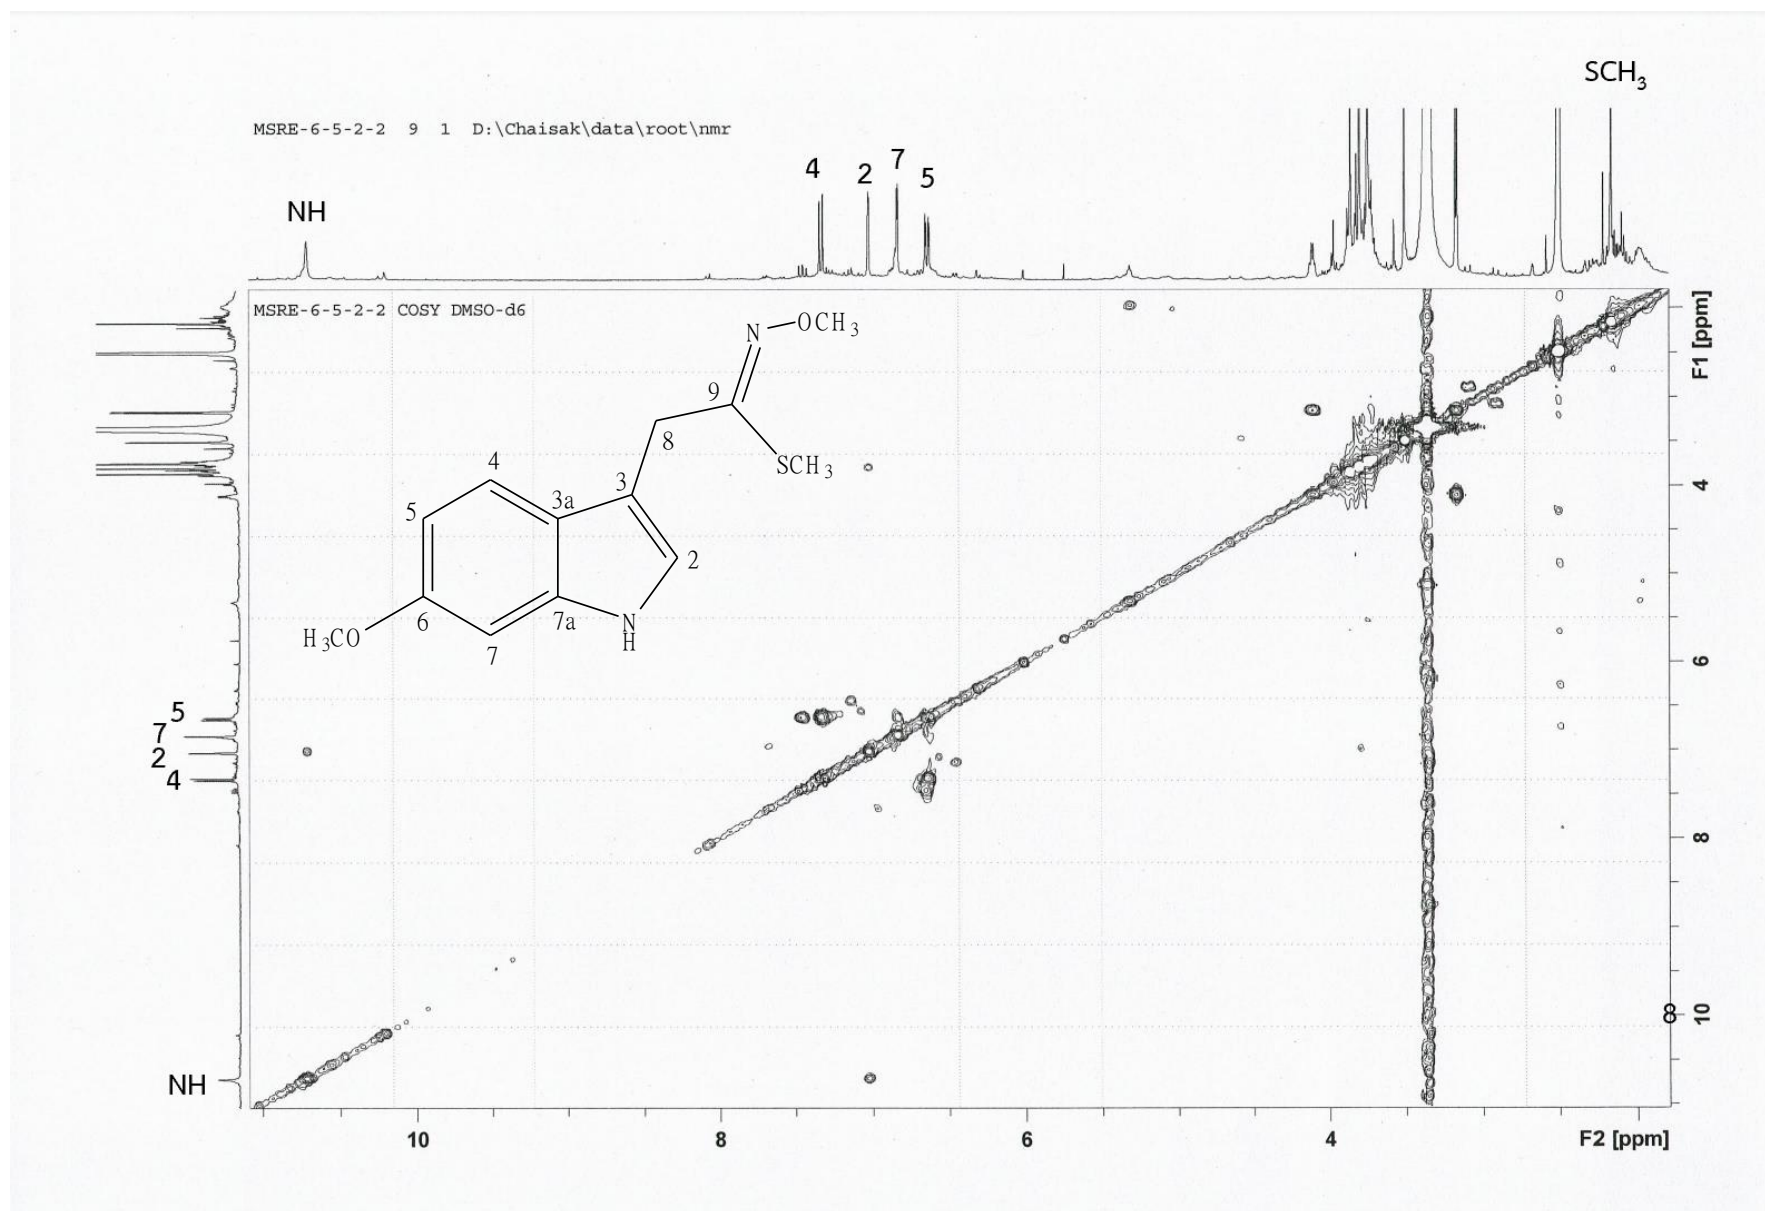

**Figure S33.** The <sup>1</sup>H-<sup>1</sup>H COSY spectrum of compound **3**



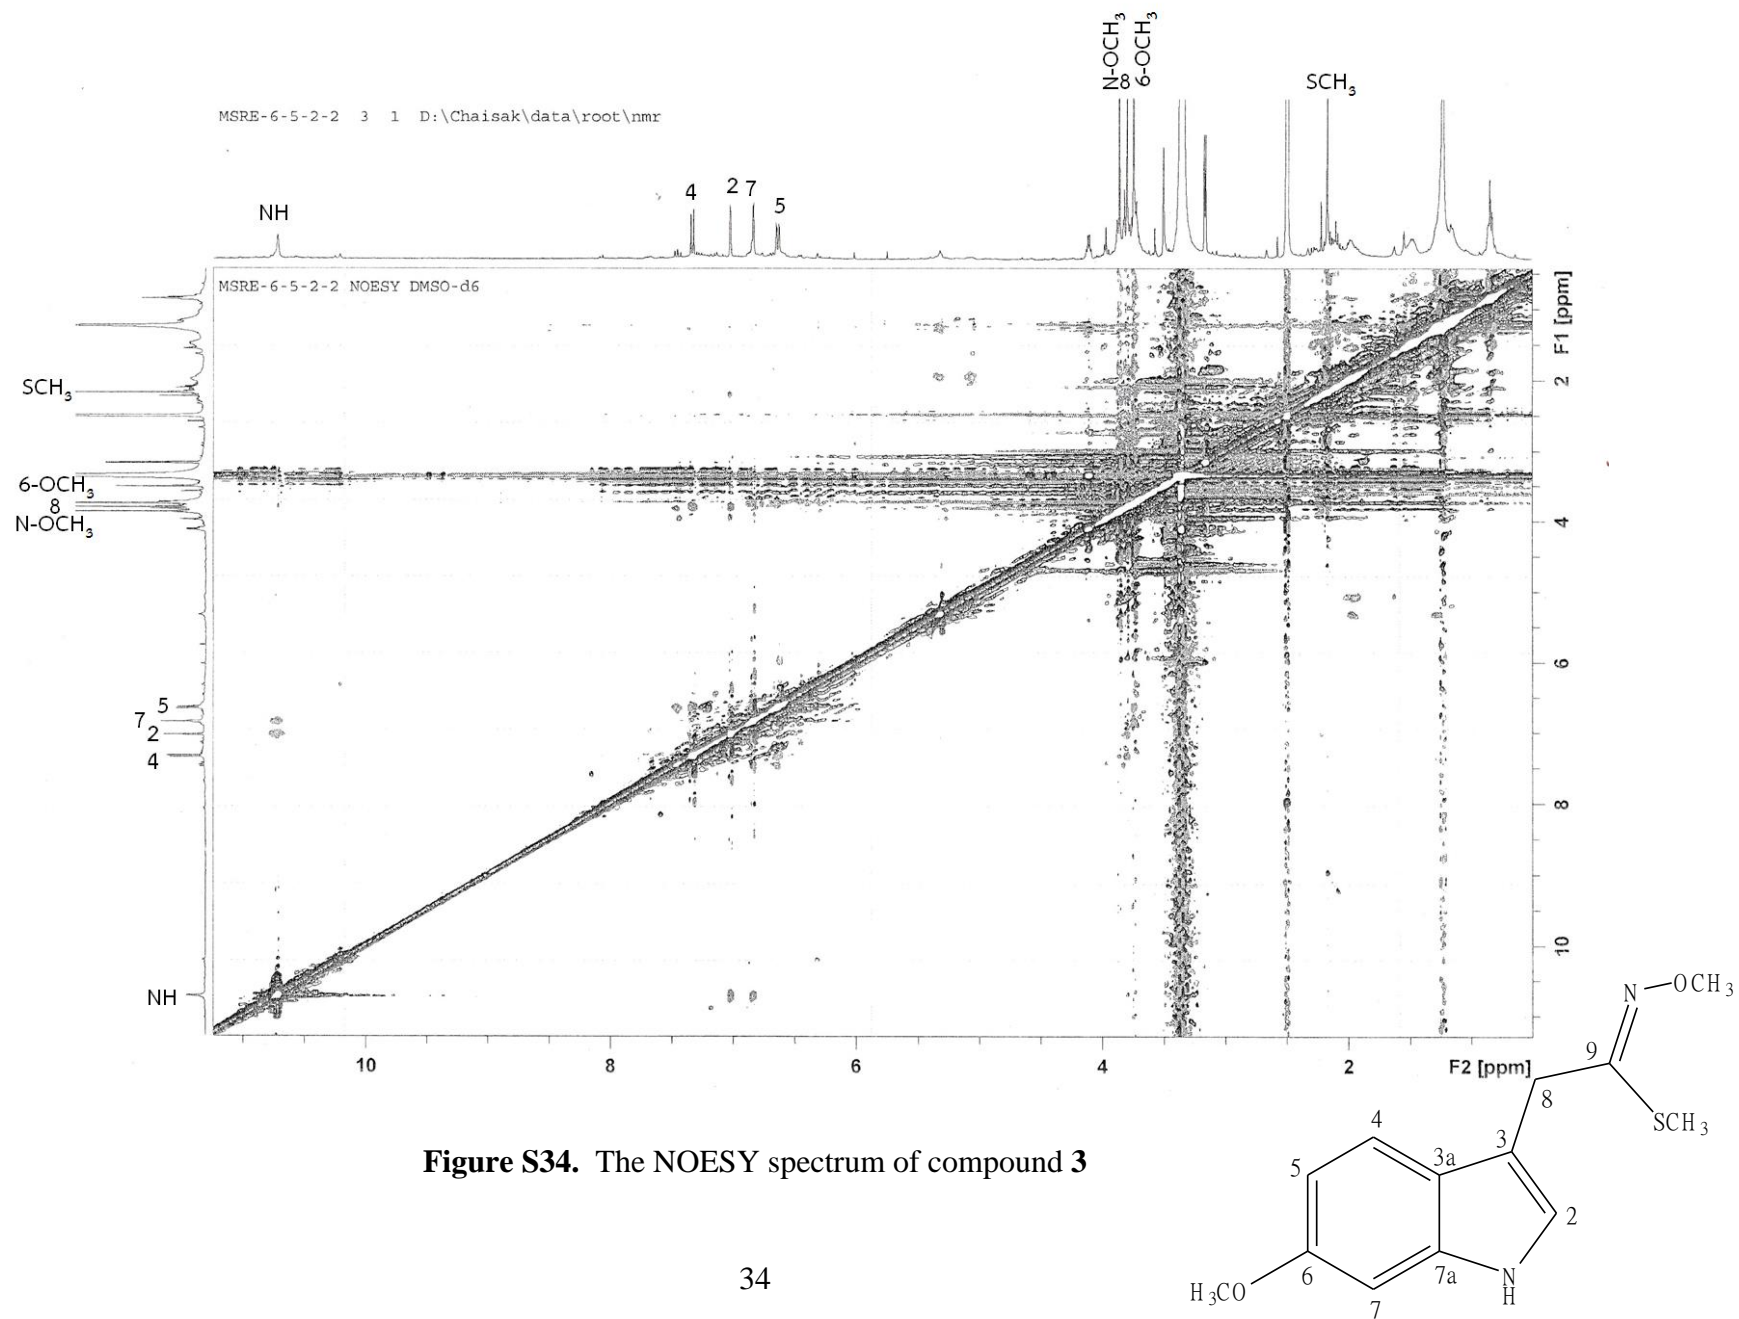

**Figure S34.** The NOESY spectrum of compound **3**

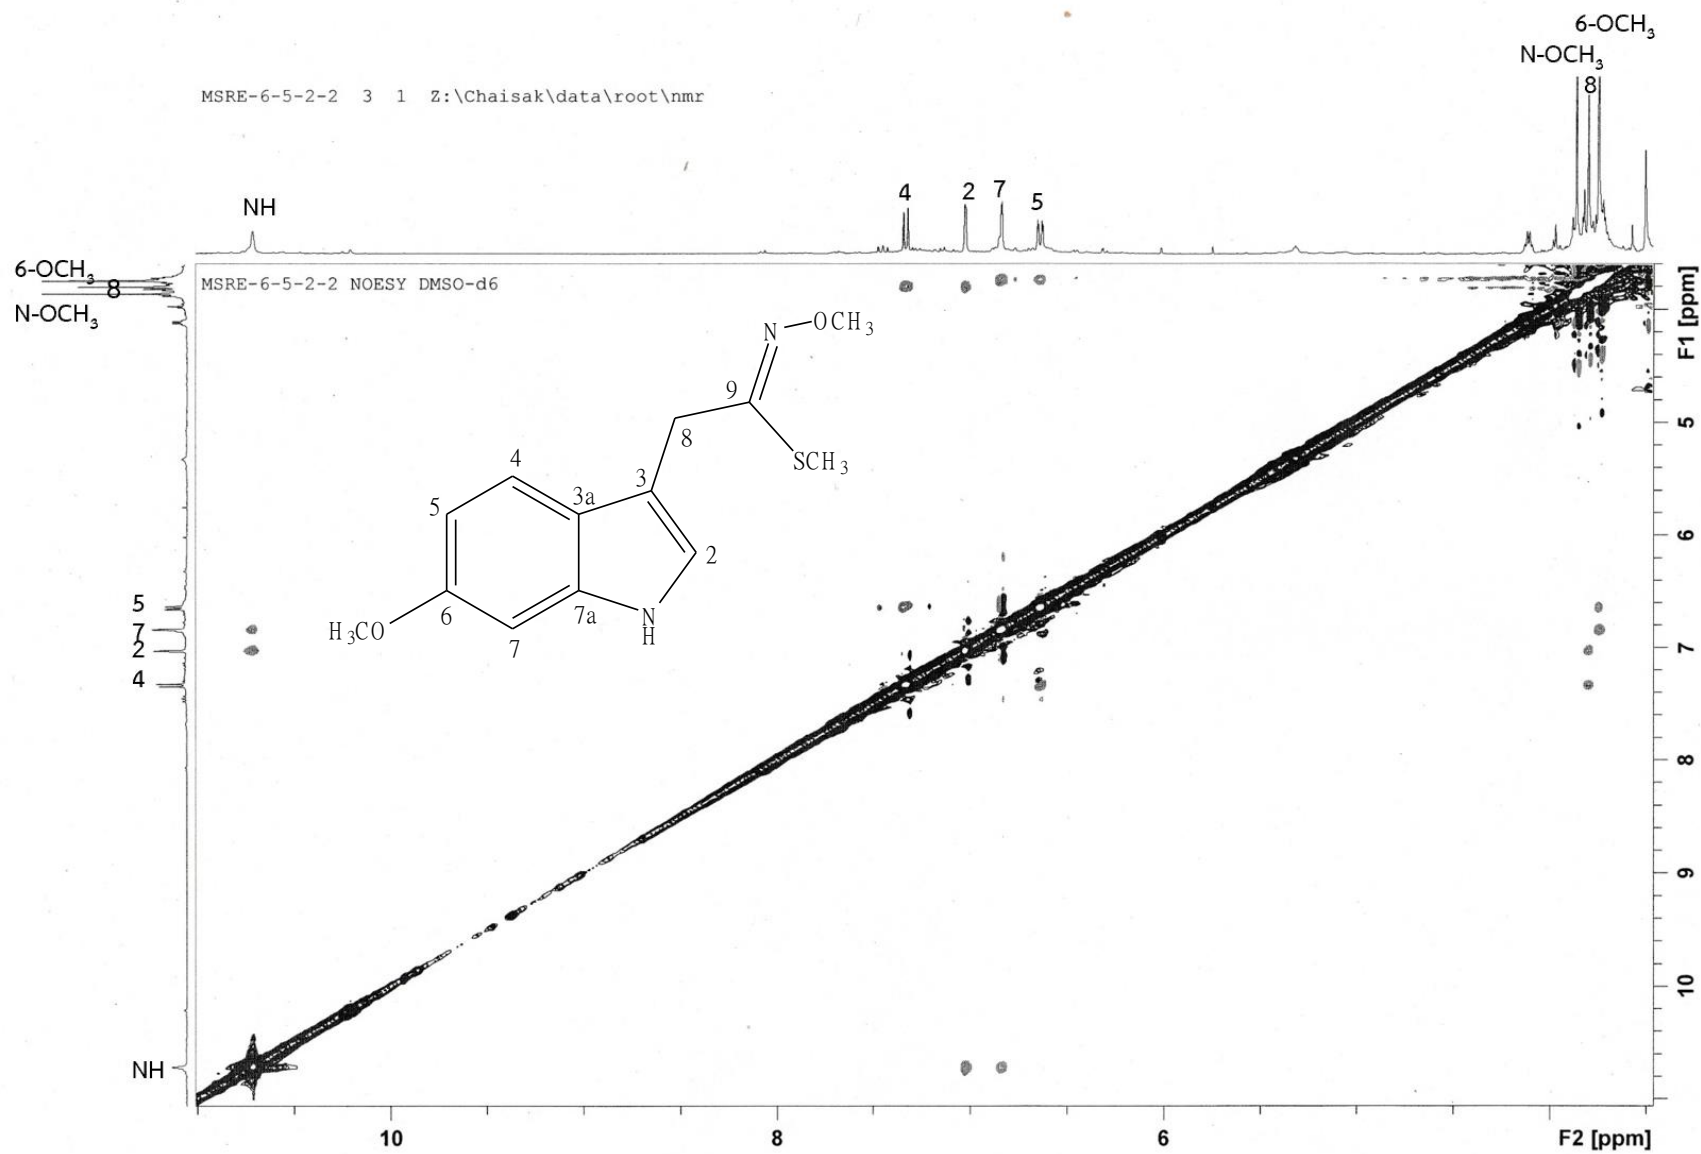

**Figure S35.** The NOESY spectrum of compound **3** (continued)

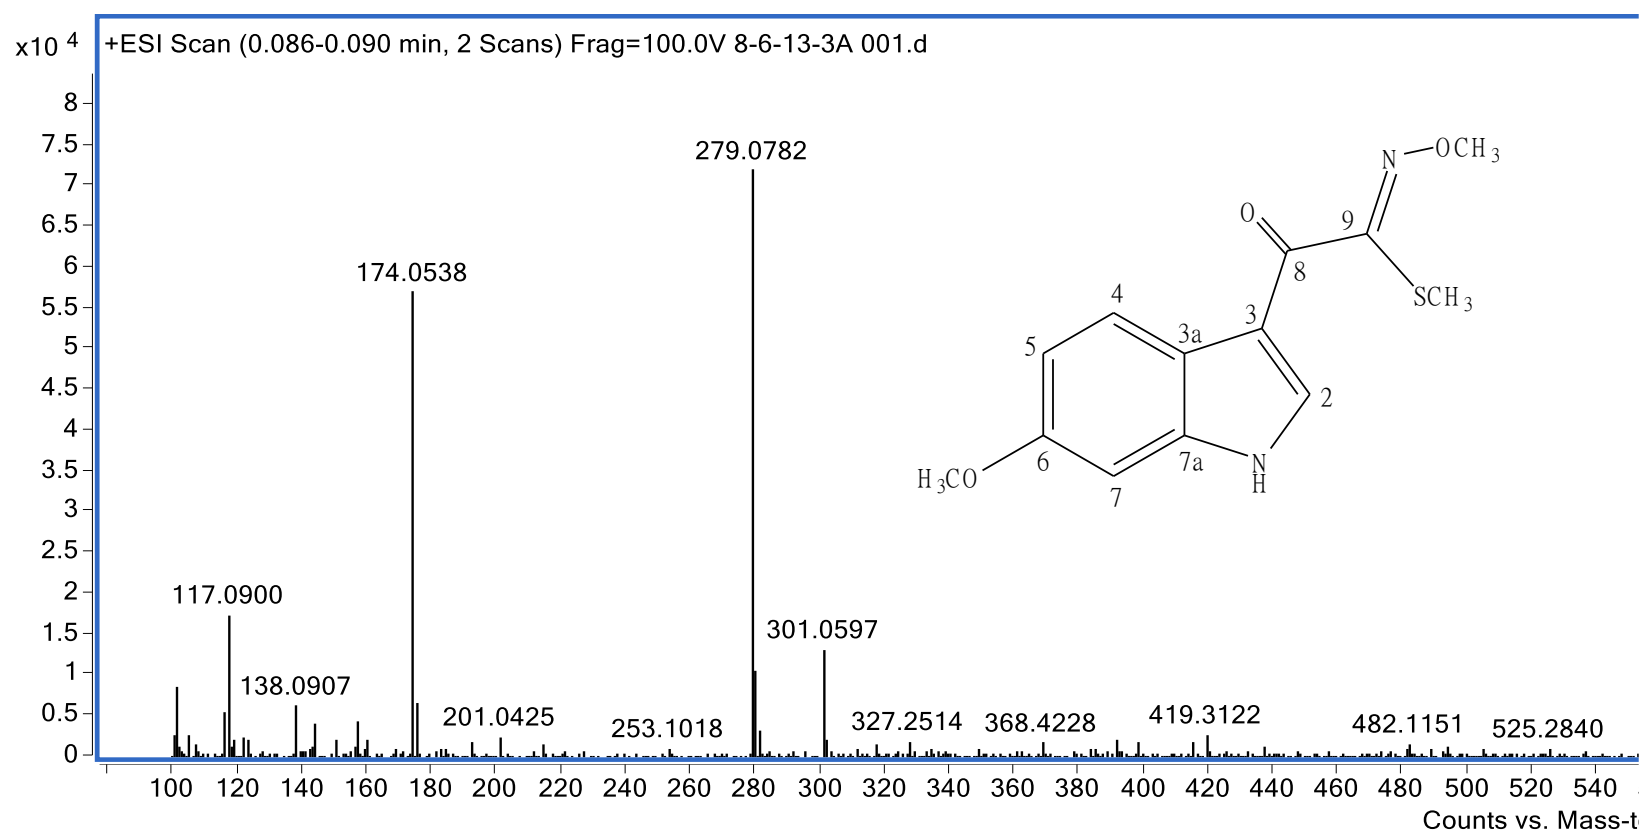

**Figure S36.** The HR-ESI-MS spectrum of compound **4**



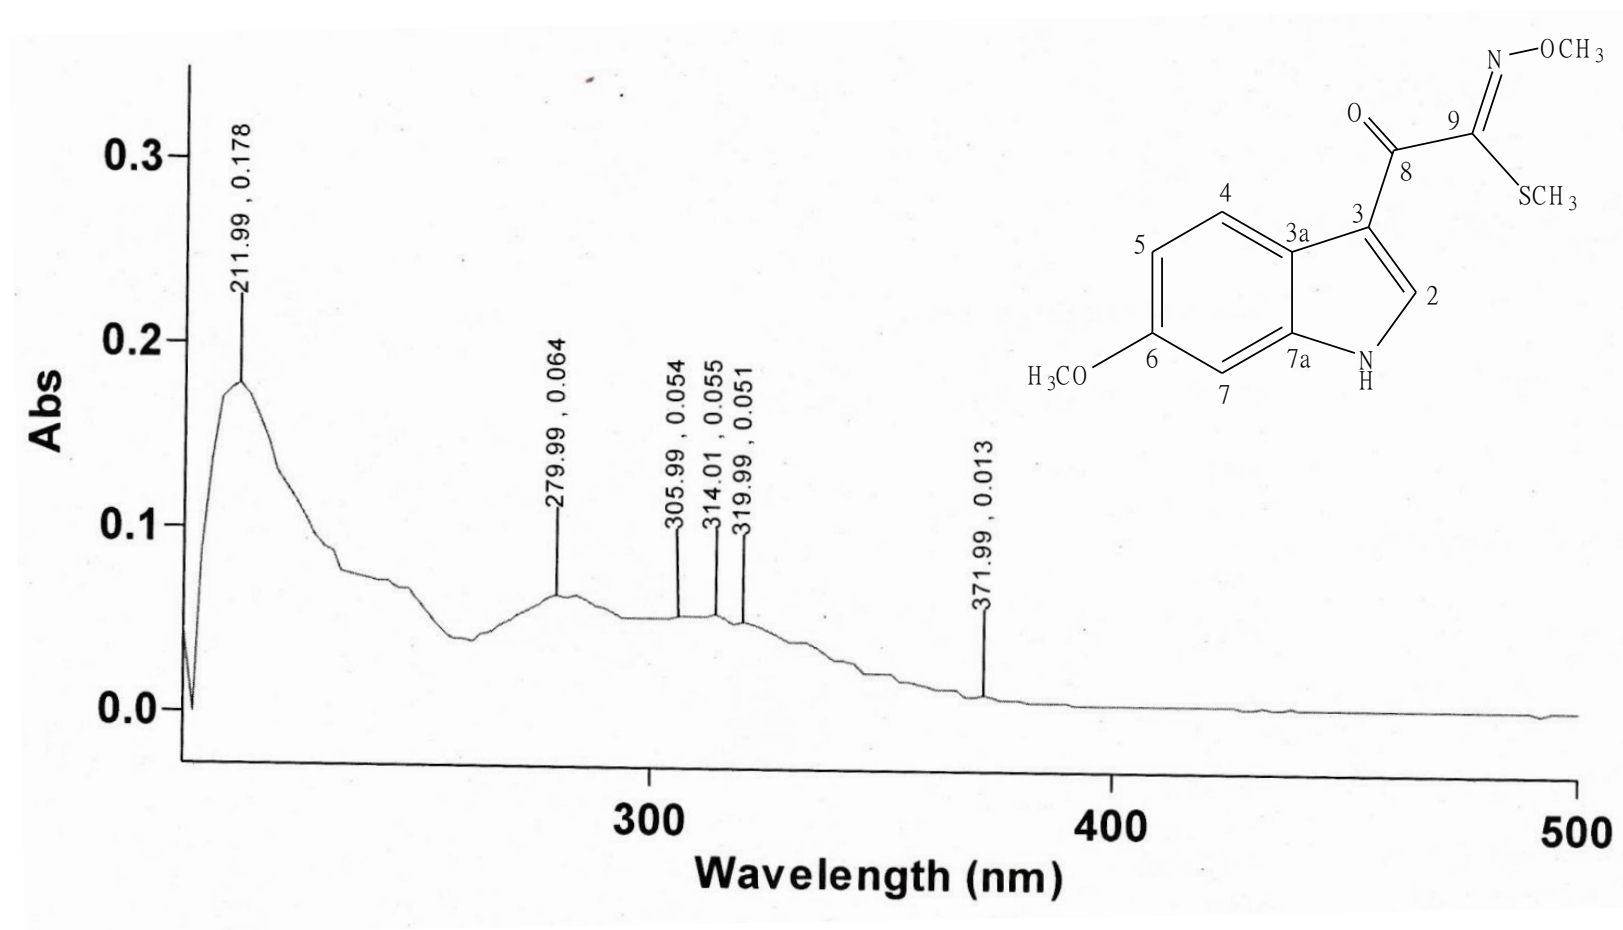

**Figure S37.** The UV spectrum of compound **4**

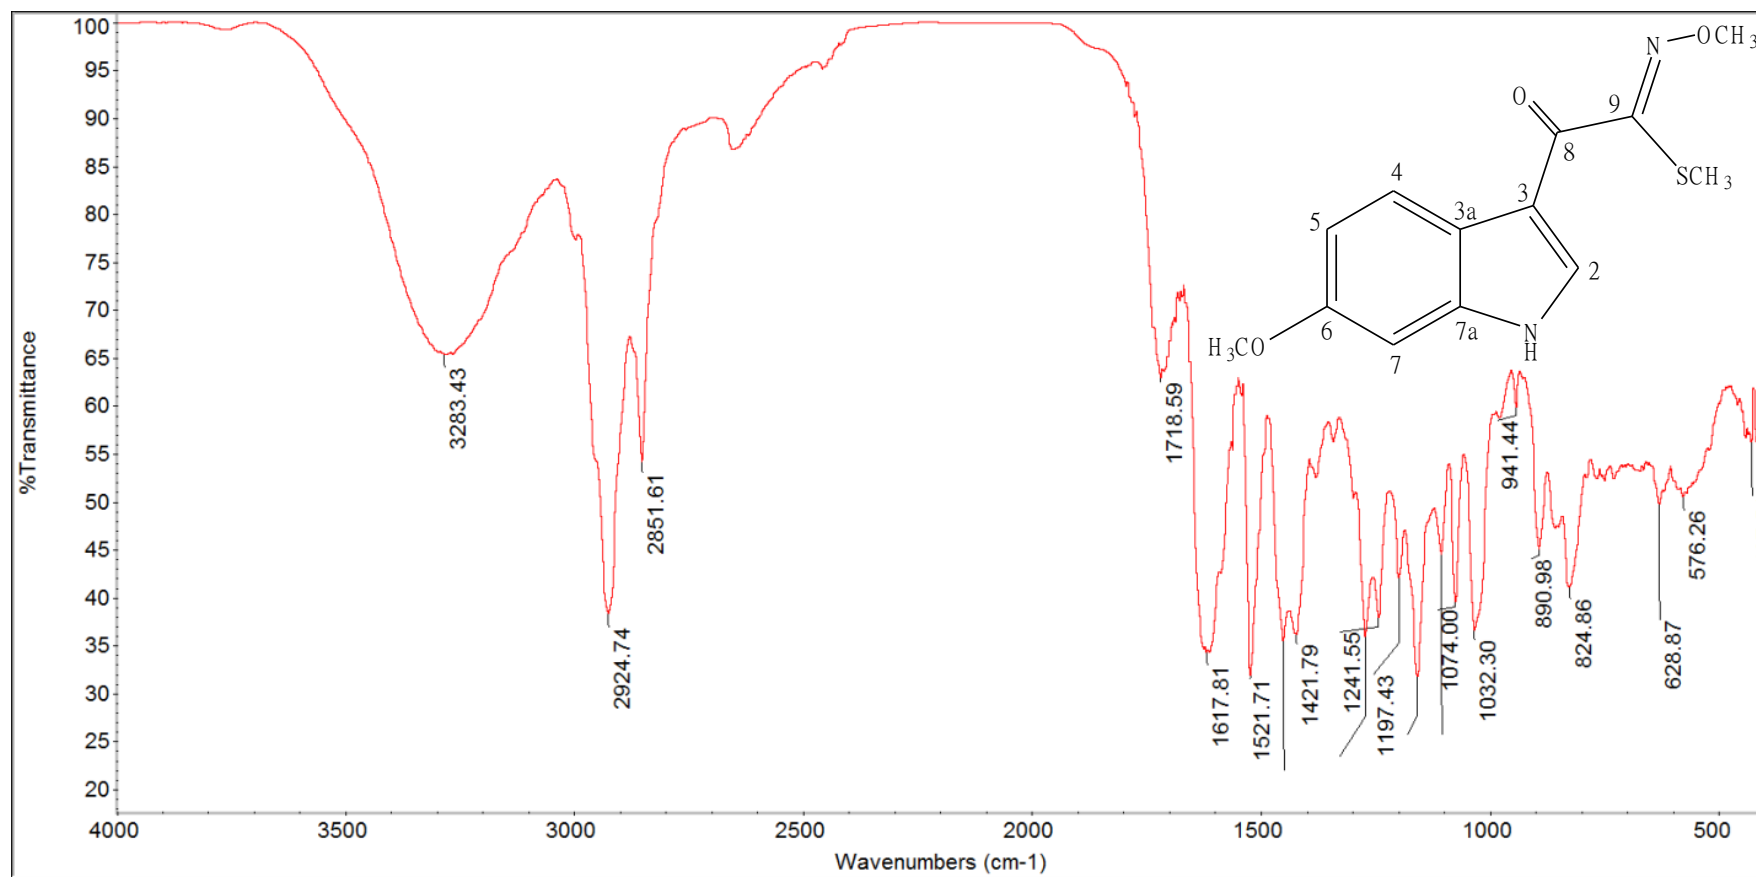

**Figure S38.** The IR spectrum of compound **4** (ATR)

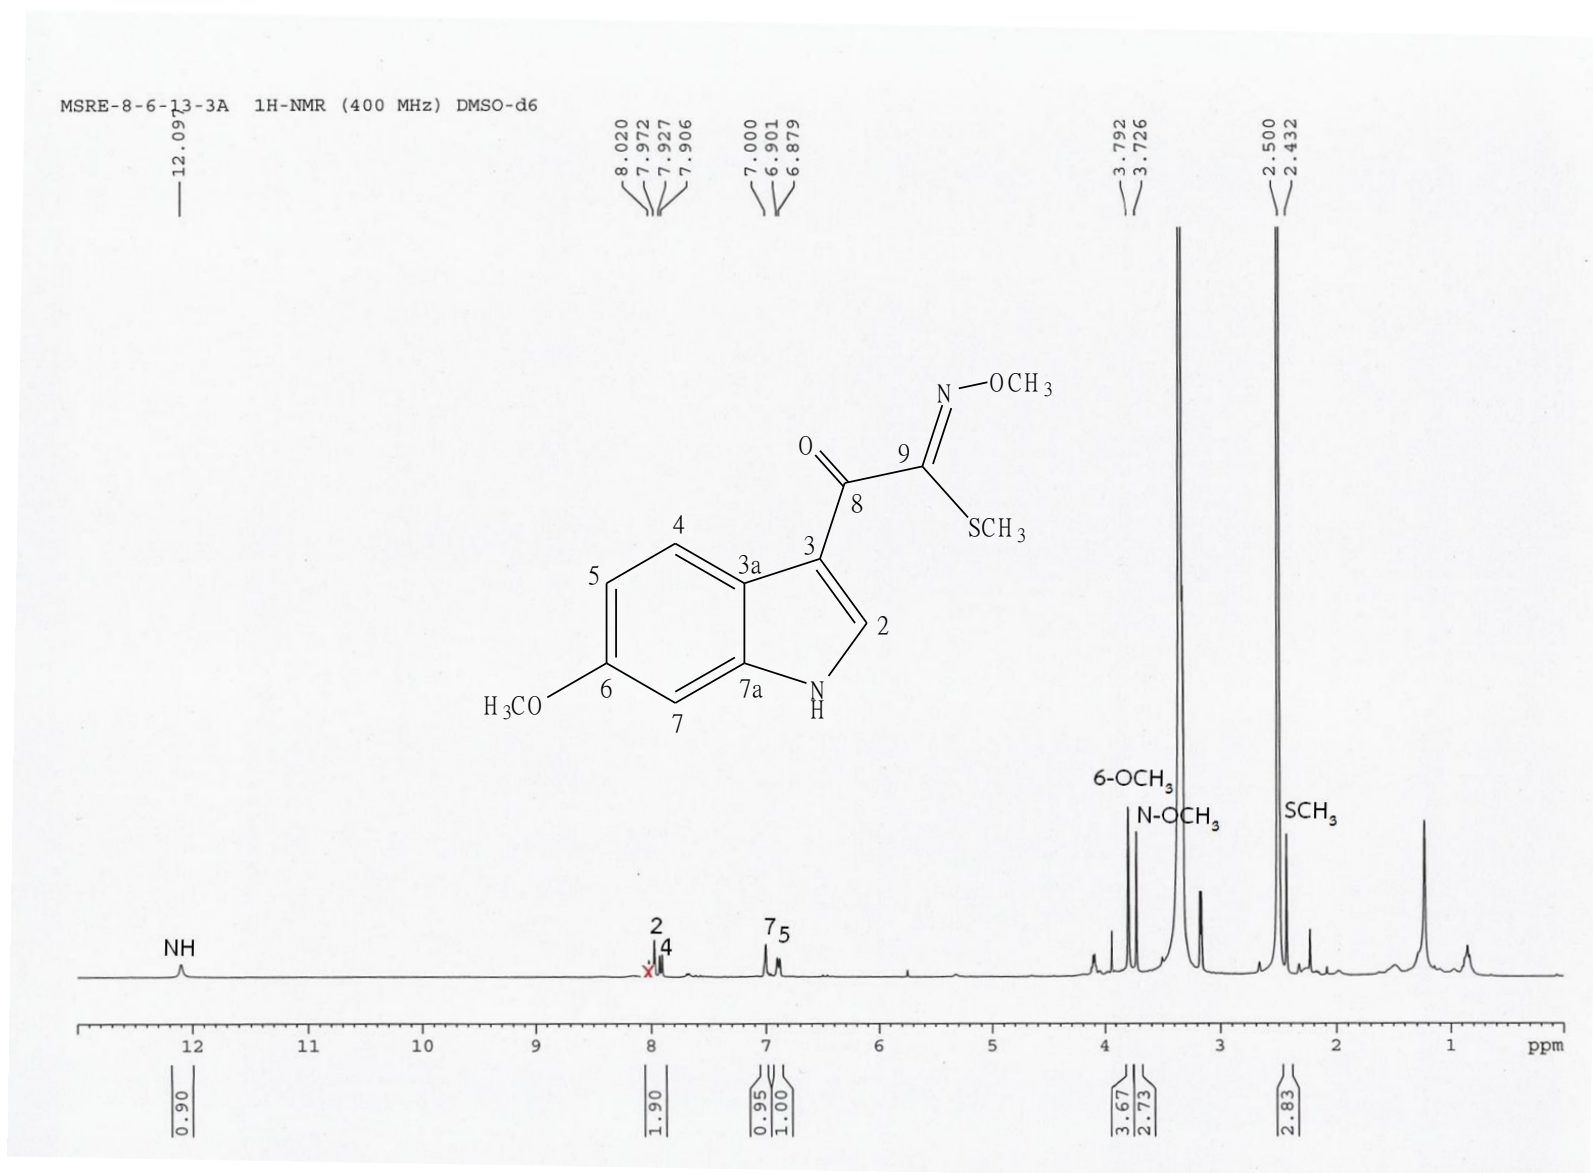

**Figure S39.** The <sup>1</sup>H NMR (400 MHz, DMSO-*d*<sub>6</sub>) spectrum of compound **4**

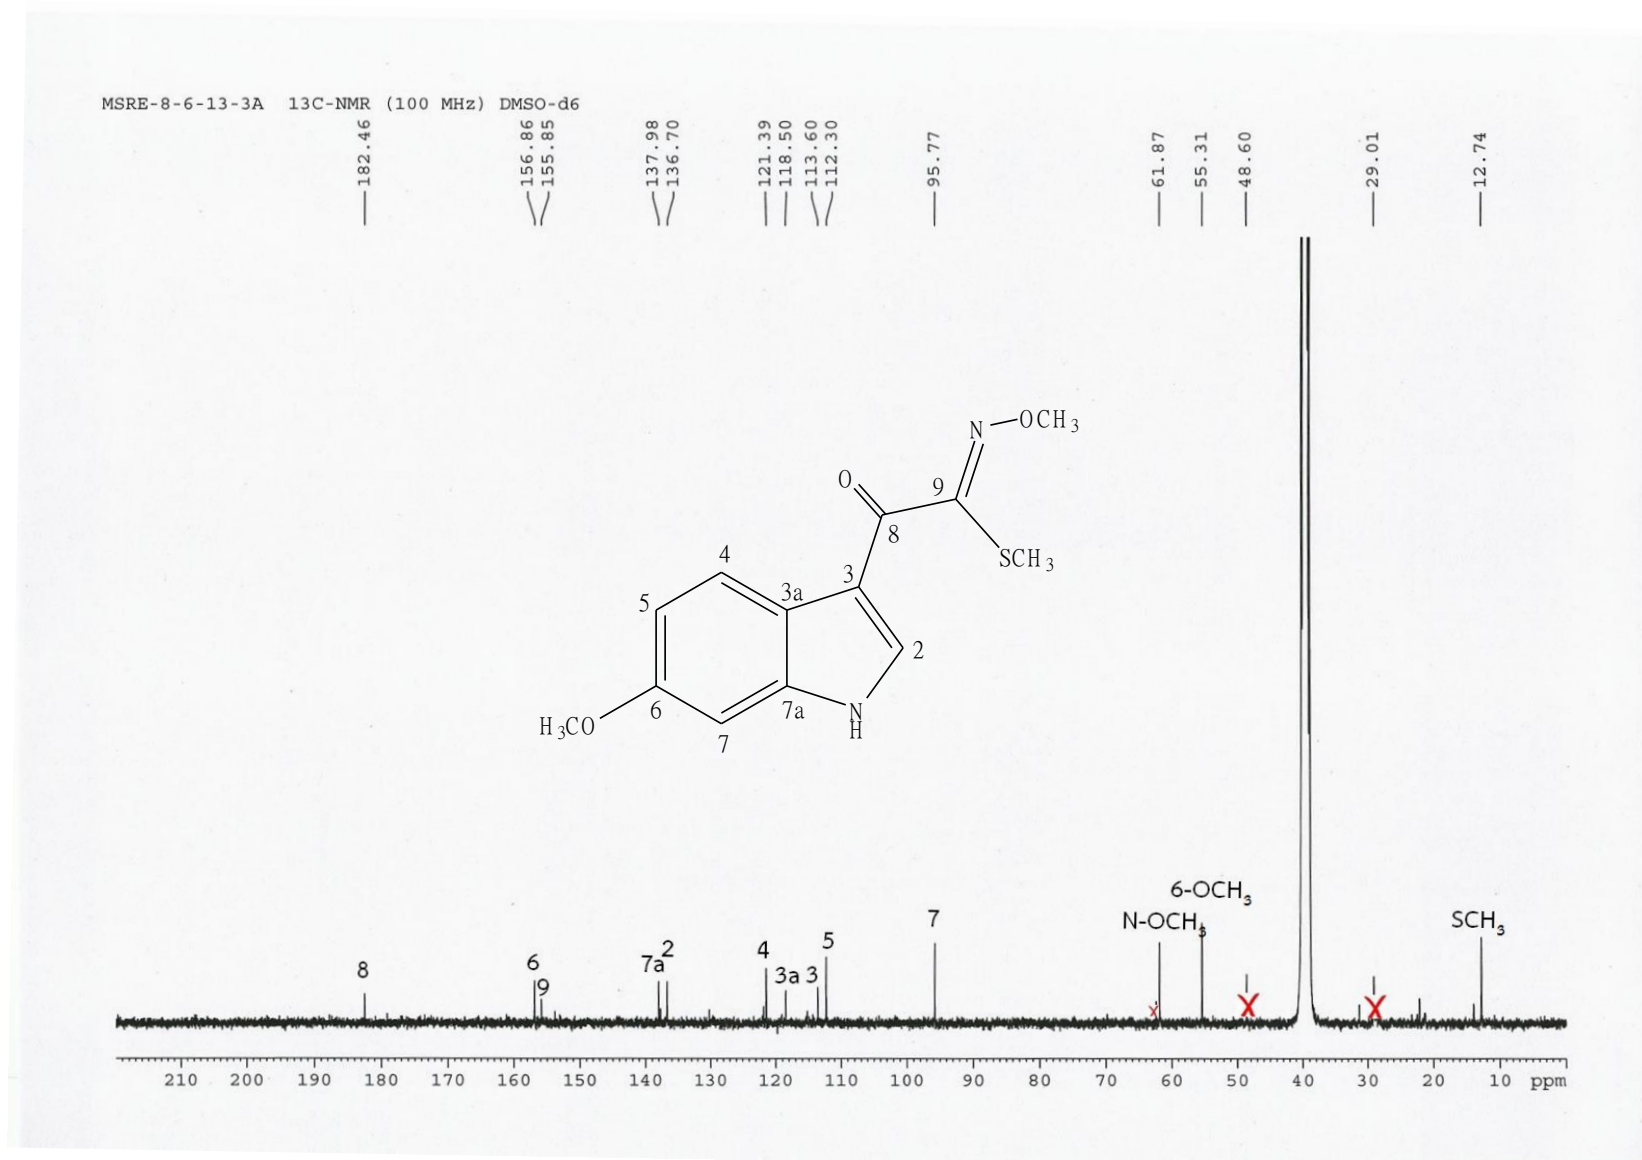

**Figure S40.** The  $^{13}\text{C}$  NMR (100 MHz, DMSO- $d_6$ ) spectrum of compound 4

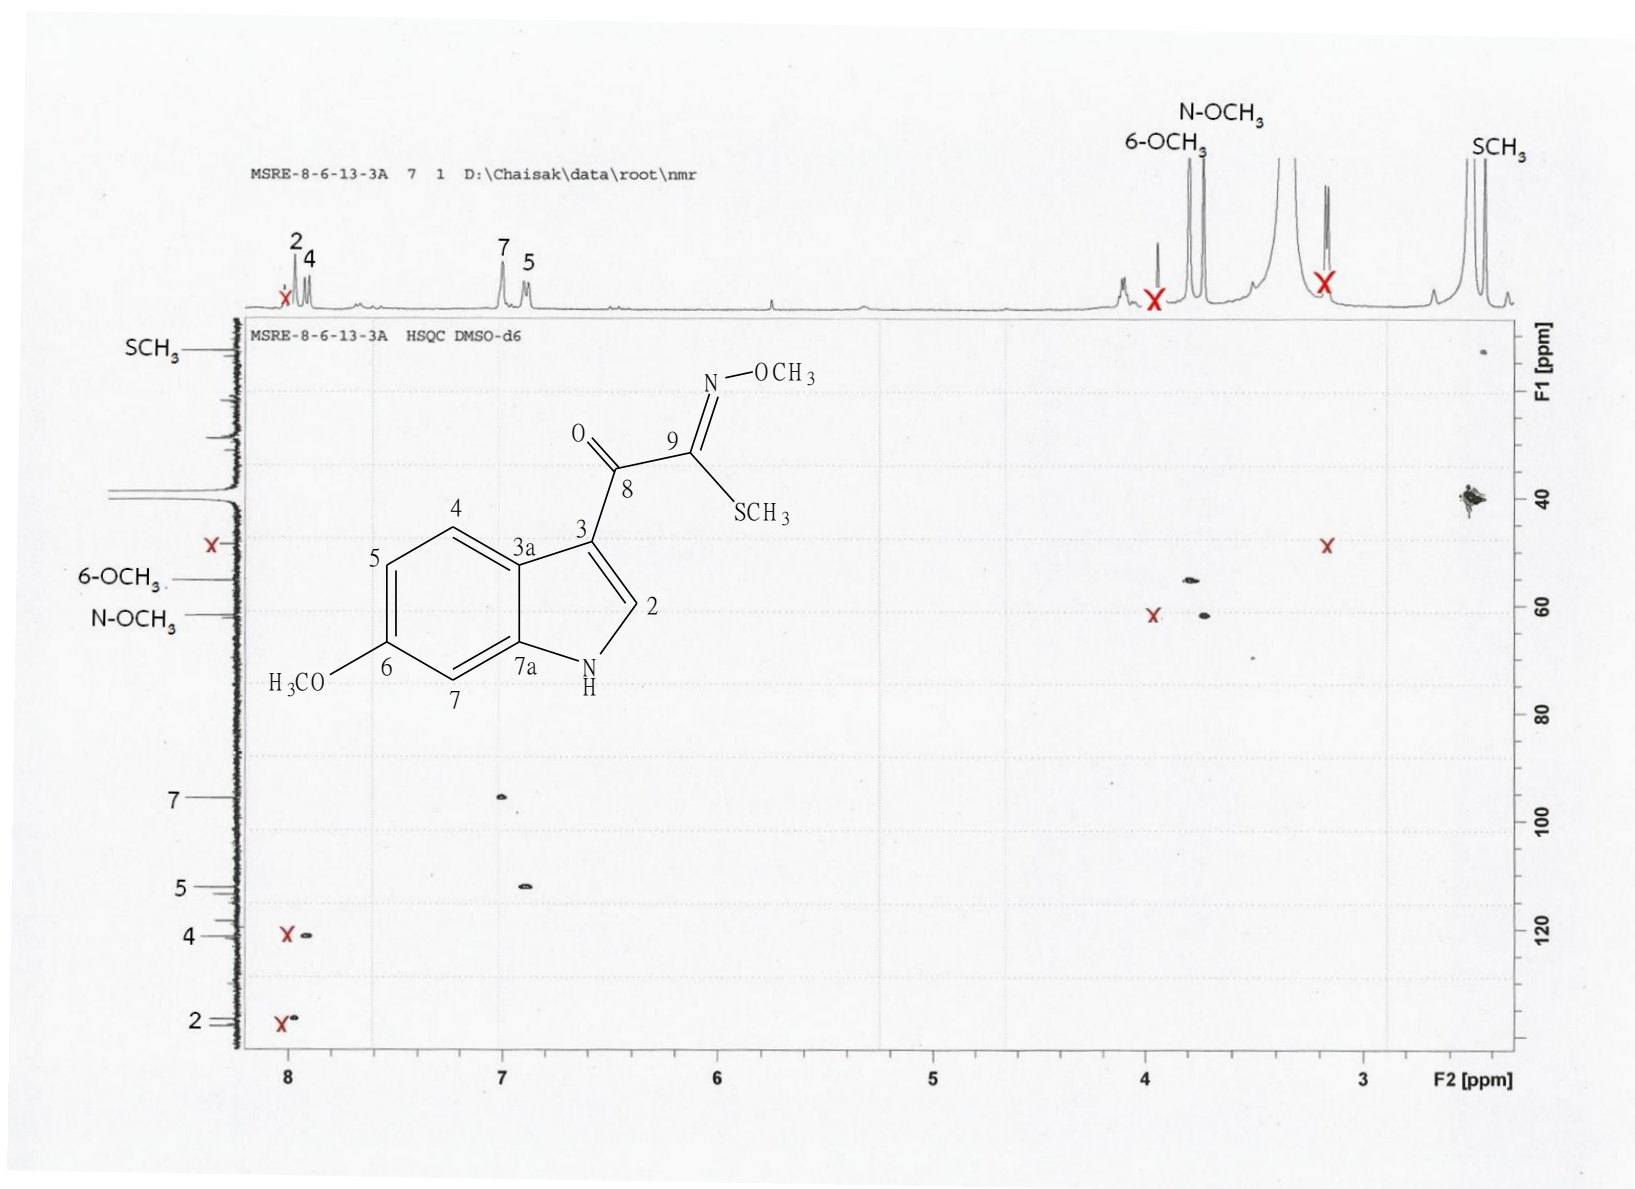

**Figure S41.** The HSQC spectrum of compound **4**

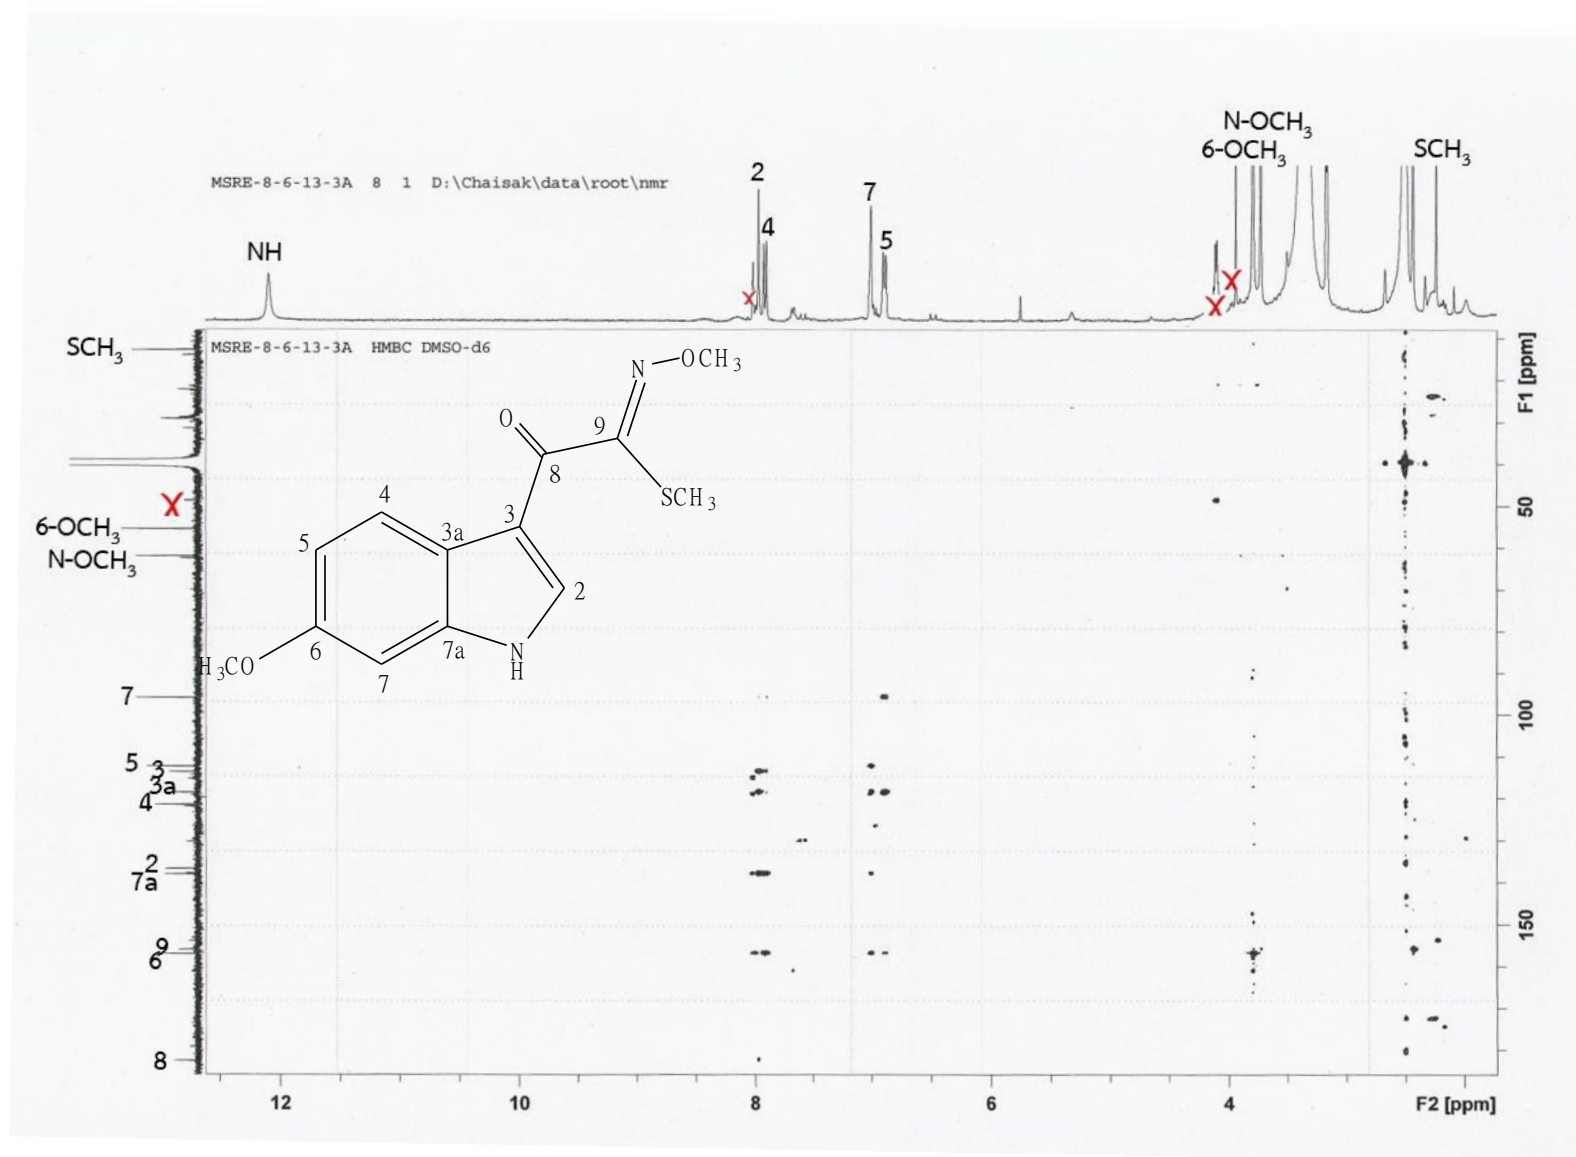

**Figure S42.** The HMBC spectrum of compound **4**

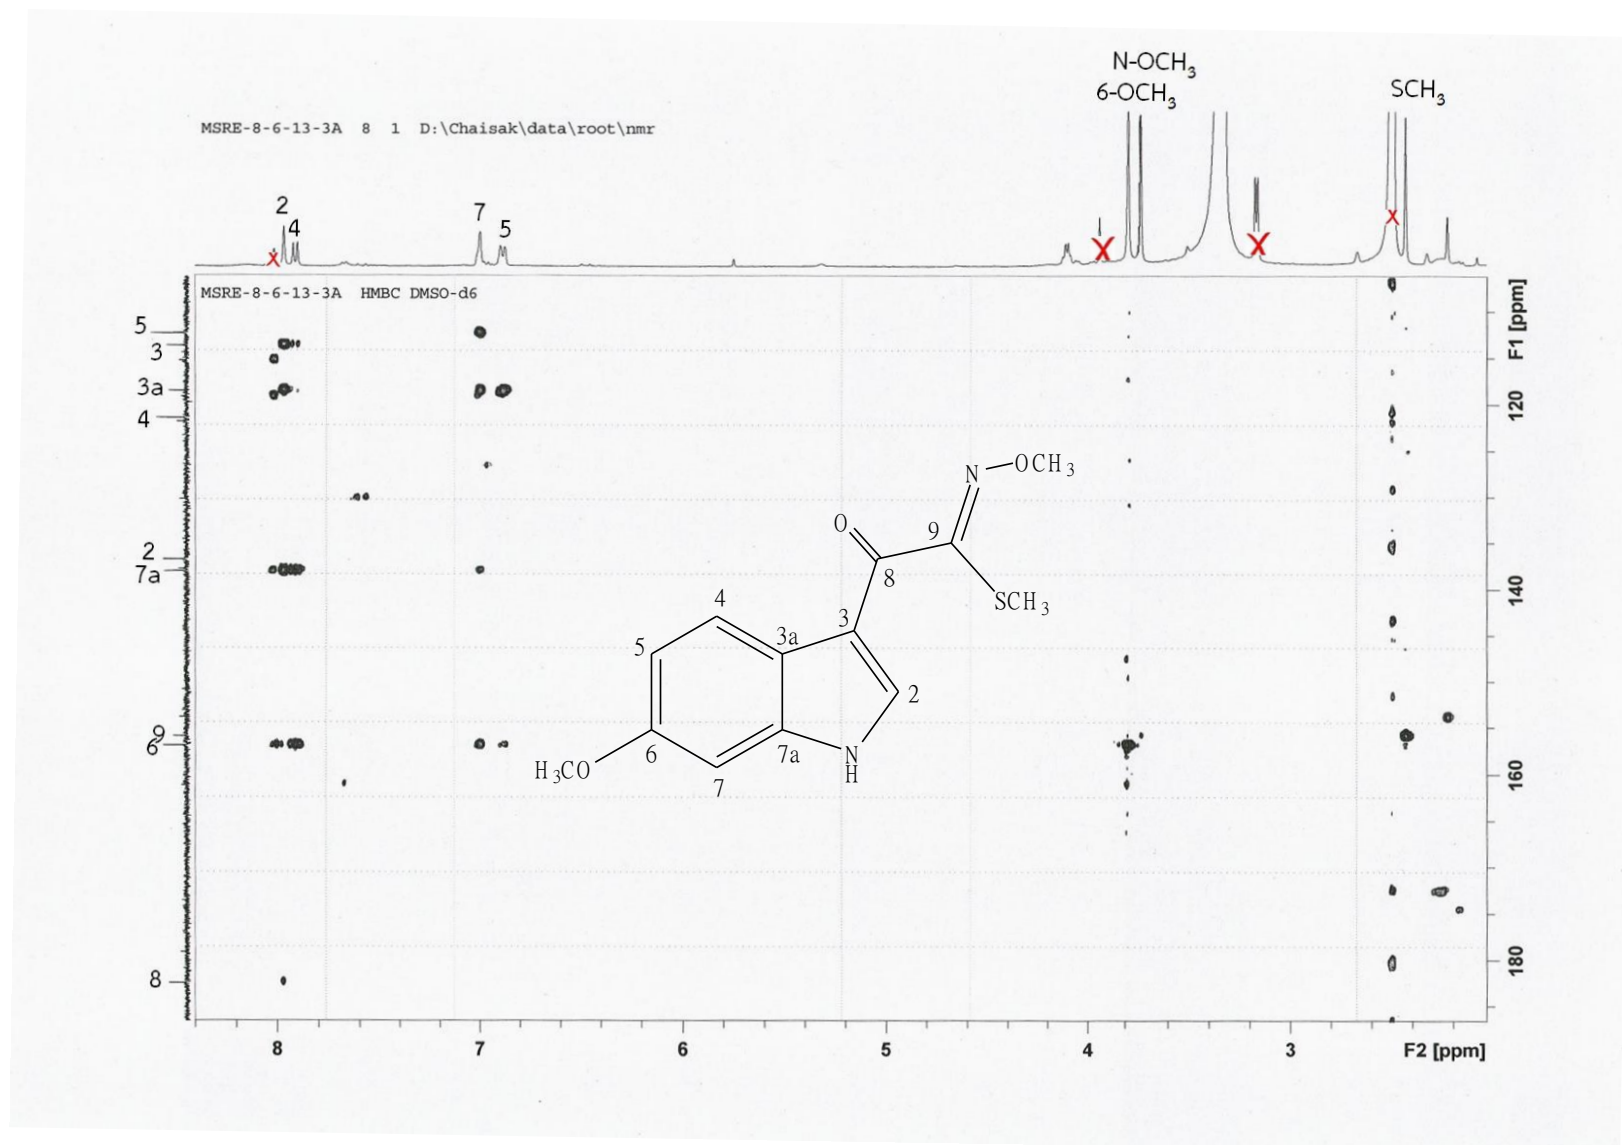

**Figure S43.** The HMBC spectrum of compound **4** (continued)



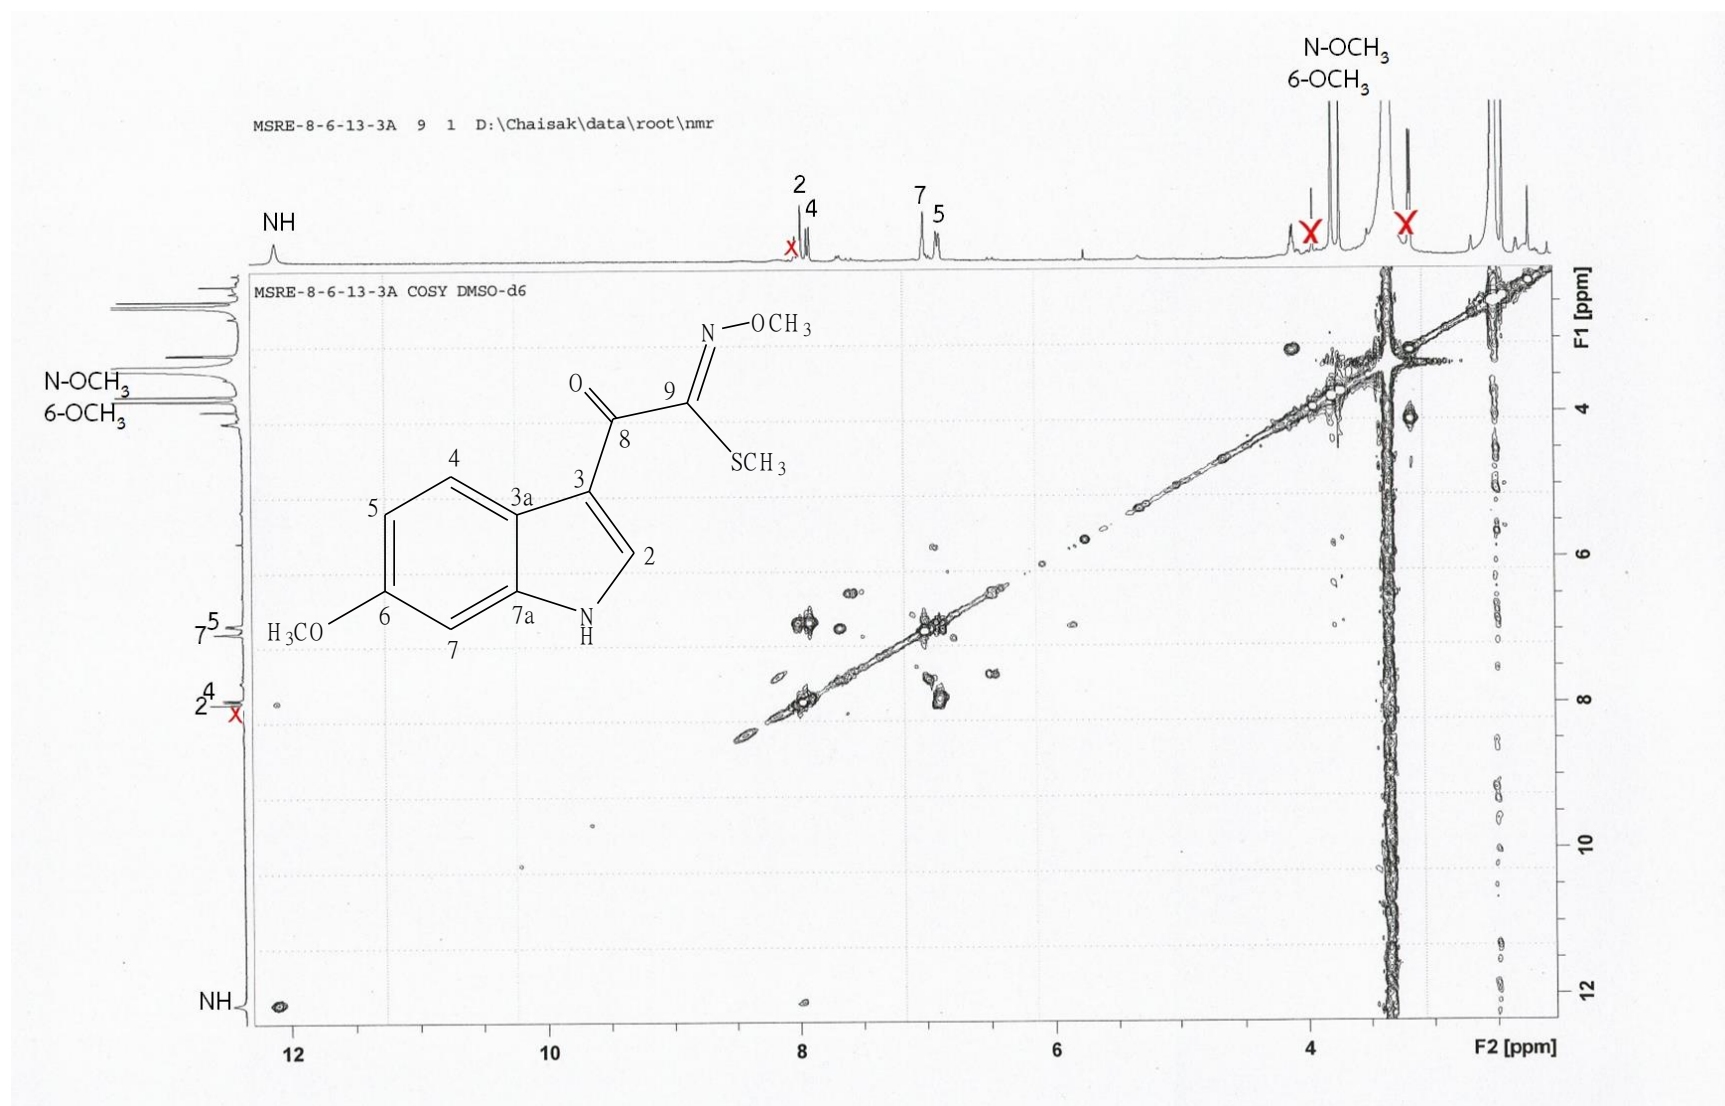

**Figure S44.** The <sup>1</sup>H-<sup>1</sup>H COSY spectrum of compound **4**



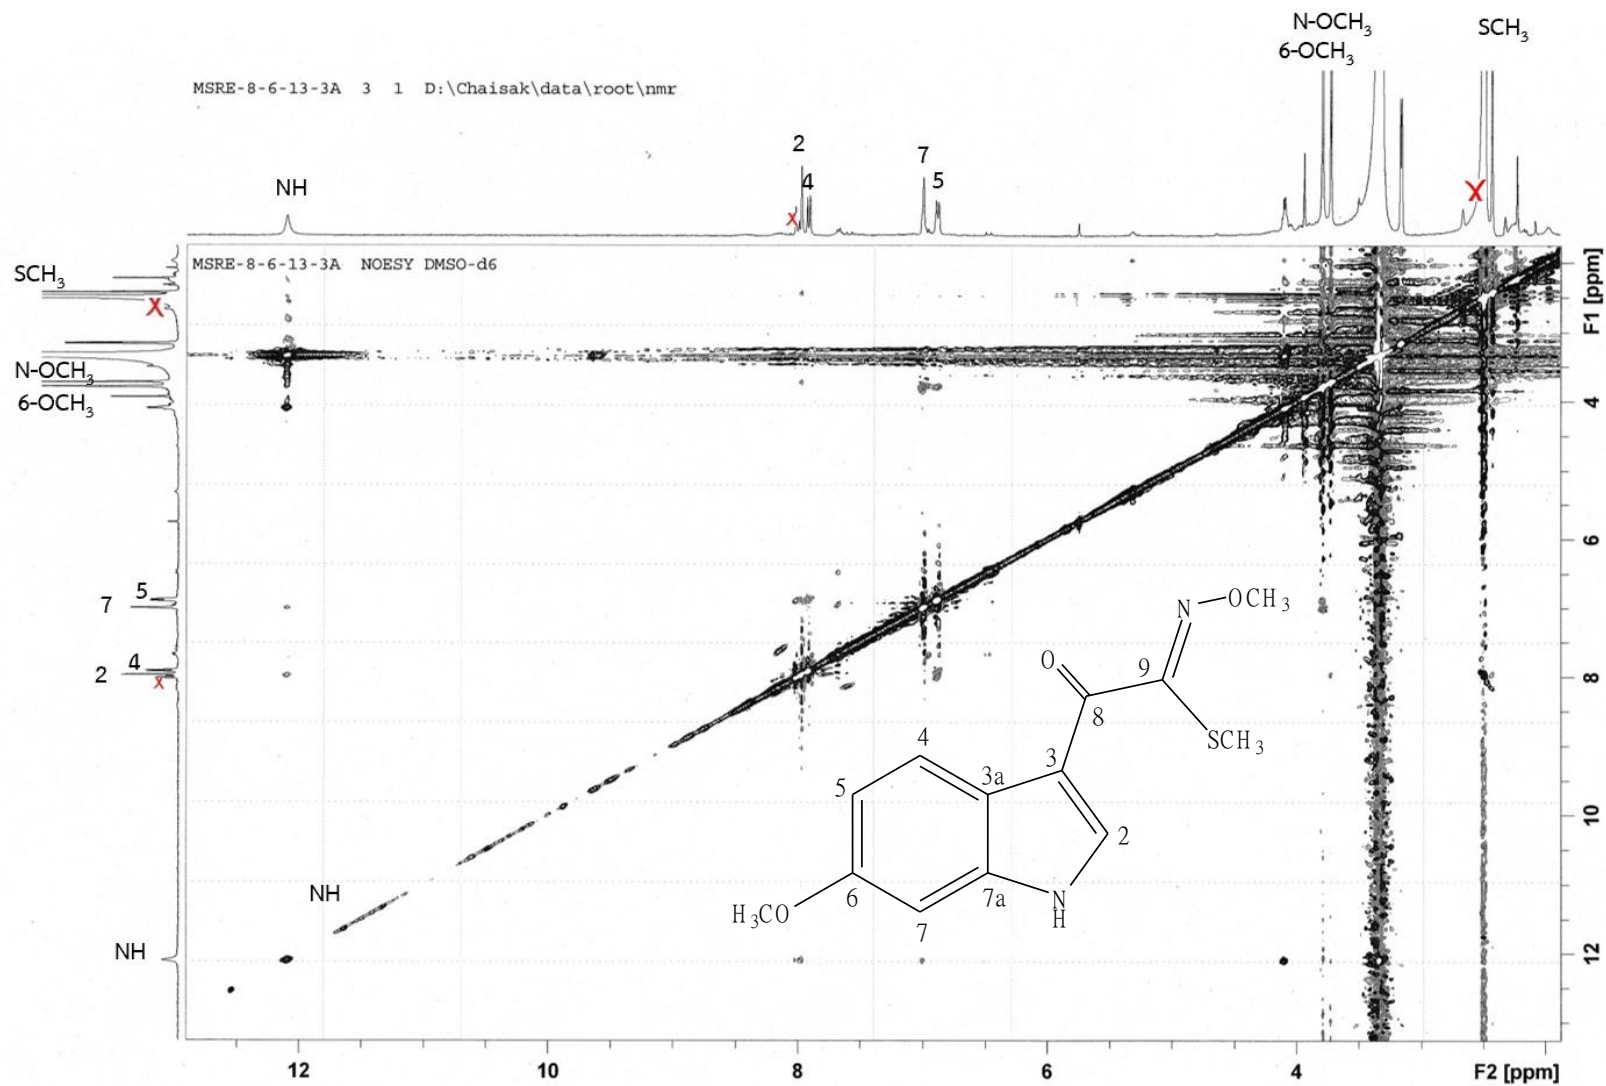

**Figure S45.** The NOESY spectrum of compound 4

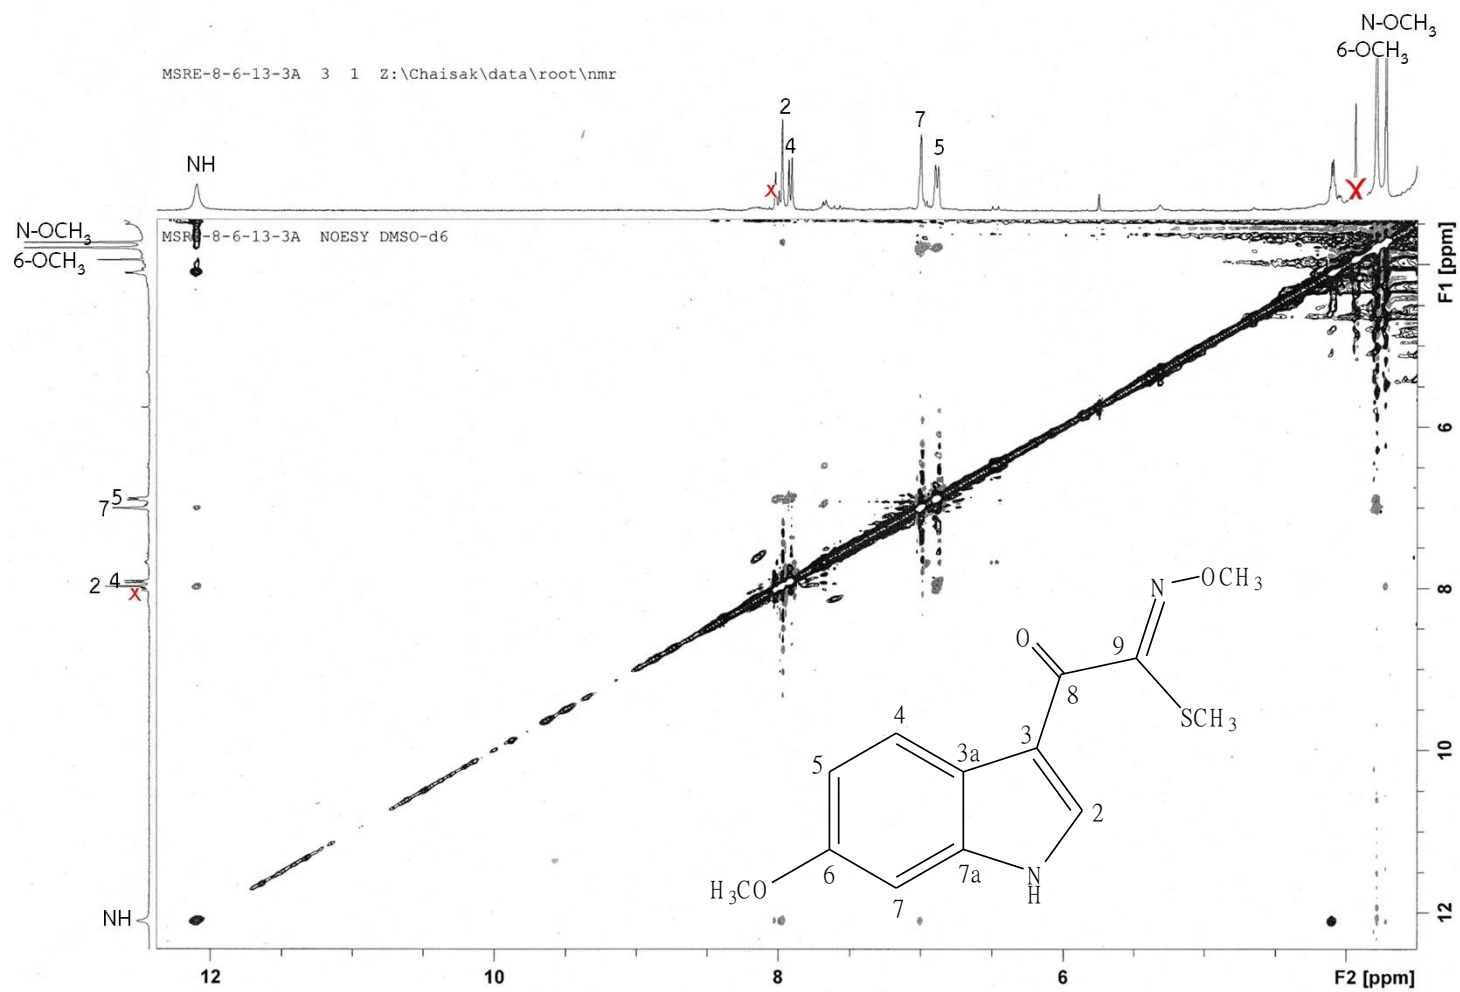

**Figure S46.** The NOESY spectrum of compound **4** (continued)

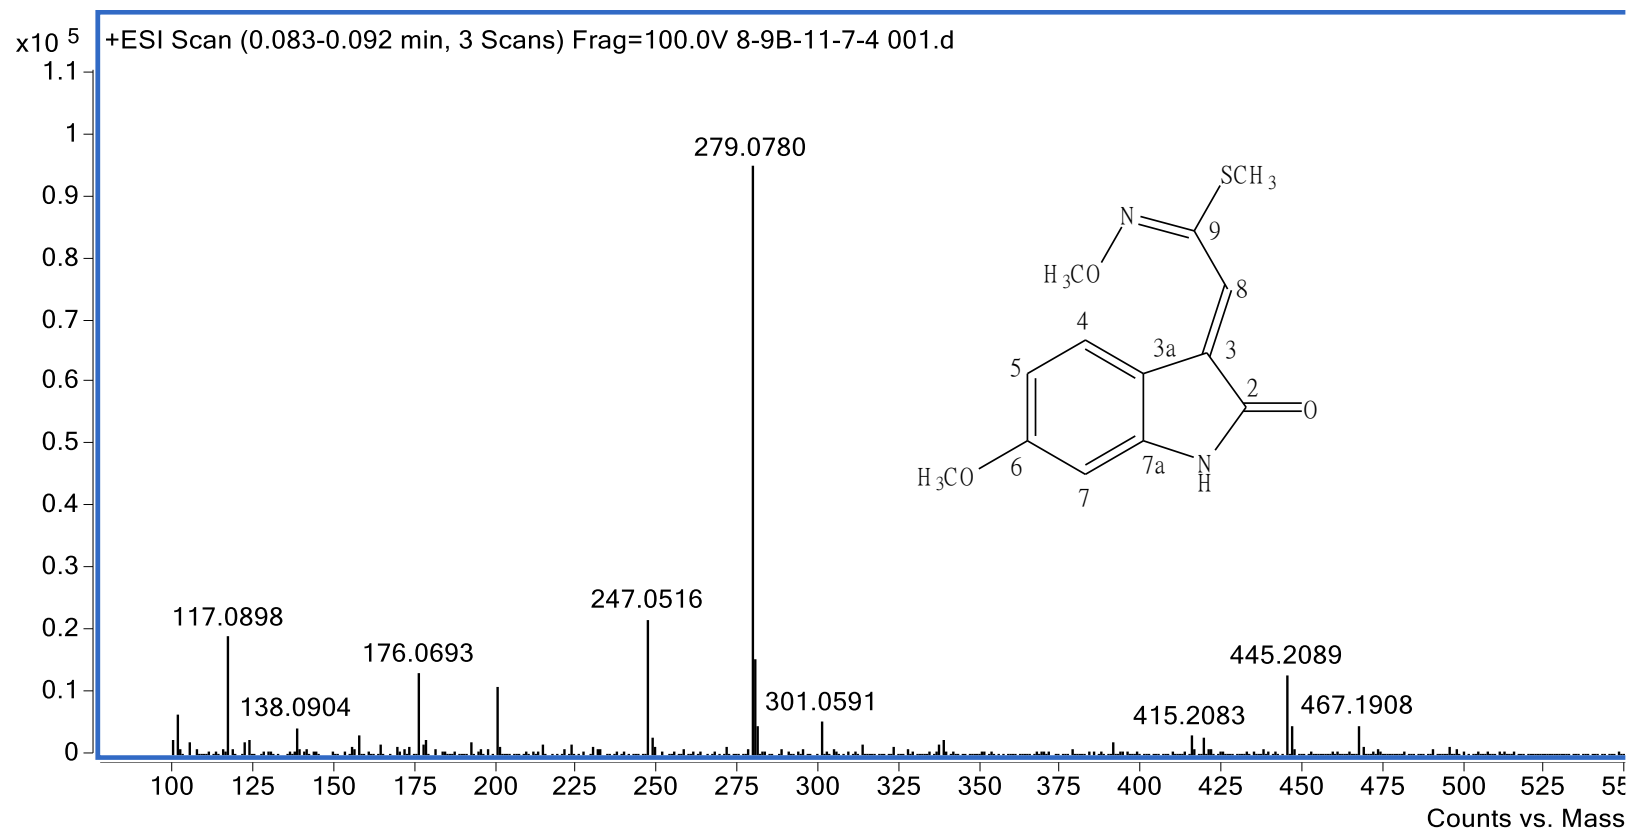

**Figure S47.** The HR-ESI-MS spectrum of compound **5**

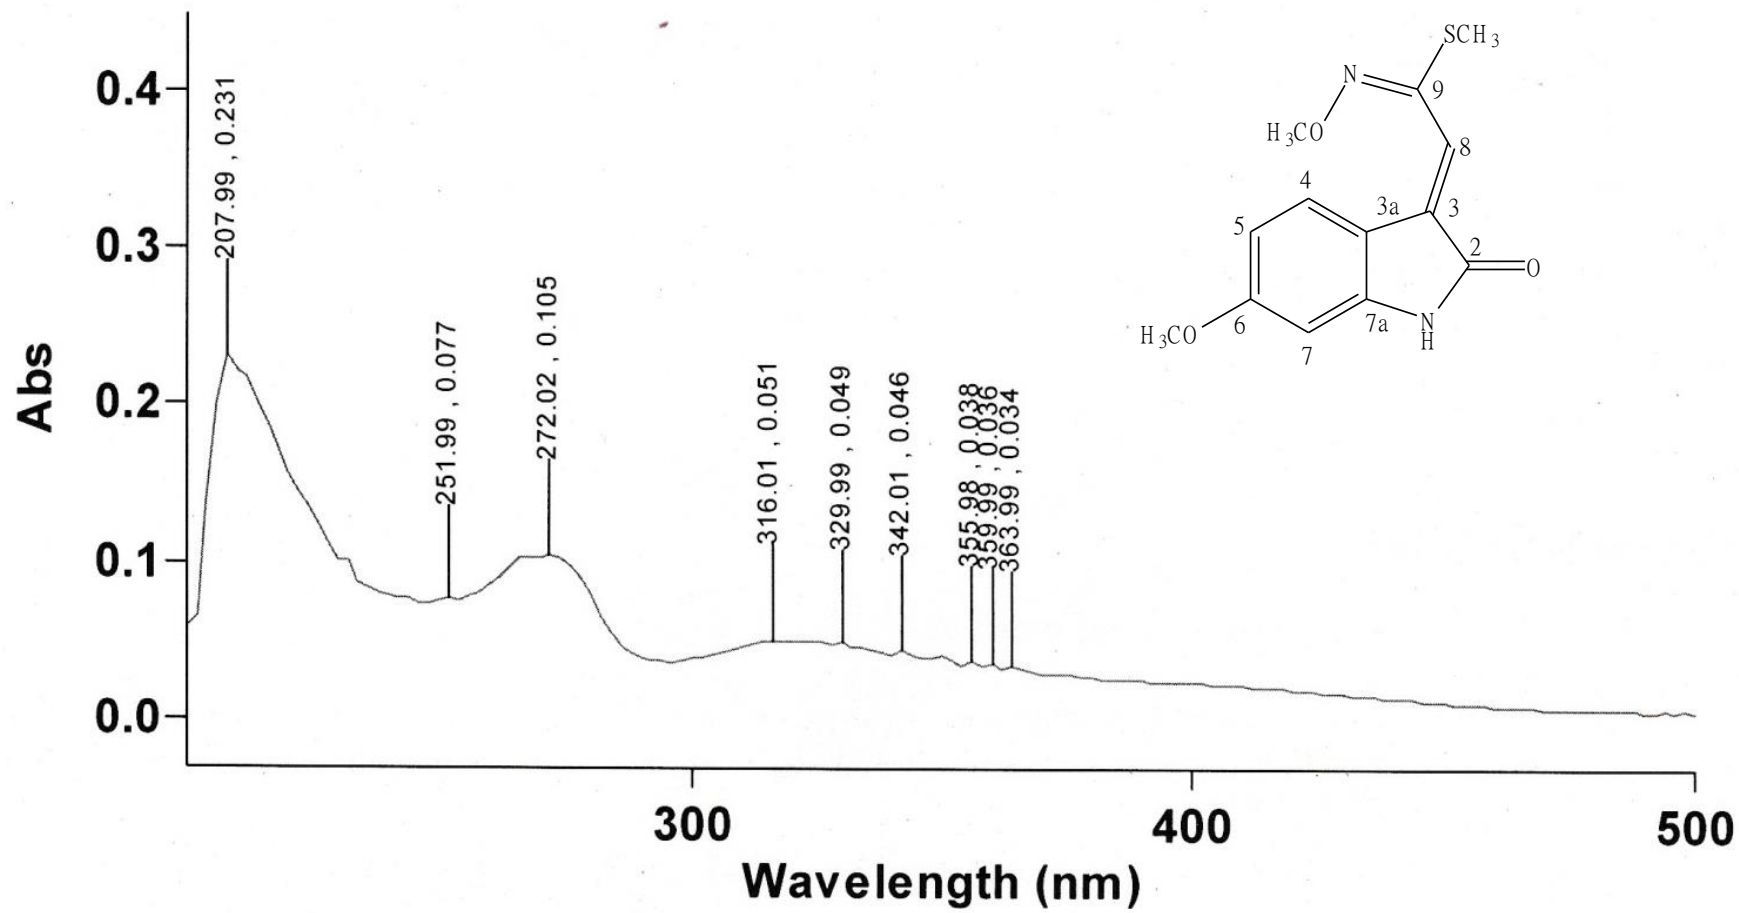

**Figure S48.** The UV spectrum of compound **5**

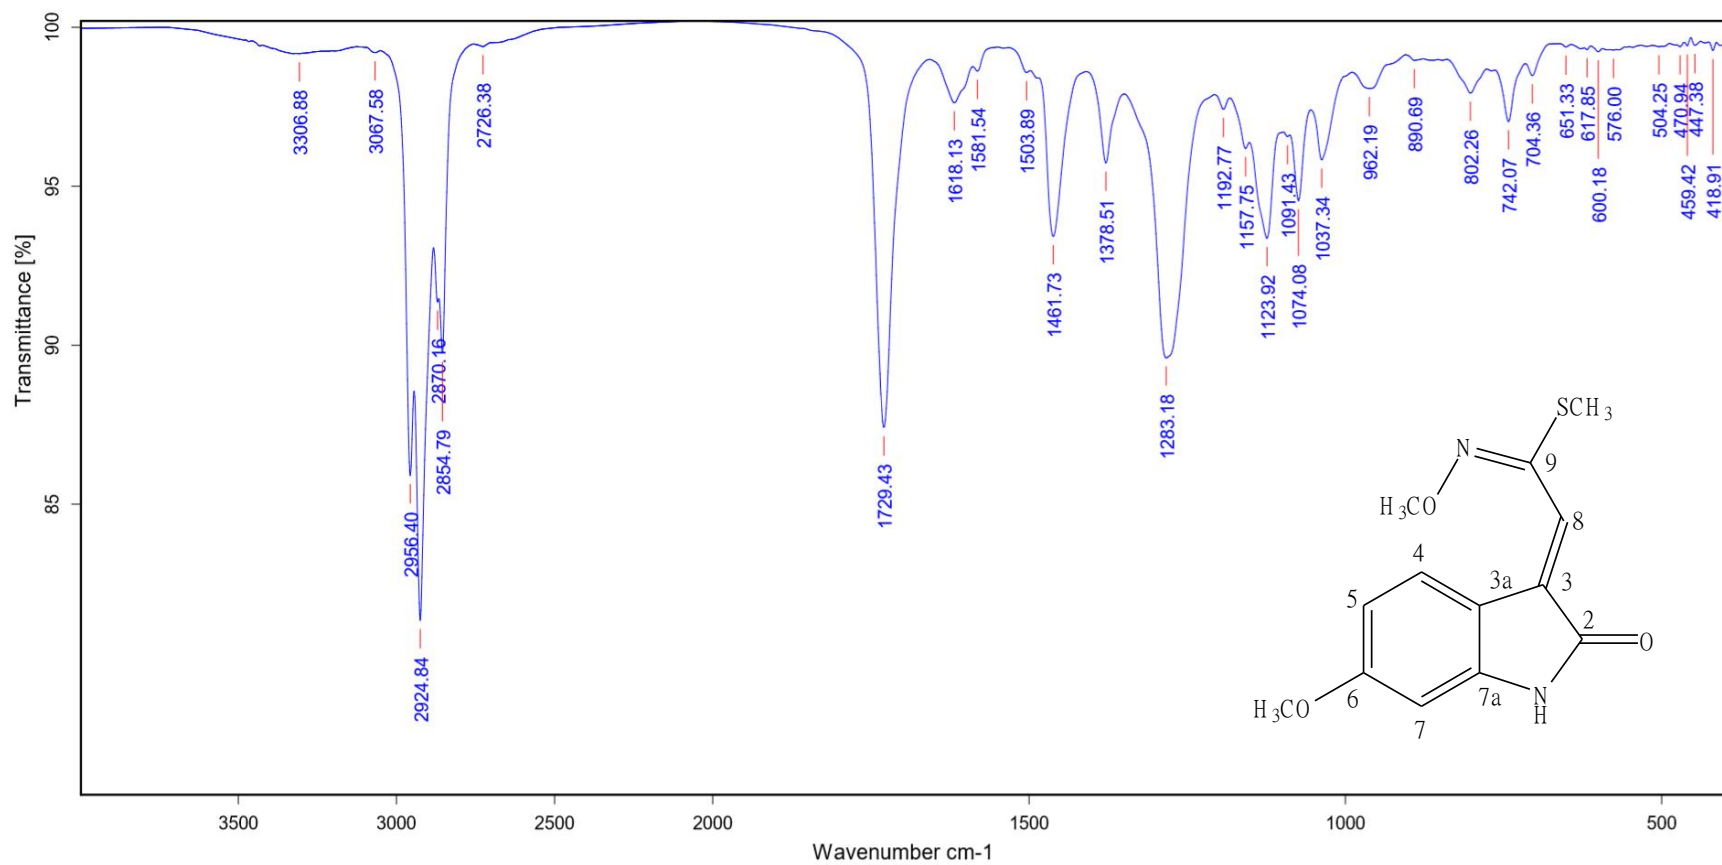

**Figure S49.** The IR spectrum of compound **5** (ATR)

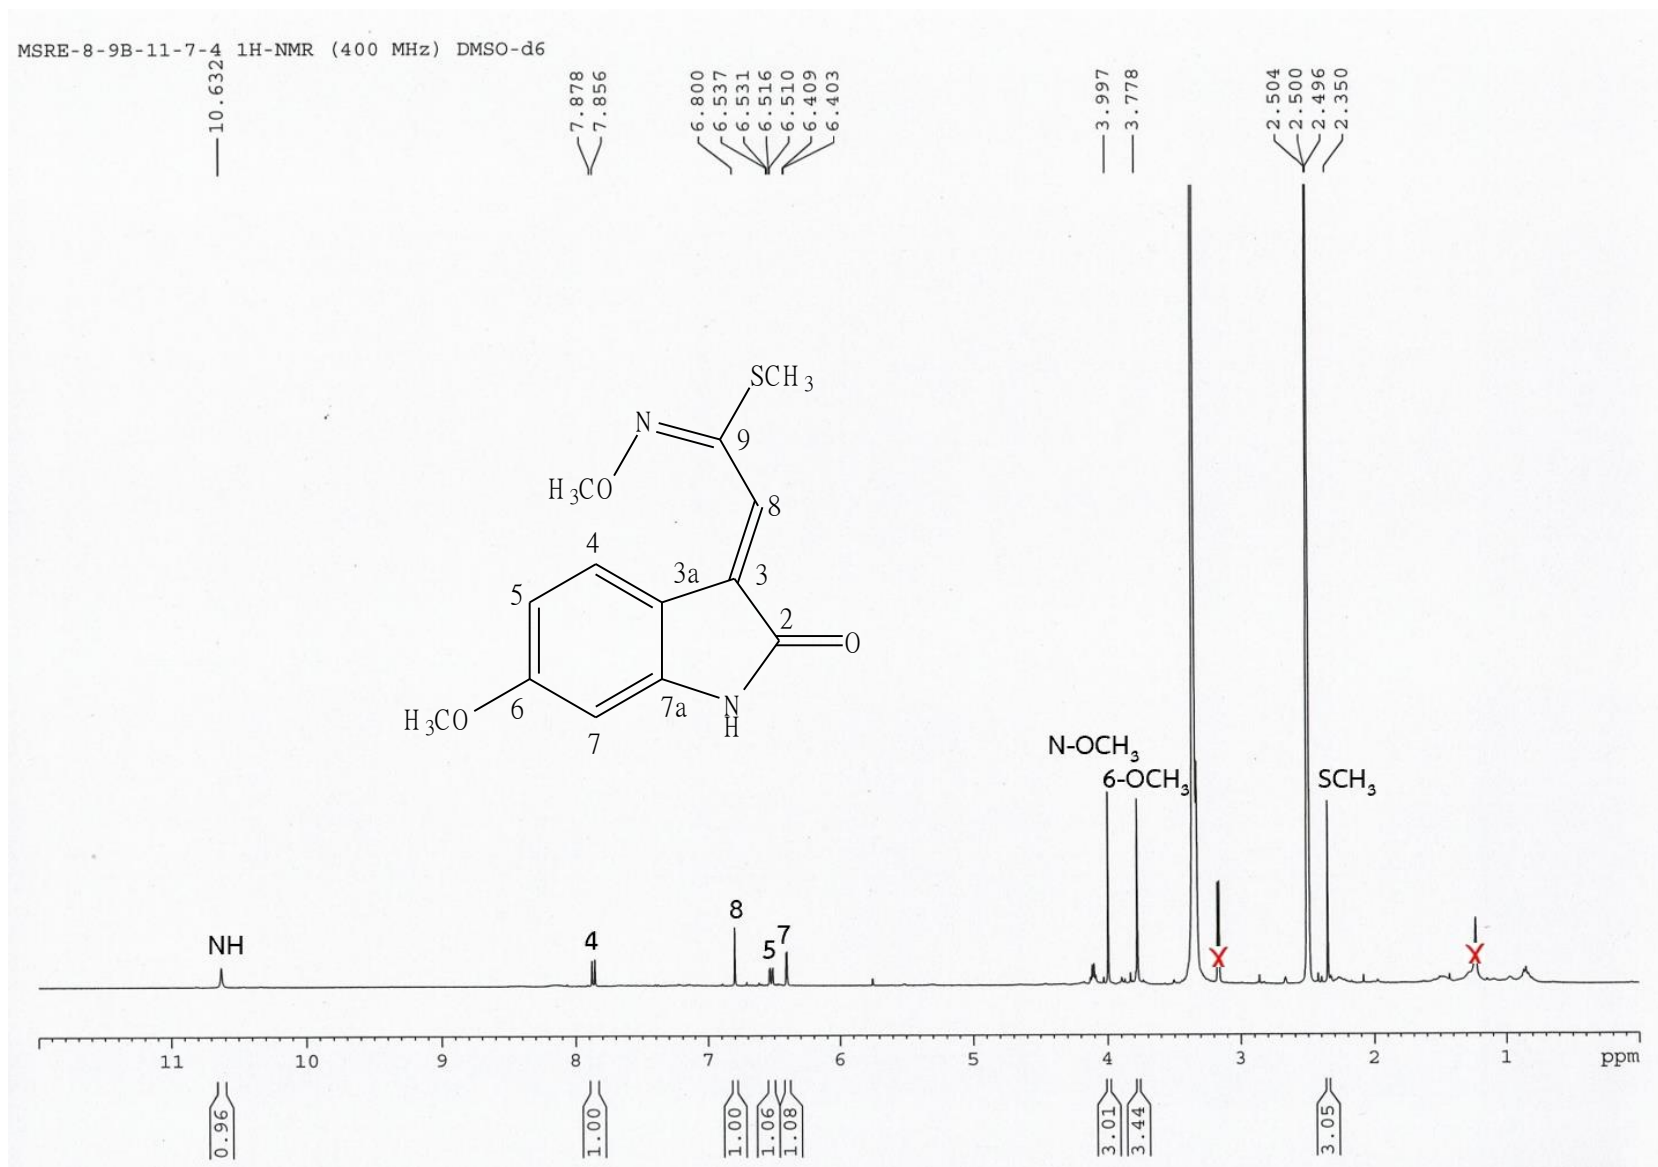

**Figure S50.** The <sup>1</sup>H NMR (400 MHz, DMSO-*d*<sub>6</sub>) spectrum of compound **5**

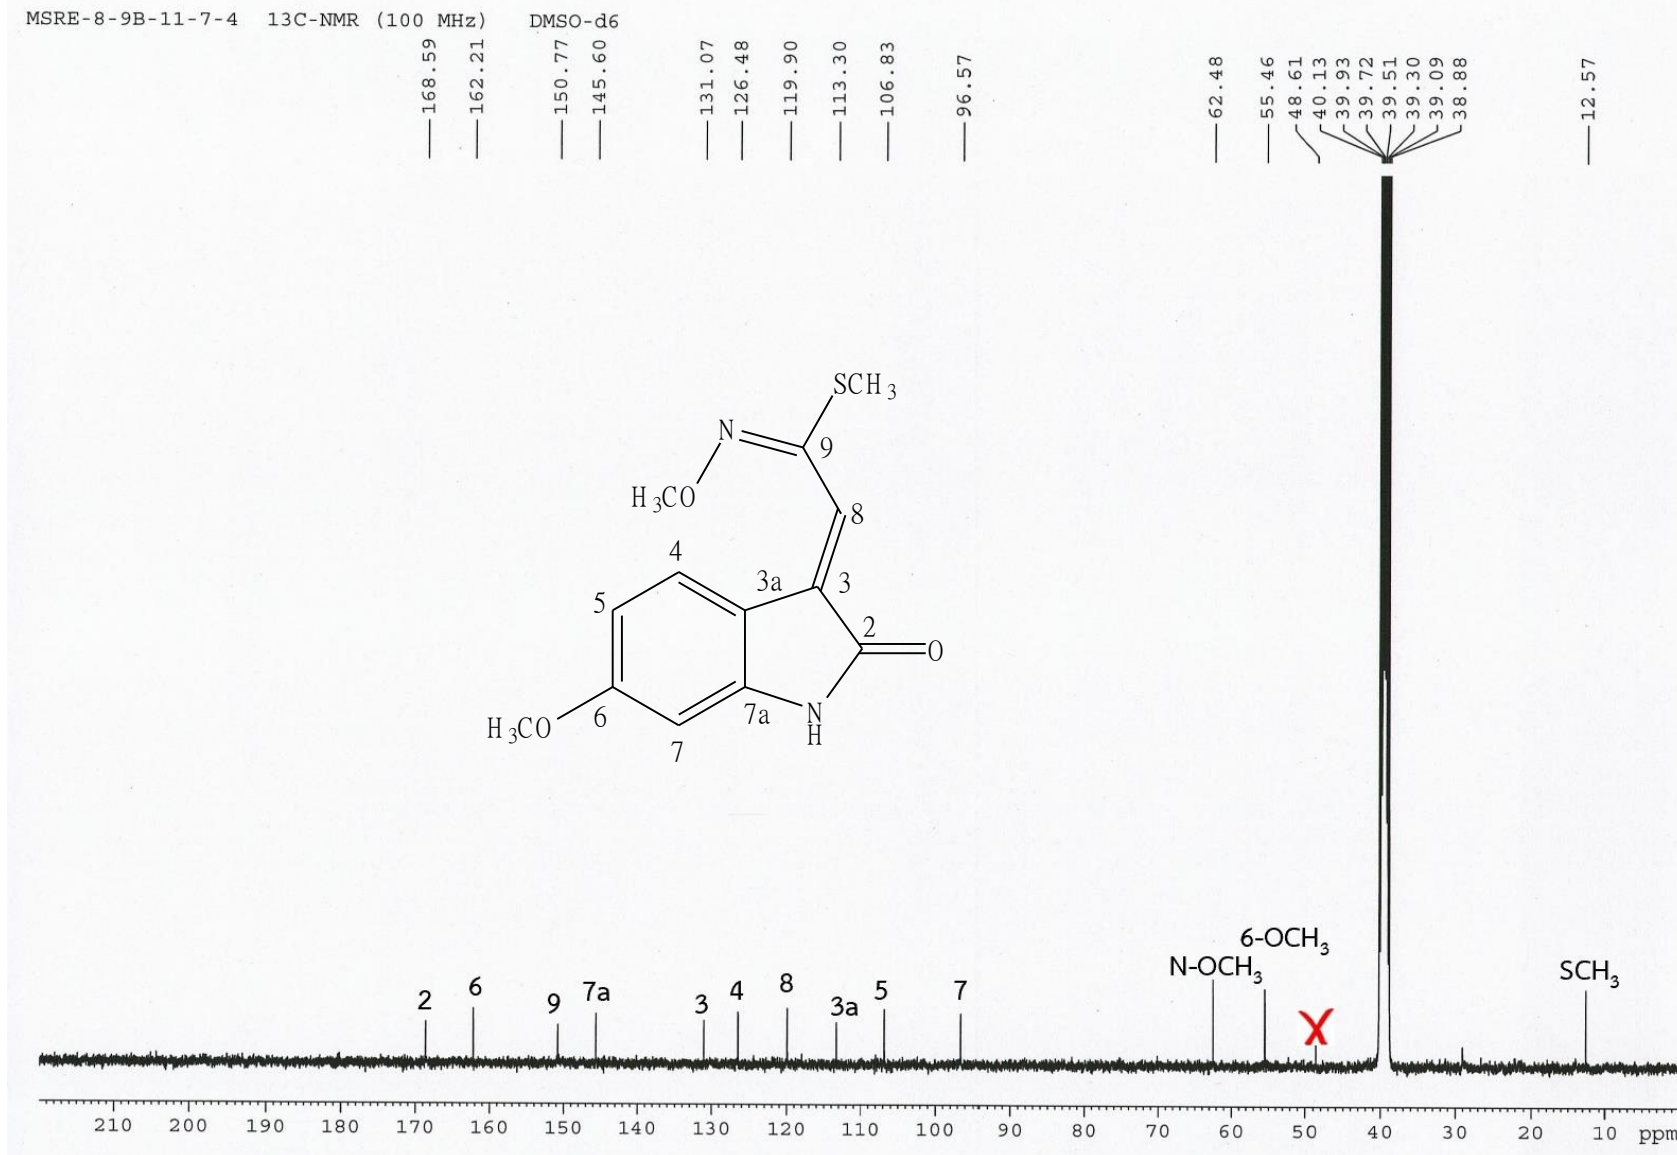

**Figure S51.** The  $^{13}\text{C}$  NMR (100 MHz, DMSO- $d_6$ ) spectrum of compound **5**



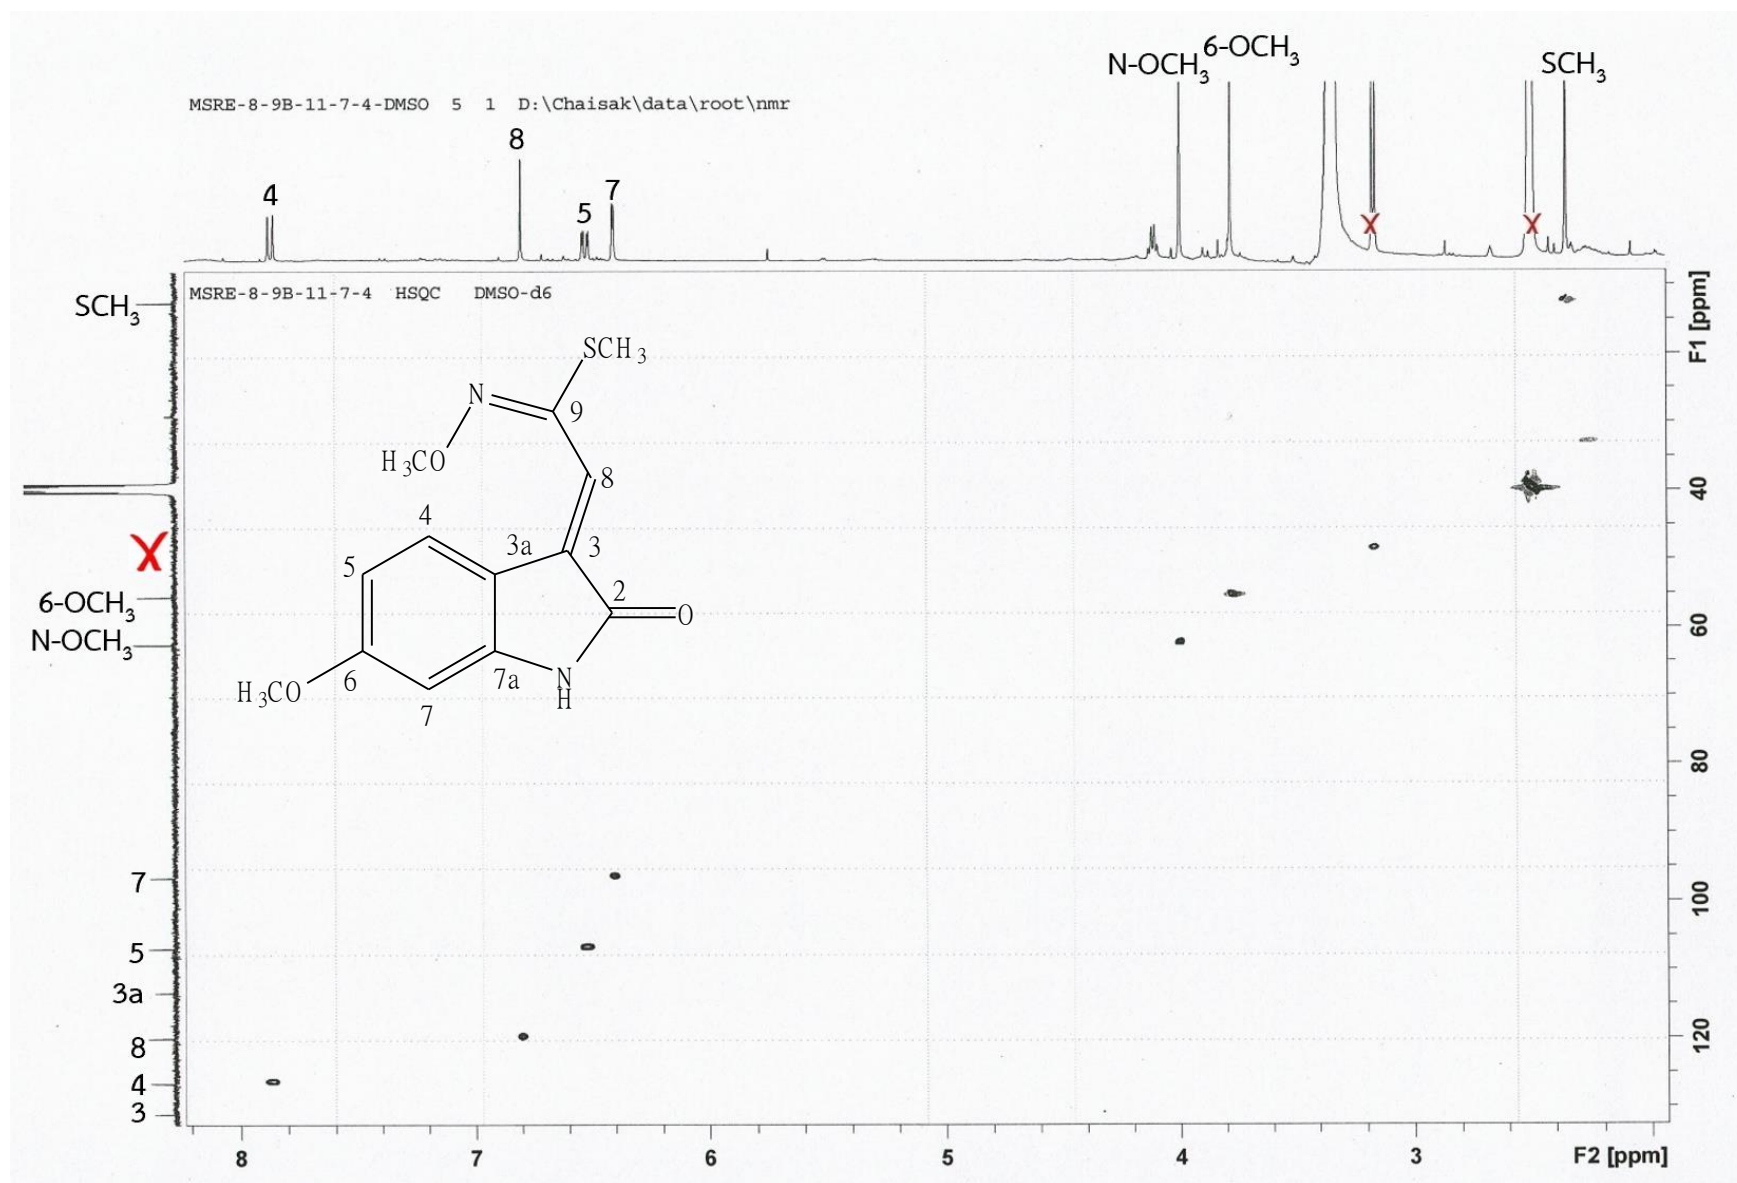

**Figure S52.** The HSQC spectrum of compound **5**



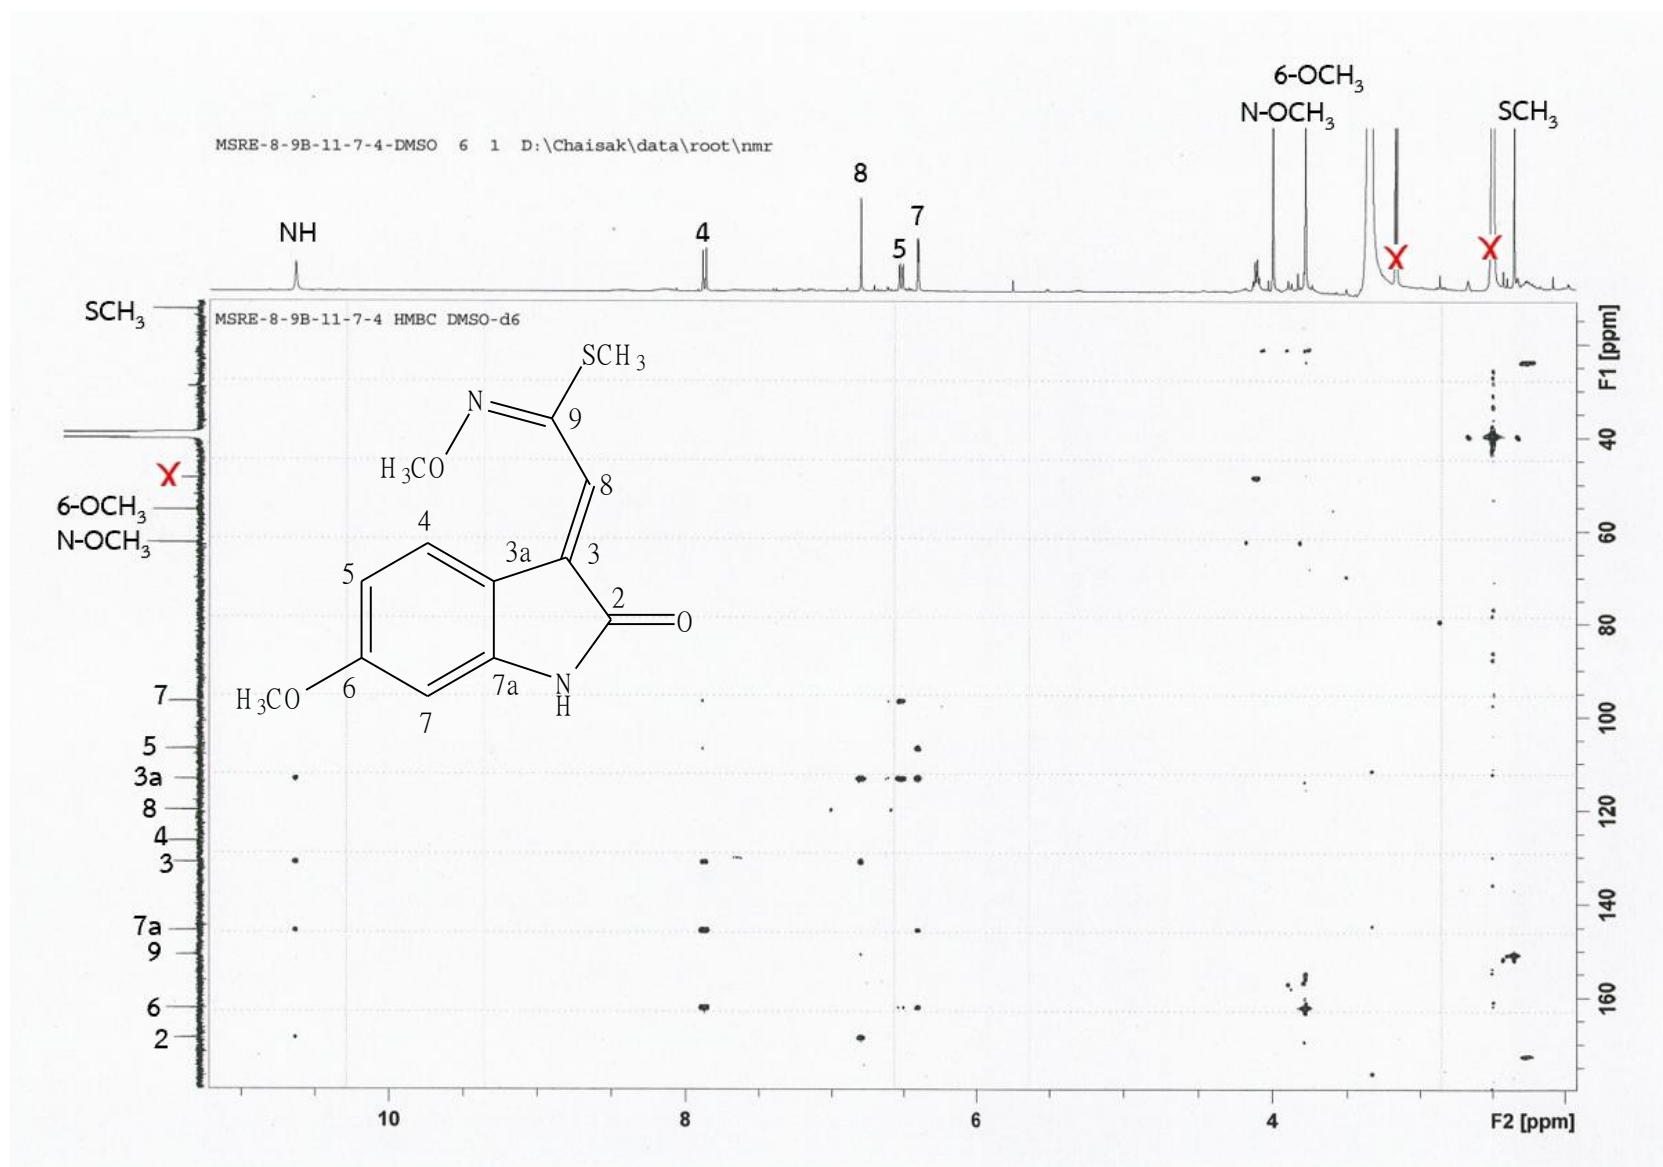

**Figure S53.** The HMBC spectrum of compound **5**

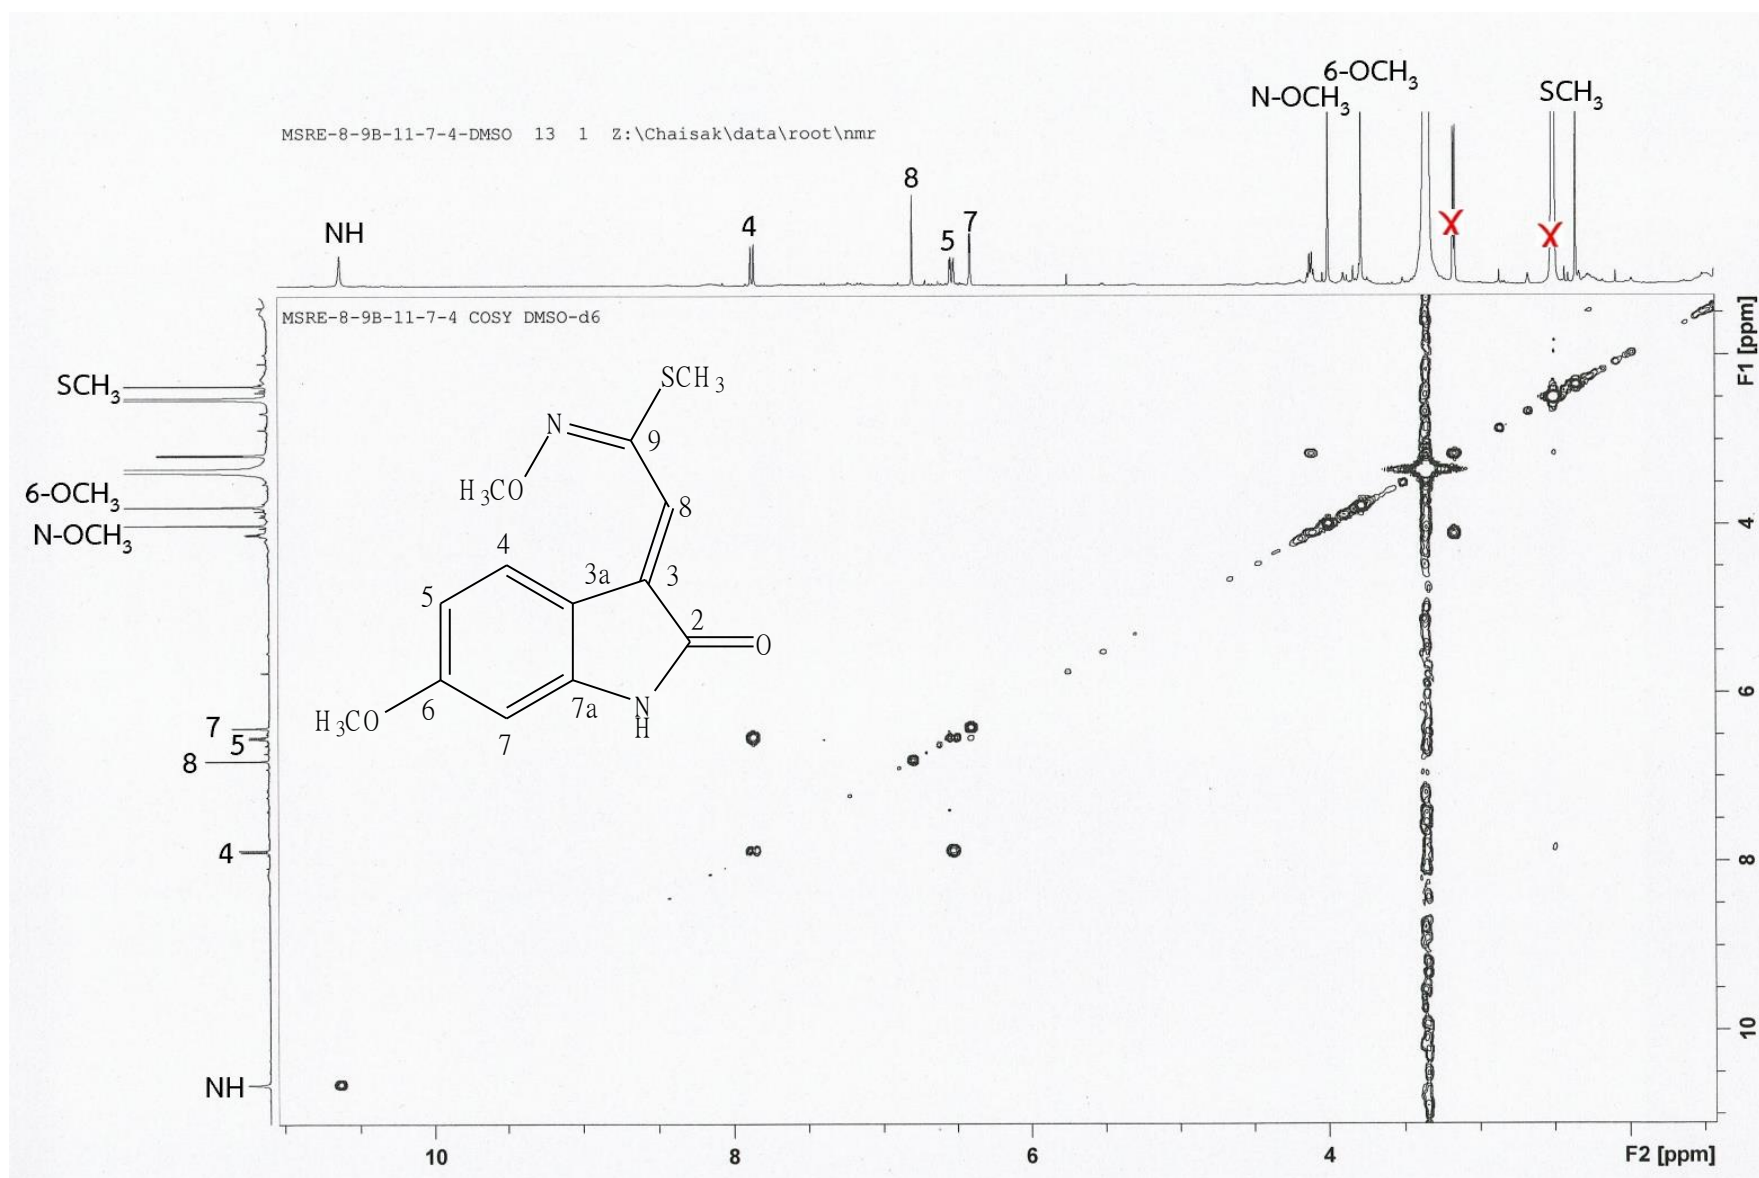

**Figure S54.** The <sup>1</sup>H-<sup>1</sup>H COSY spectrum of compound **5**

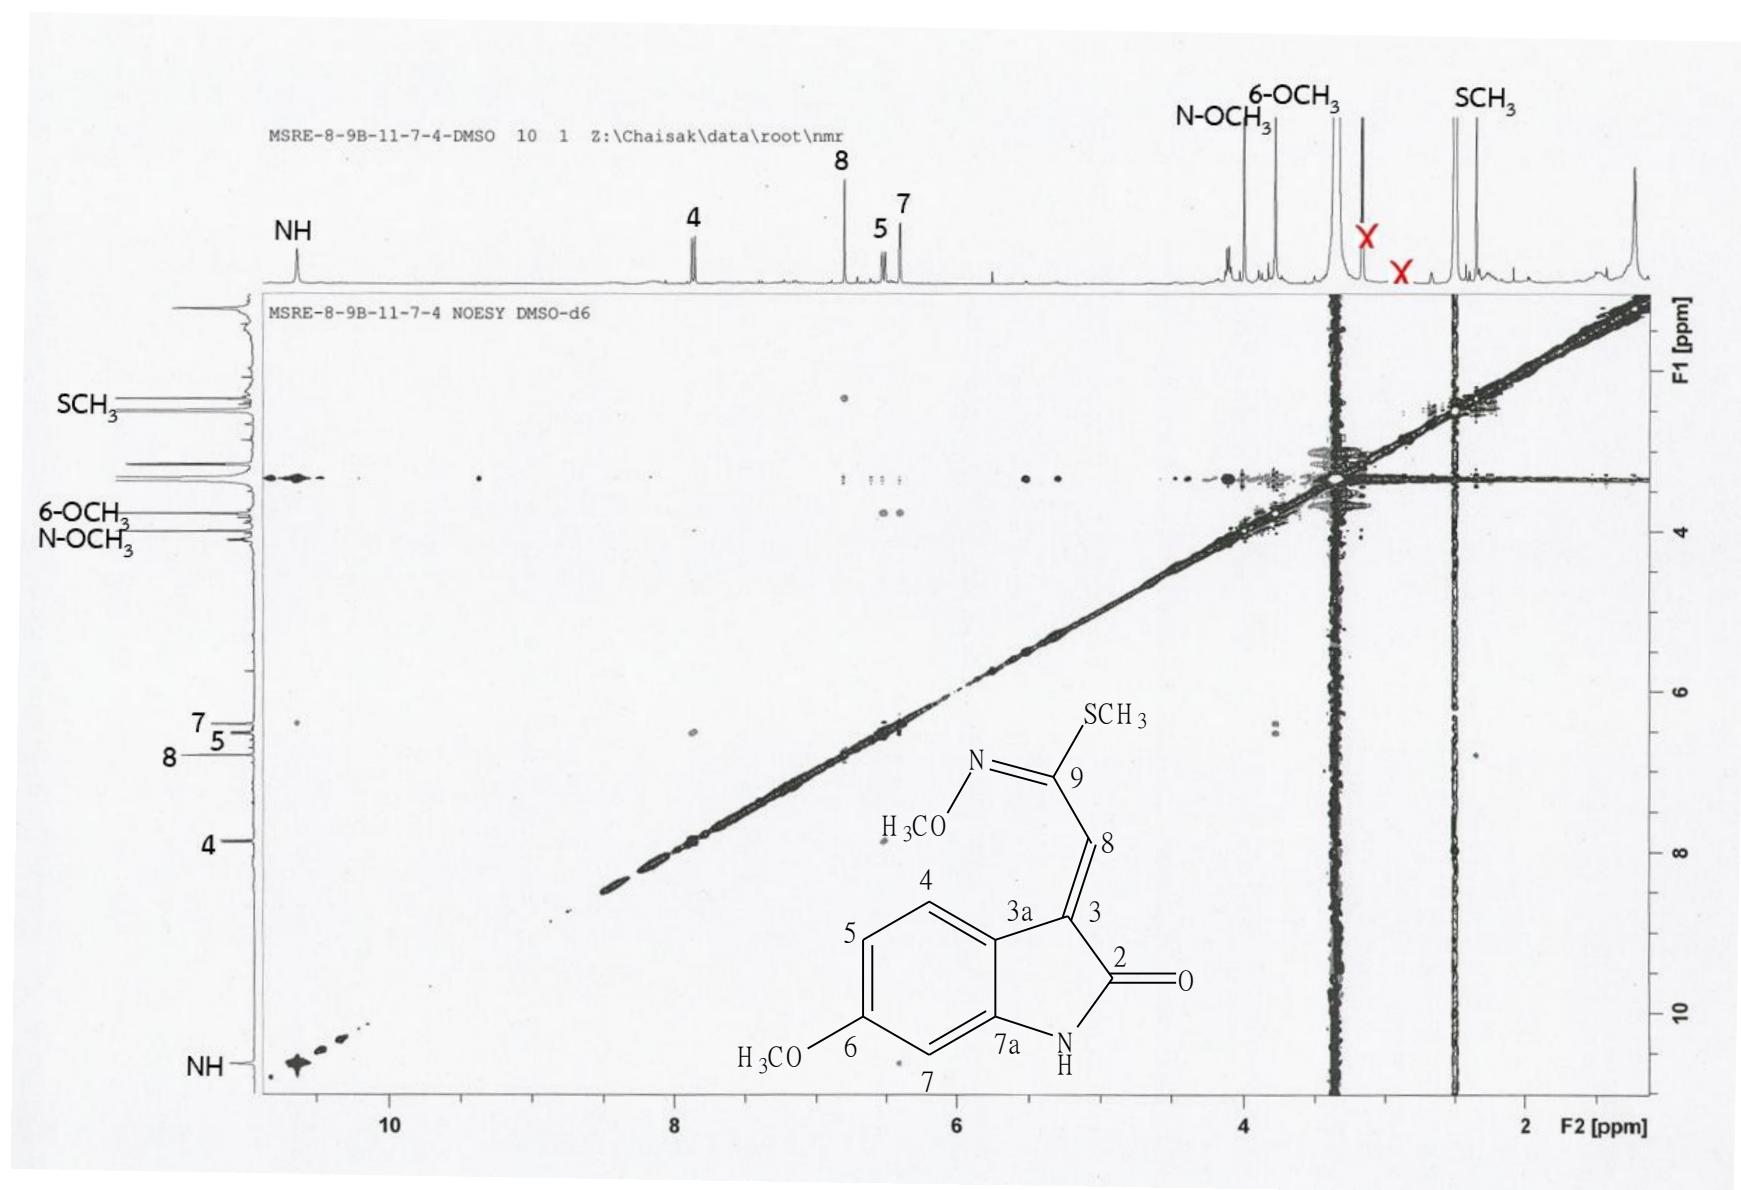

**Figure S55.** The NOESY spectrum of compound **5**

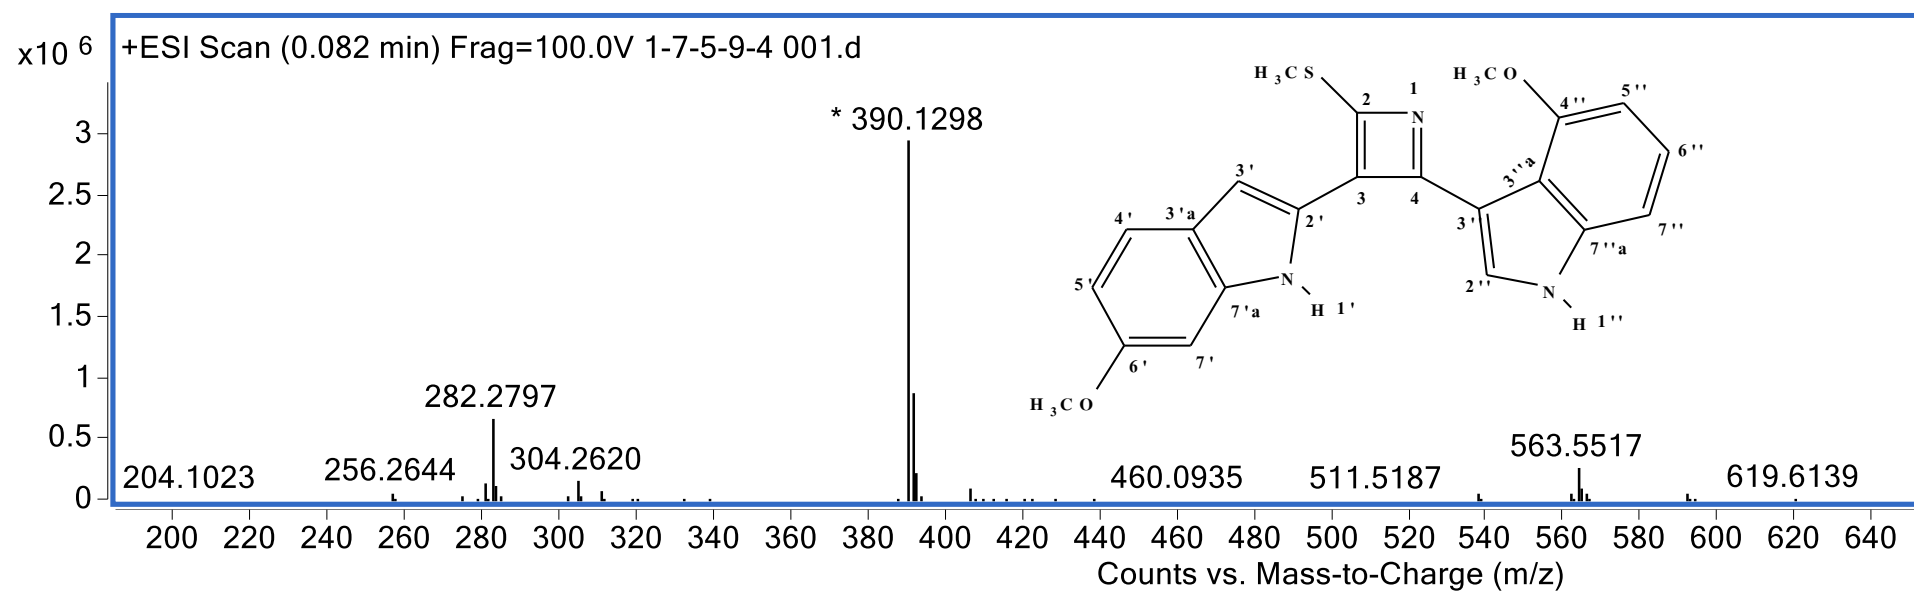

**Figure S56.** The HR-ESI-MS spectrum of compound **6**

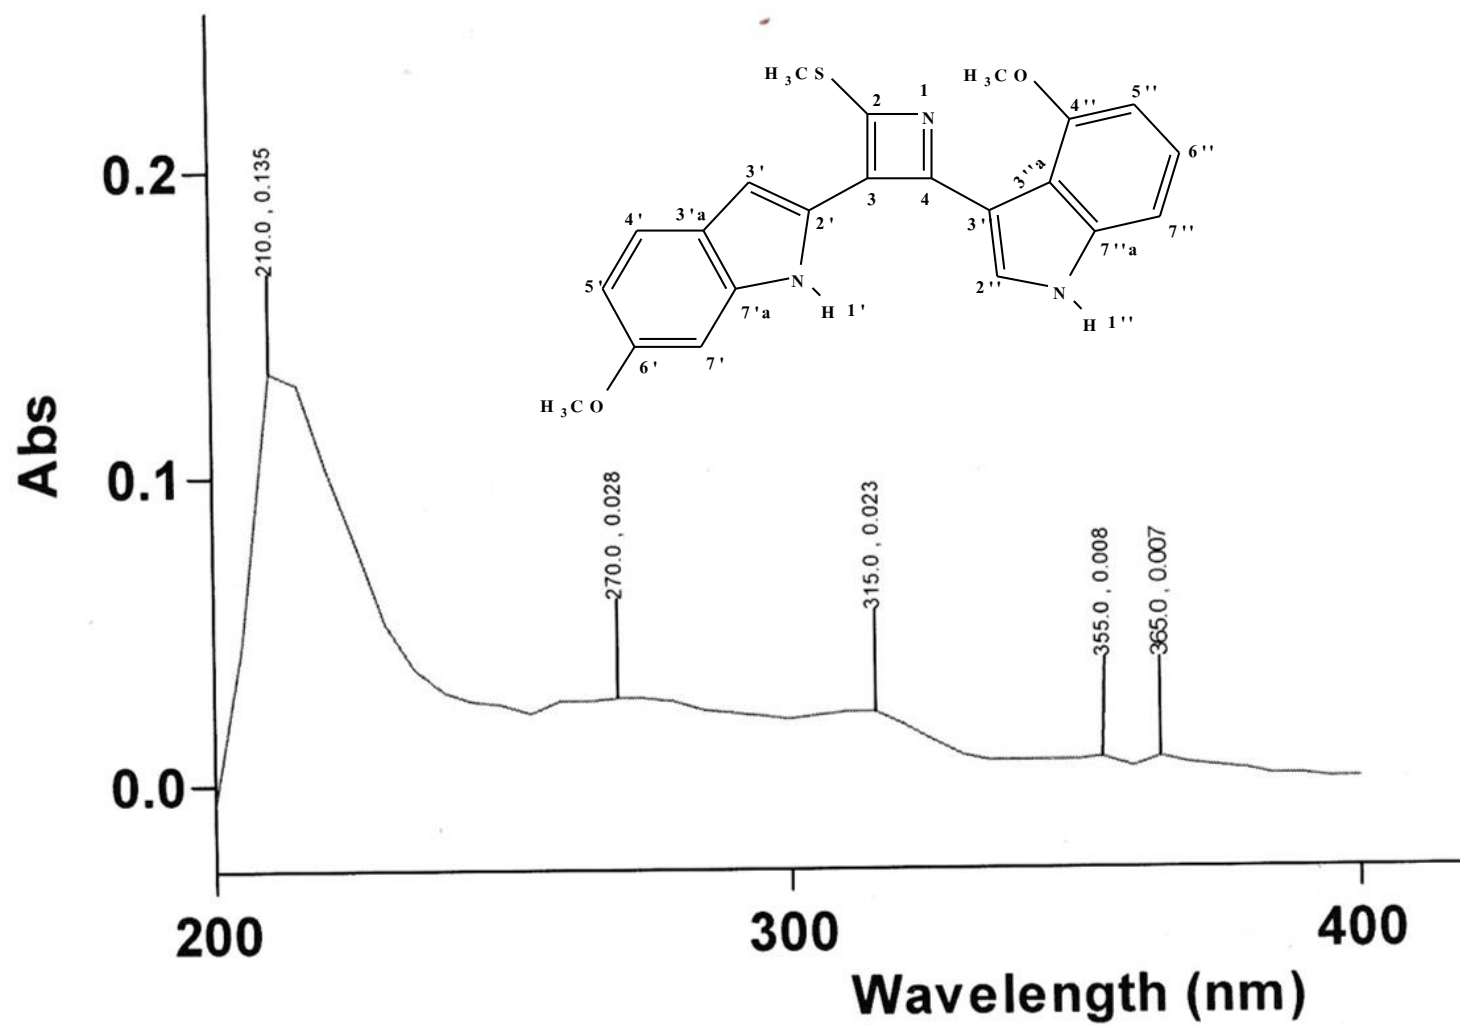

**Figure S57.** The UV spectrum of compound 6

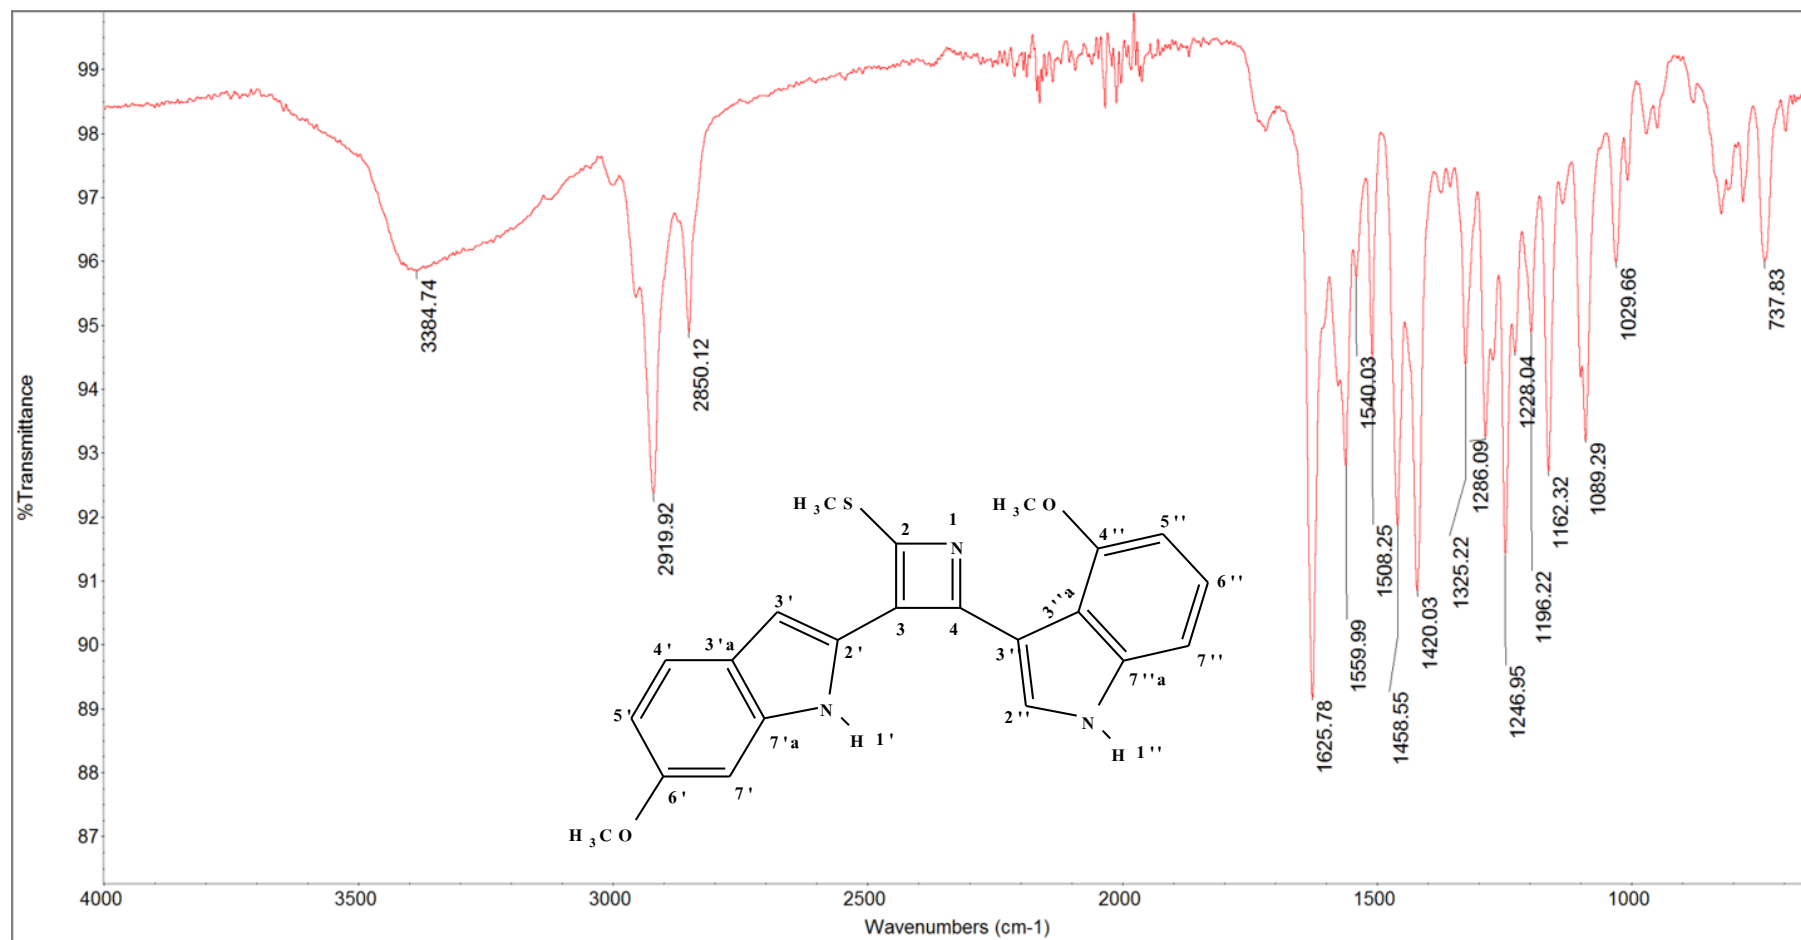

**Figure S58.** The IR spectrum of compound **6** (ATR)

MSRB-1-7-5-9-4  $^1\text{H}$  NMR (400 MHz) in  $\text{DMSO}-d_6$

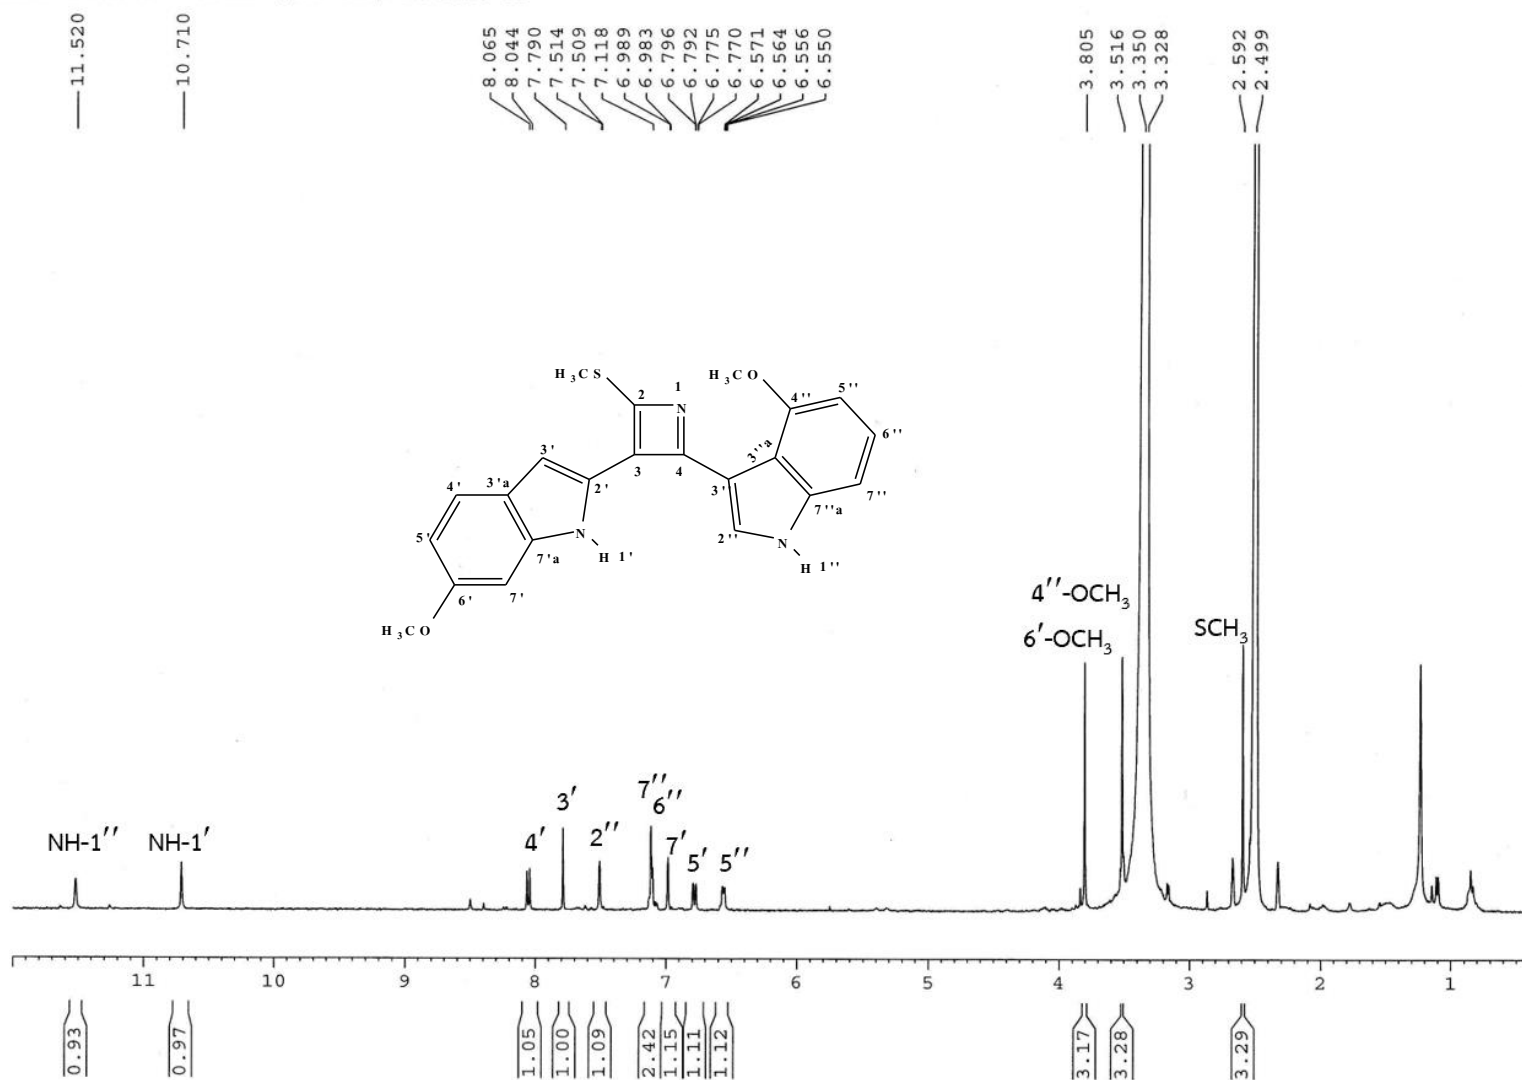

**Figure S59.** The  $^1\text{H}$  NMR (400 MHz,  $\text{DMSO}-d_6$ ) spectrum of compound **6**

MSRB-1-7-5-9-4 1H NMR (400 MHz) in DMSO-d6

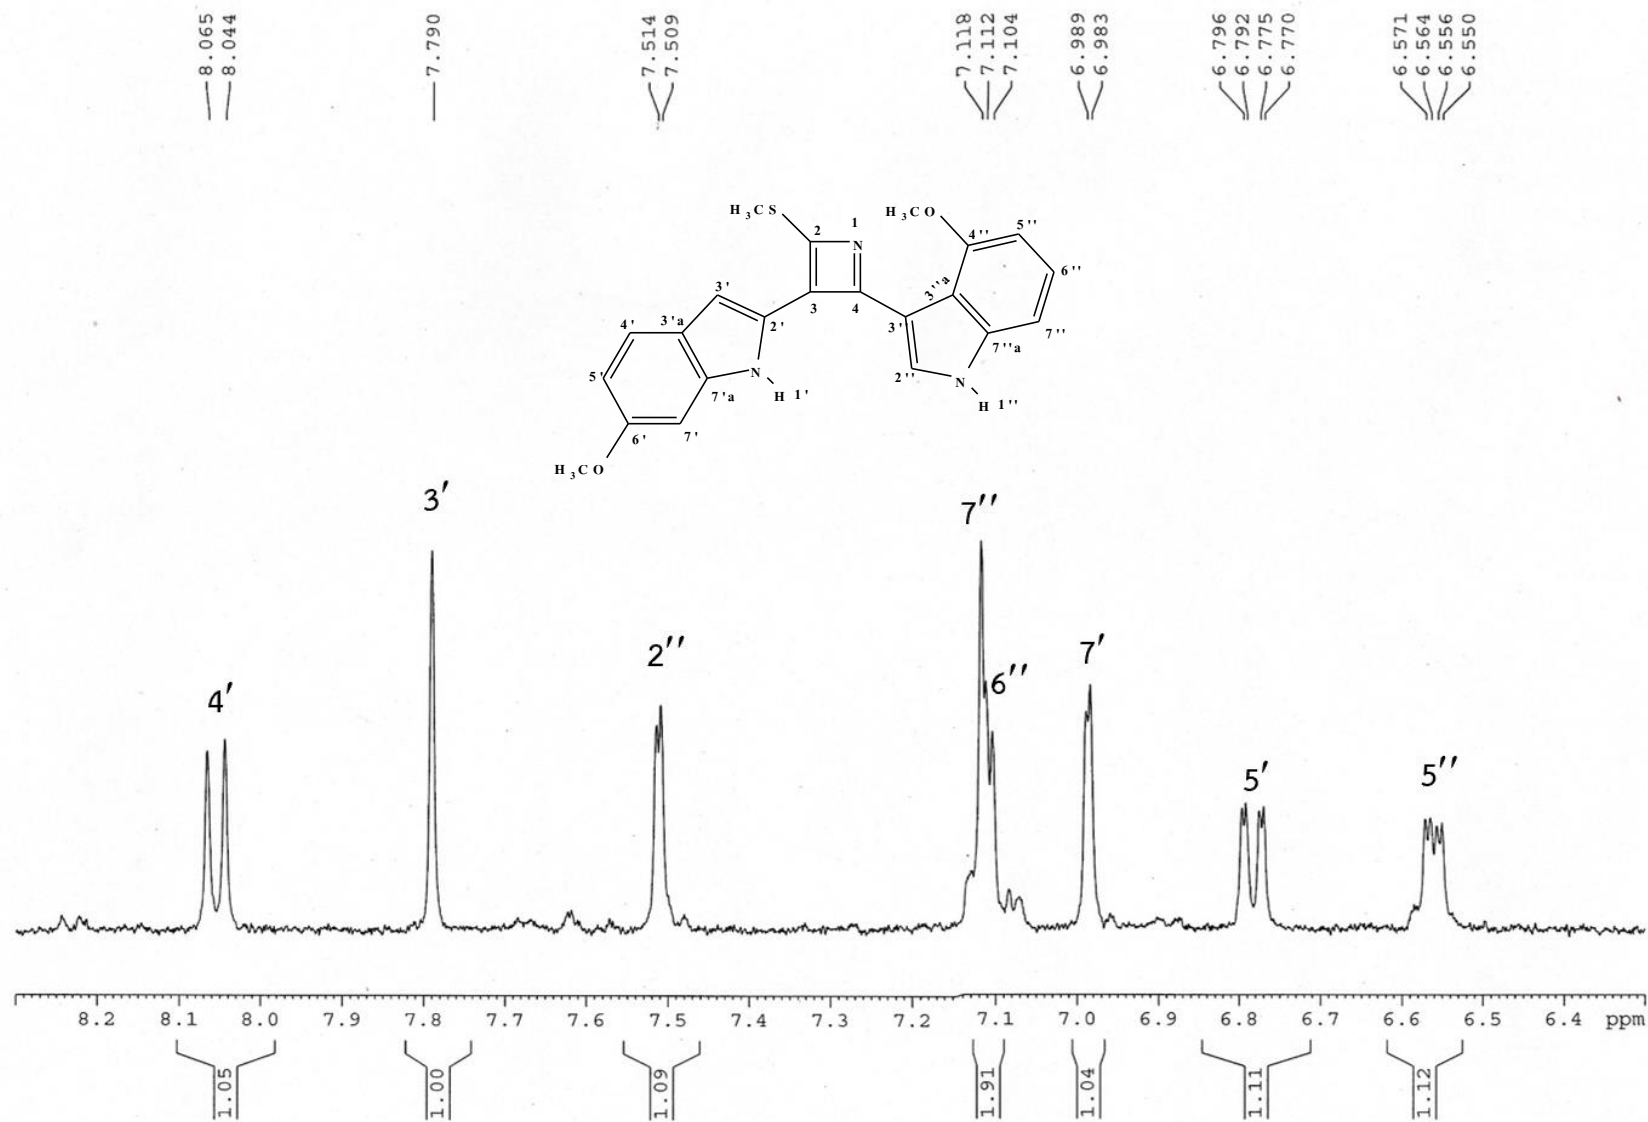

**Figure S60.** The <sup>1</sup>H NMR (400 MHz, DMSO-*d*<sub>6</sub>) spectrum of compound 6 (continued)



MSRB-1-7-5-9-4  $^{13}\text{C}$  NMR (100 MHz) in  $\text{DMSO}-d_6$

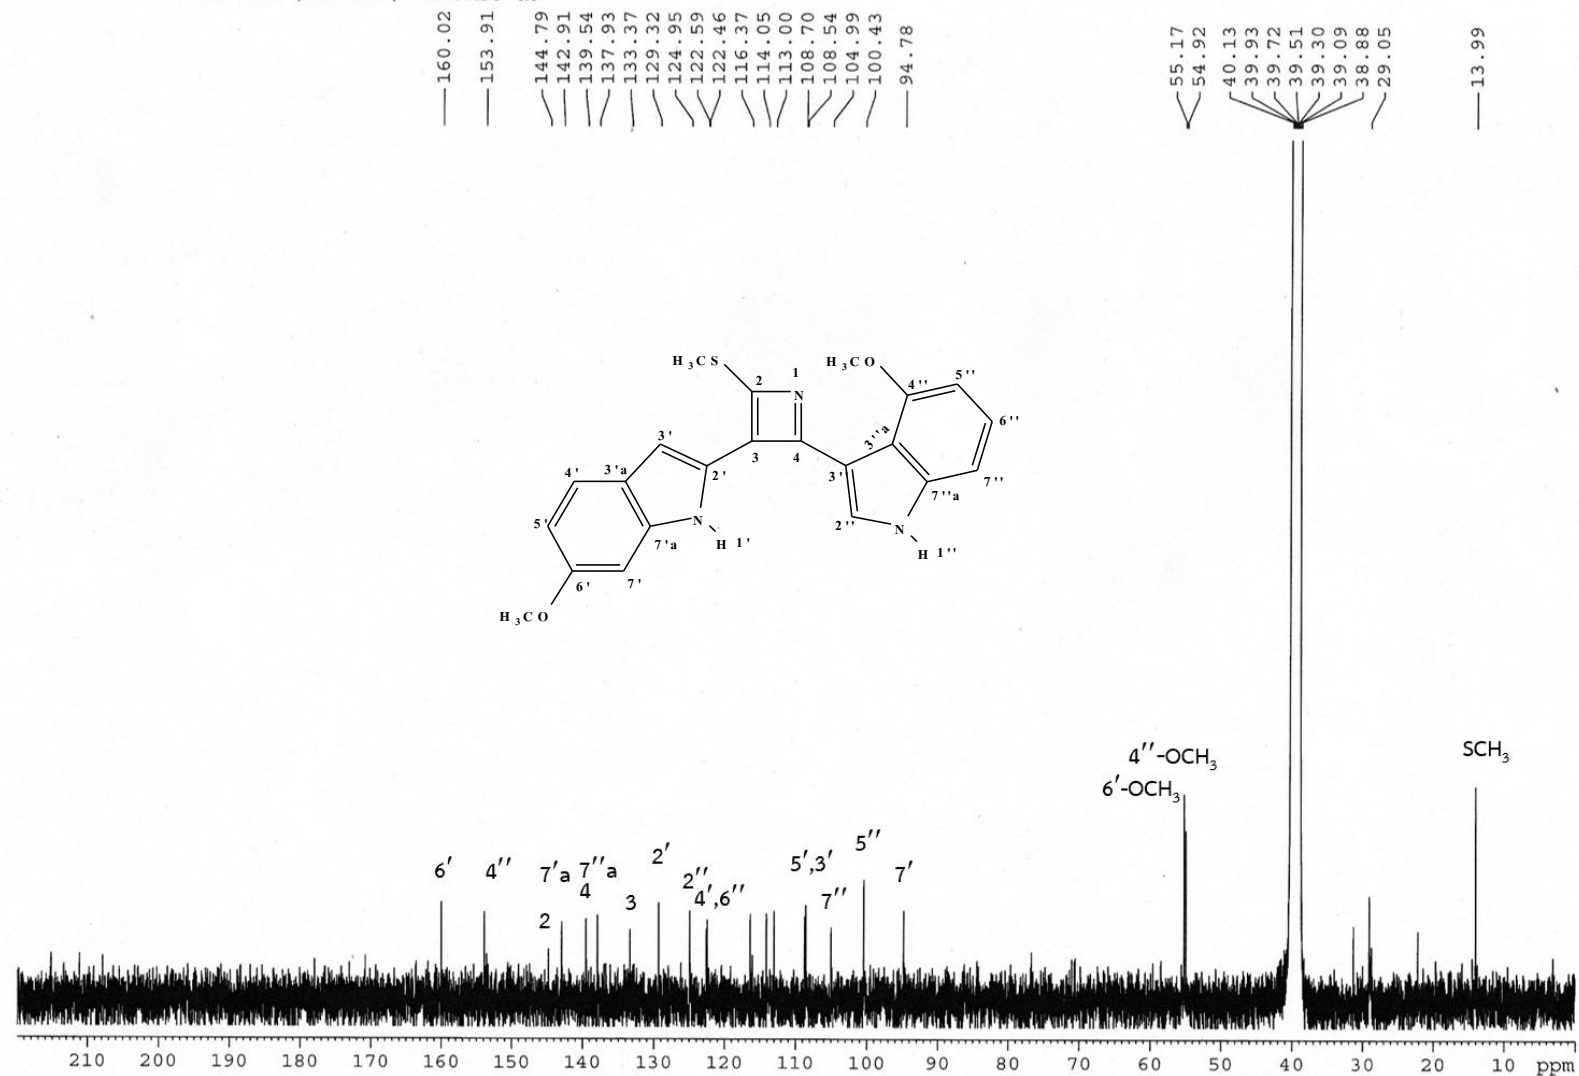

**Figure S61.** The  $^{13}\text{C}$  NMR (100 MHz,  $\text{DMSO}-d_6$ ) spectrum of compound **6**

MSRB-1-7-5-9-4  $^{13}\text{C}$  NMR (100 MHz) in  $\text{DMSO}-d_6$

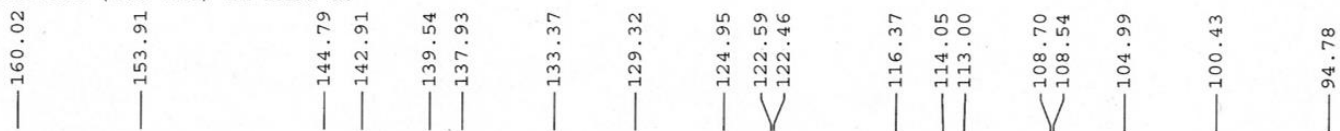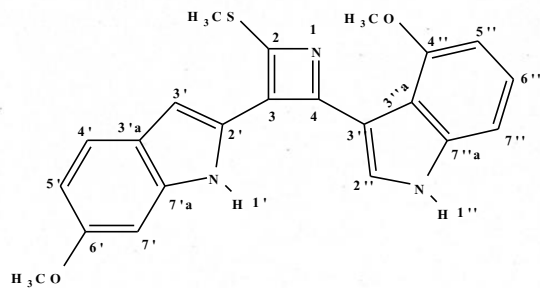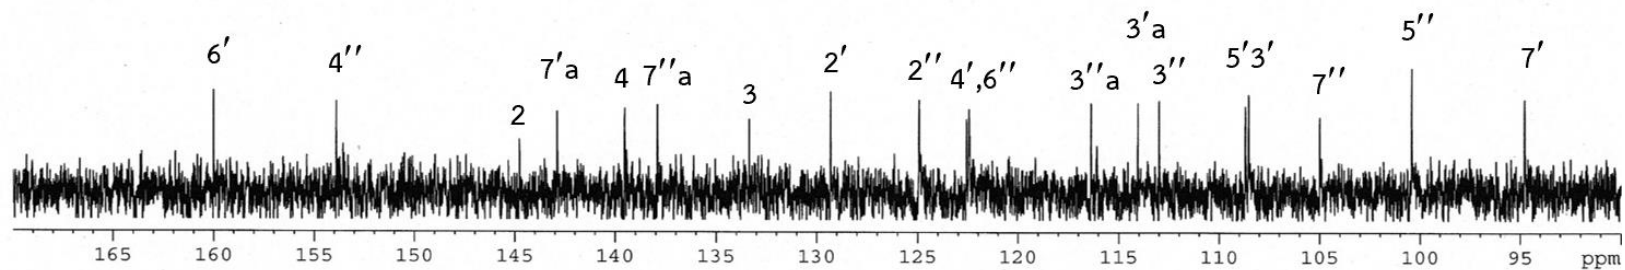

**Figure S62.** The  $^{13}\text{C}$  NMR (100 MHz,  $\text{DMSO}-d_6$ ) spectrum of compound **6** (continued)

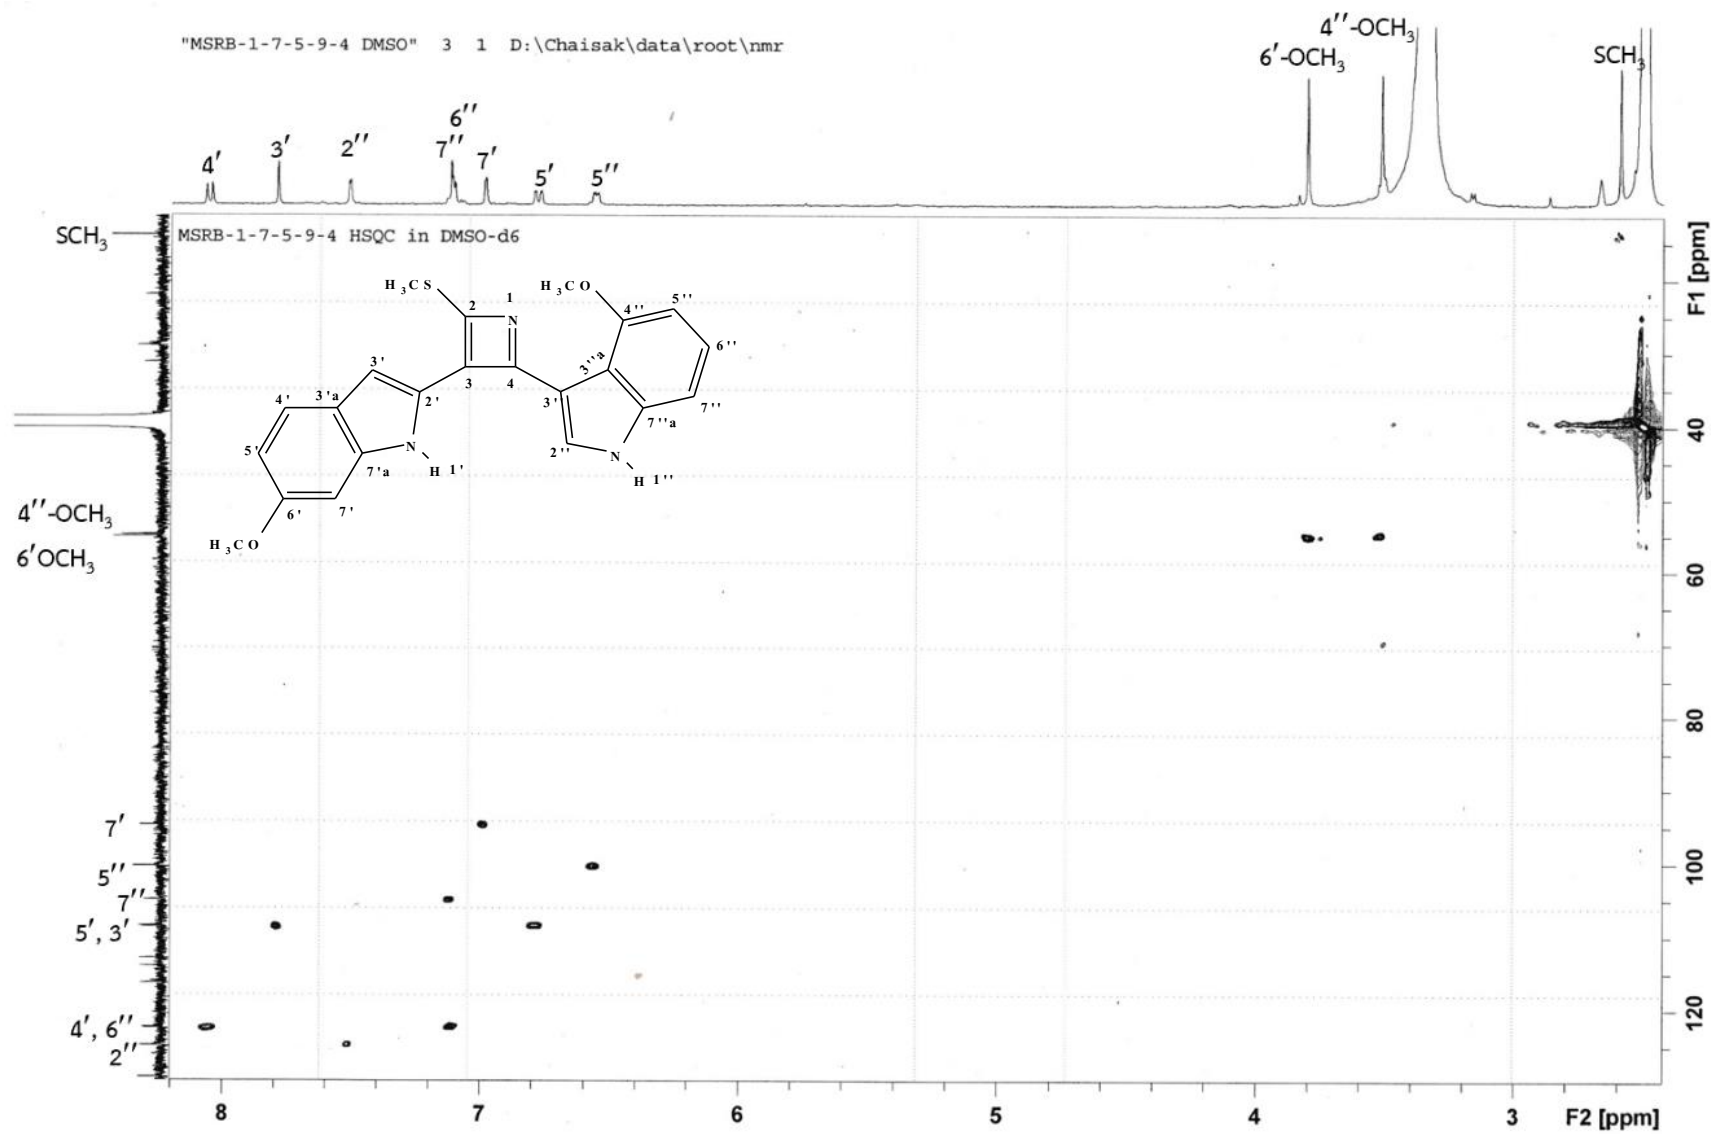

**Figure S63.** The HSQC spectrum of compound **6**

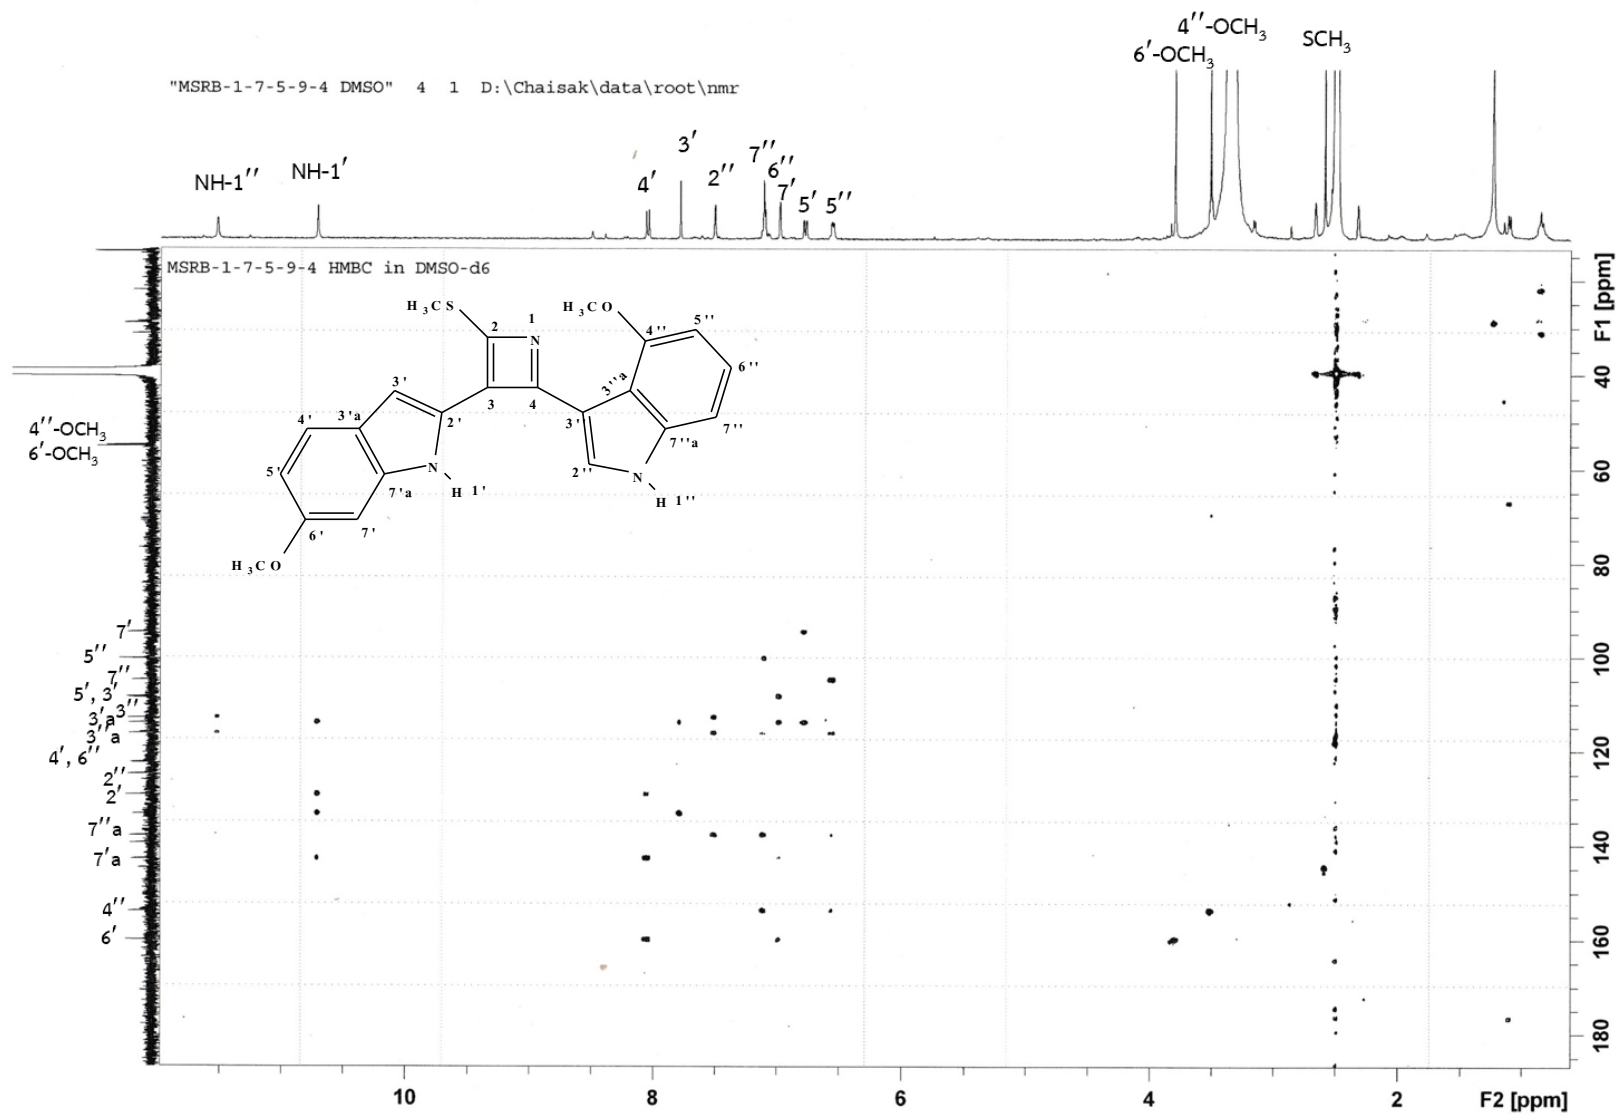

**Figure S64.** The HMBC spectrum of compound **6**

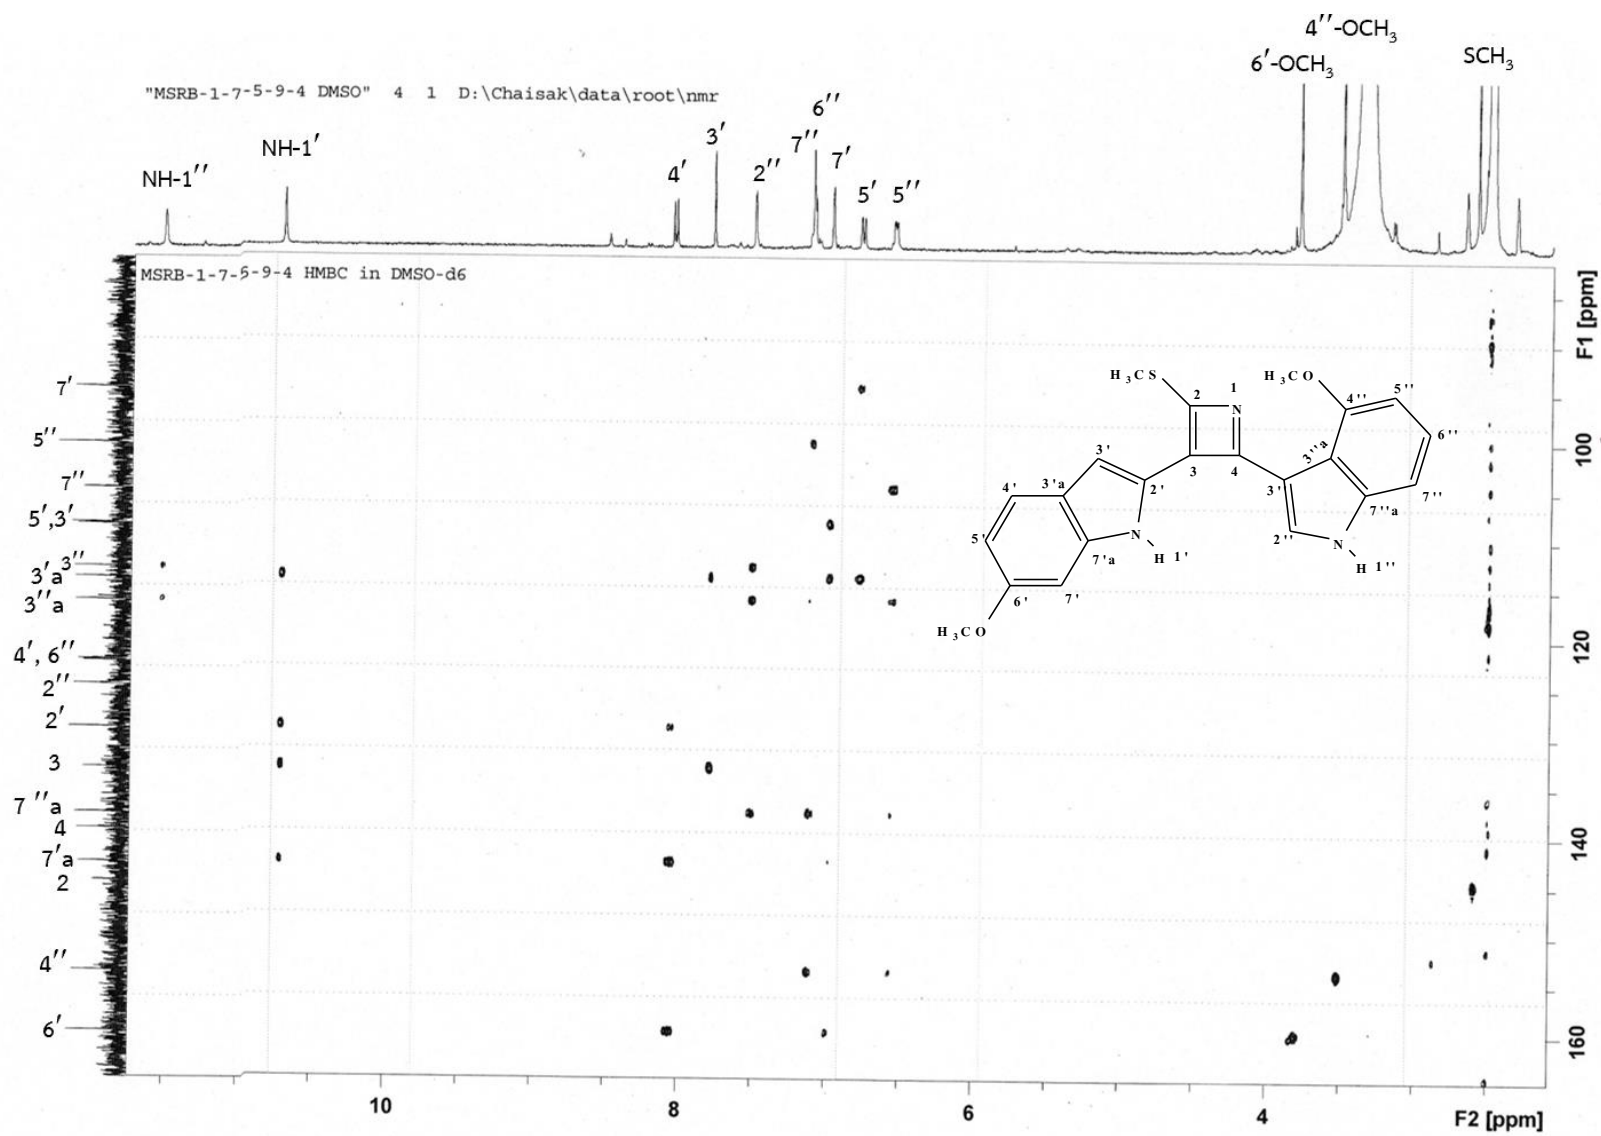

**Figure S65.** The HMBC spectrum of compound 6 (continued)

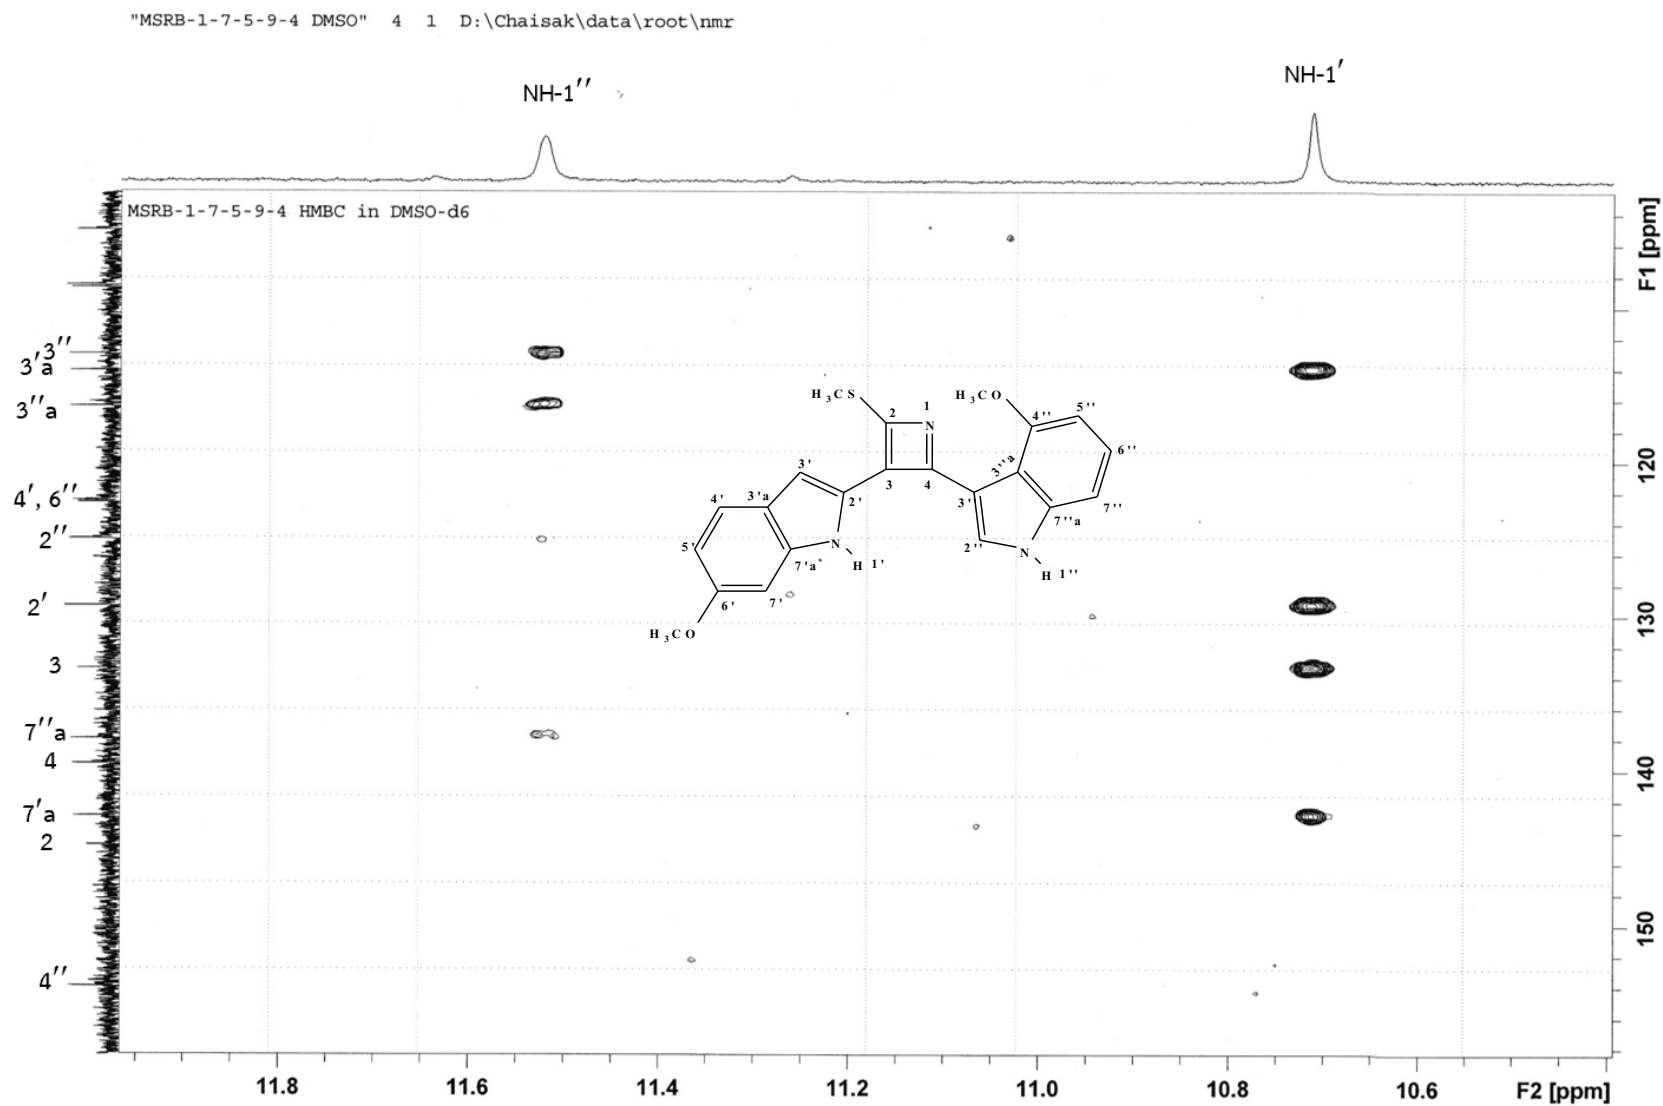

**Figure S66.** The HMBC spectrum of compound **6** (continued)

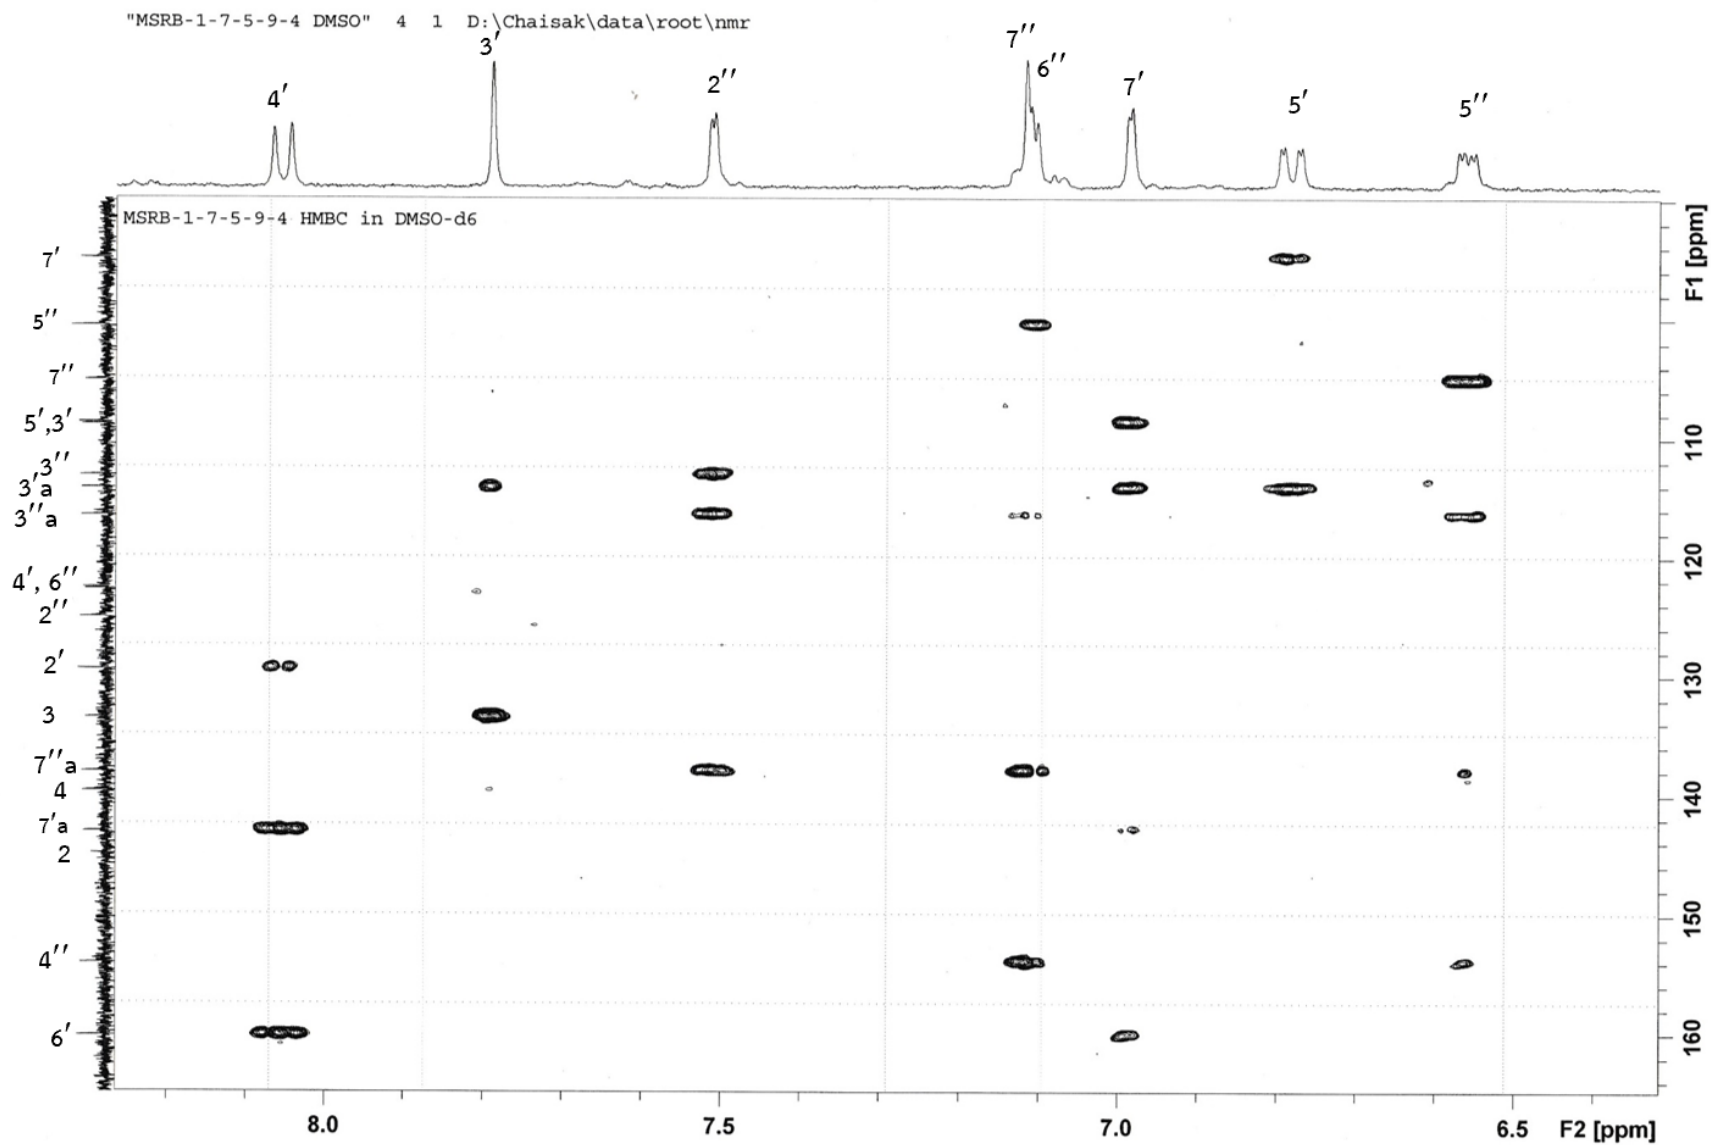

**Figure S67.** The HMBC spectrum of compound **6** (continued)

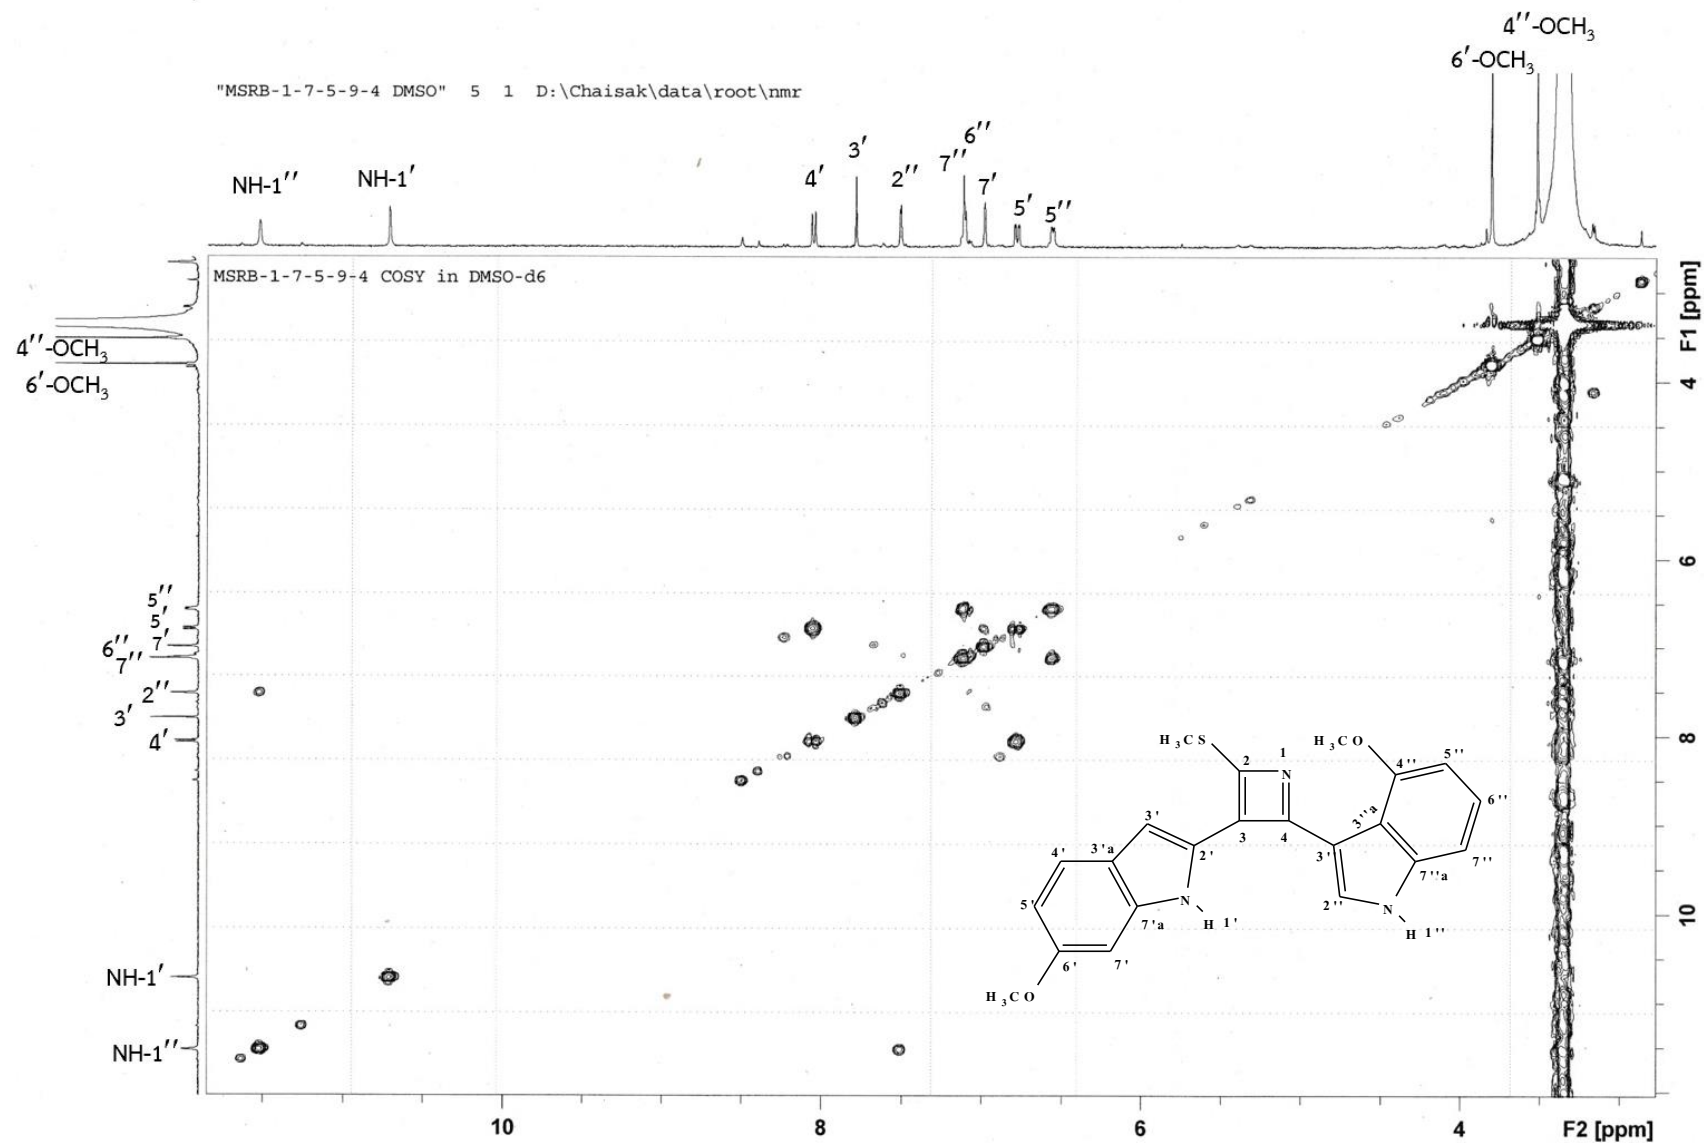

**Figure S68.** The  $^1\text{H}$ - $^1\text{H}$  COSY spectrum of compound **6**





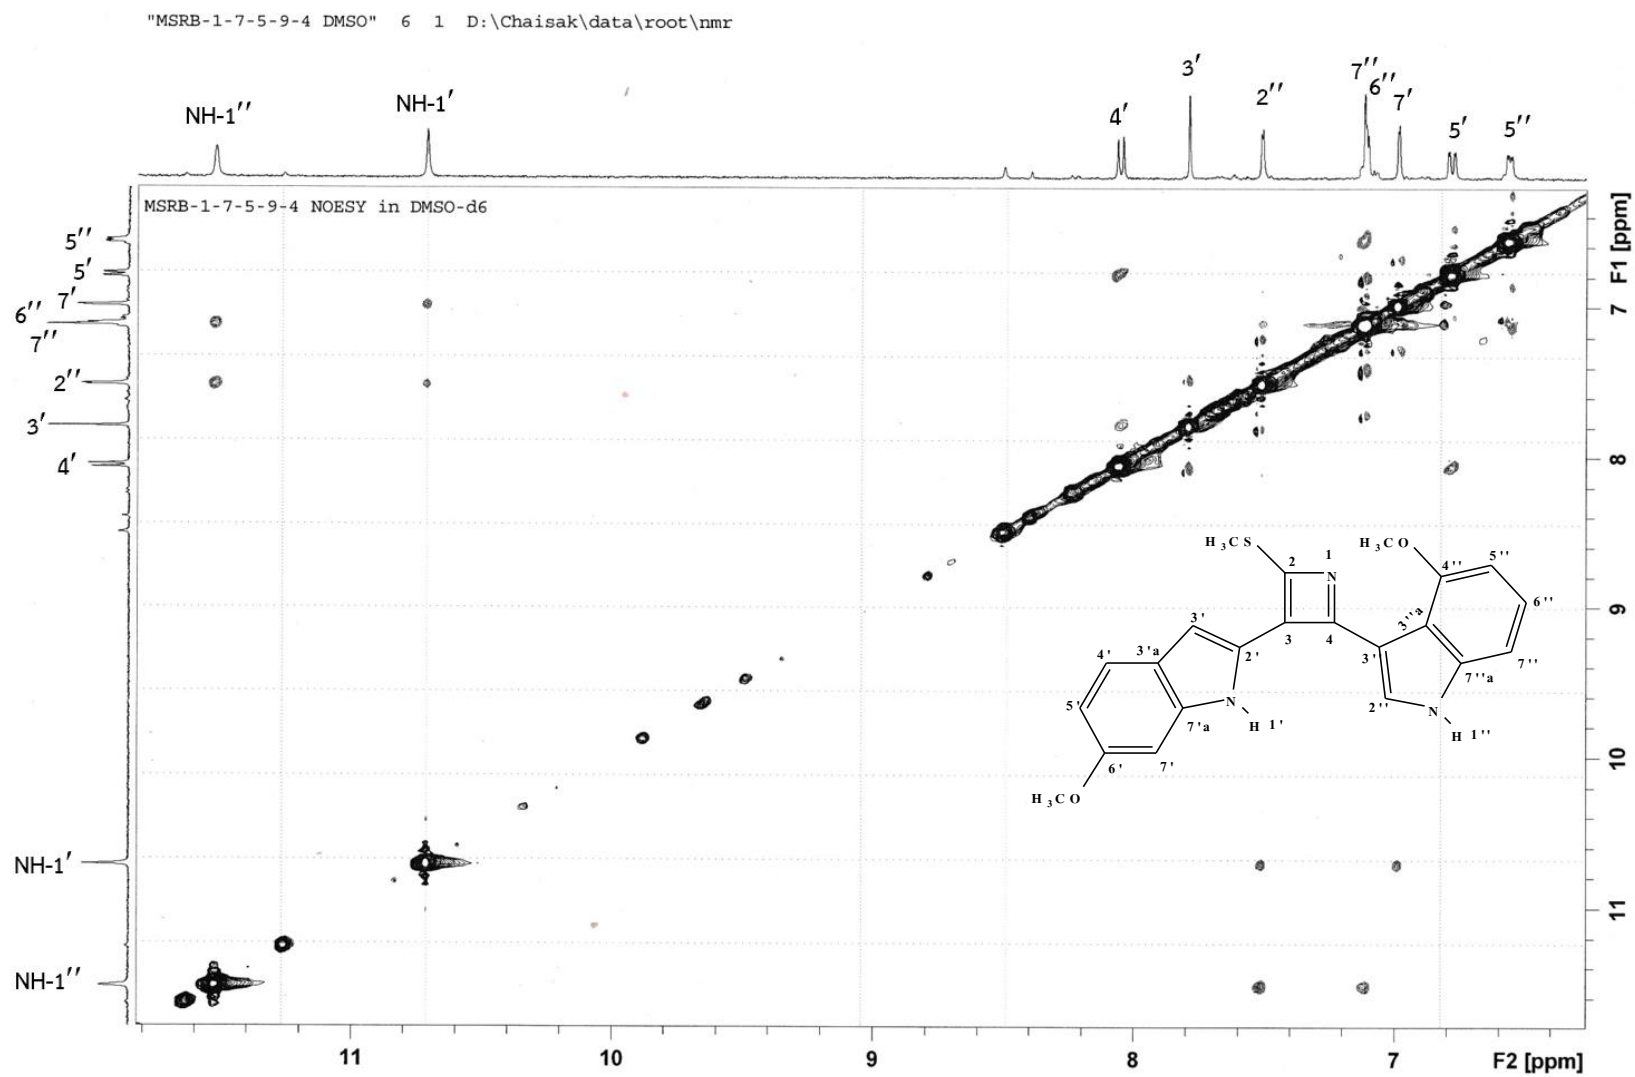

**Figure S70.** The NOESY spectrum of compound **6** (continued)

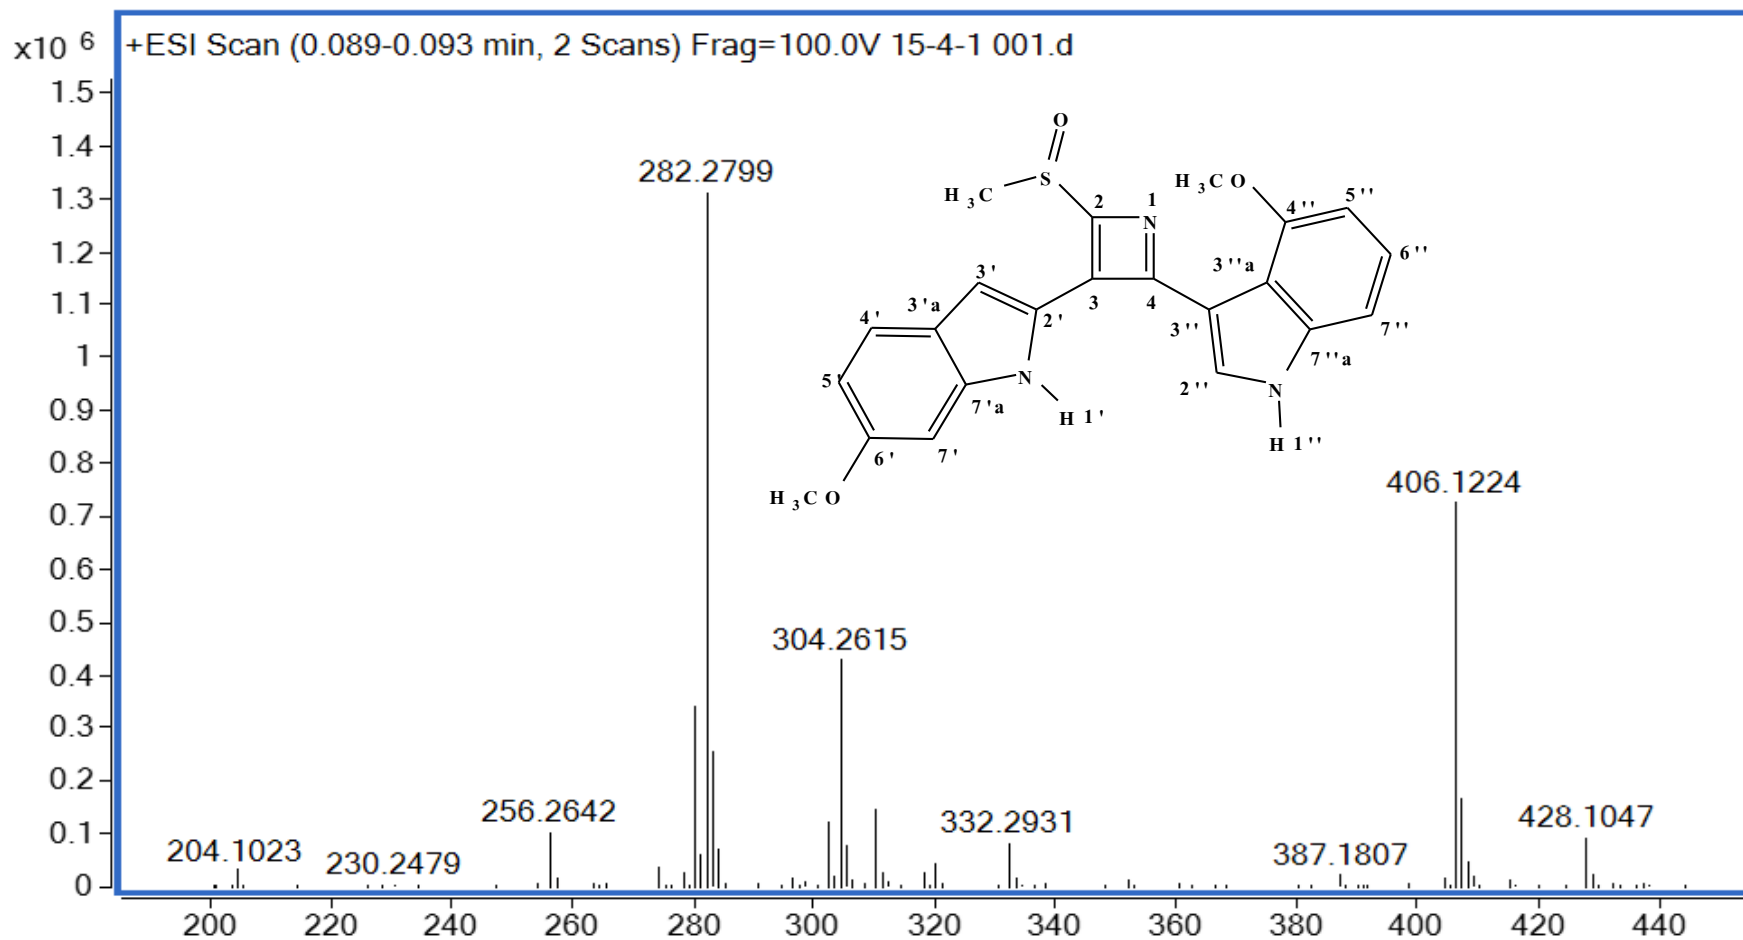

**Figure S71.** The HR-ESI-MS spectrum of compound **7**

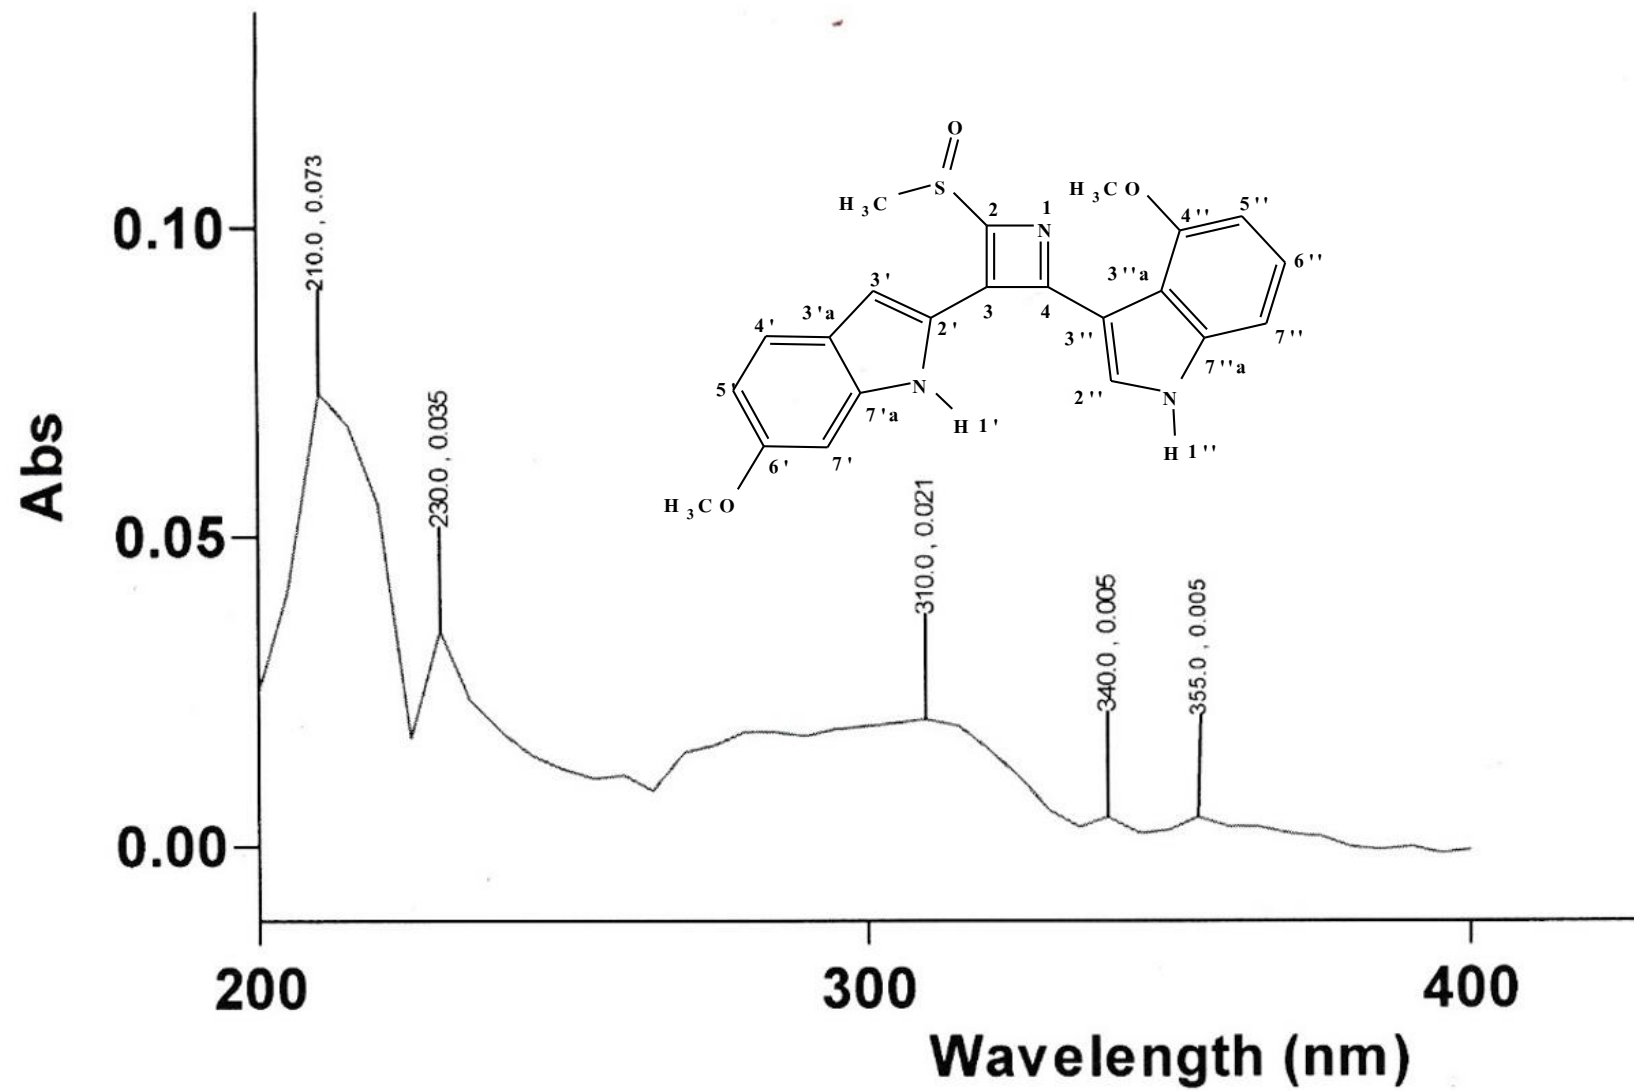

**Figure S72.** The UV spectrum of compound 7

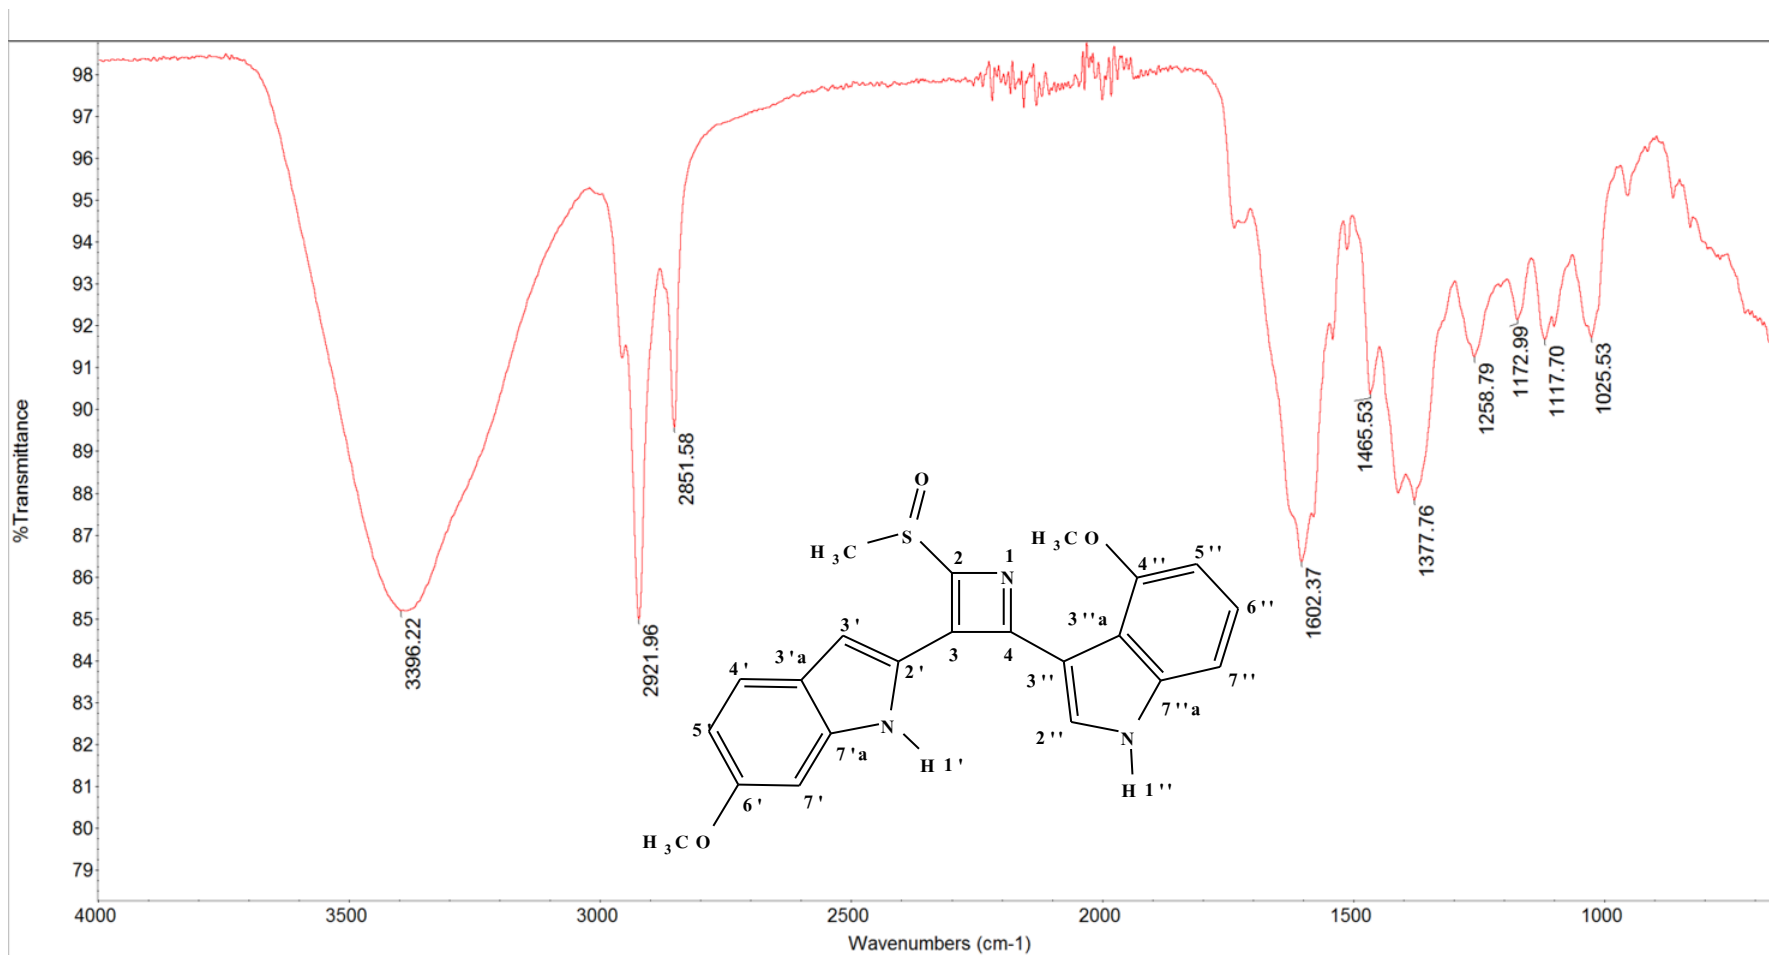

**Figure S73.** The IR spectrum of compound **7** (ATR)

MSRB-15-4-1  $^1\text{H}$ -NMR (400 MHz) in MeOD

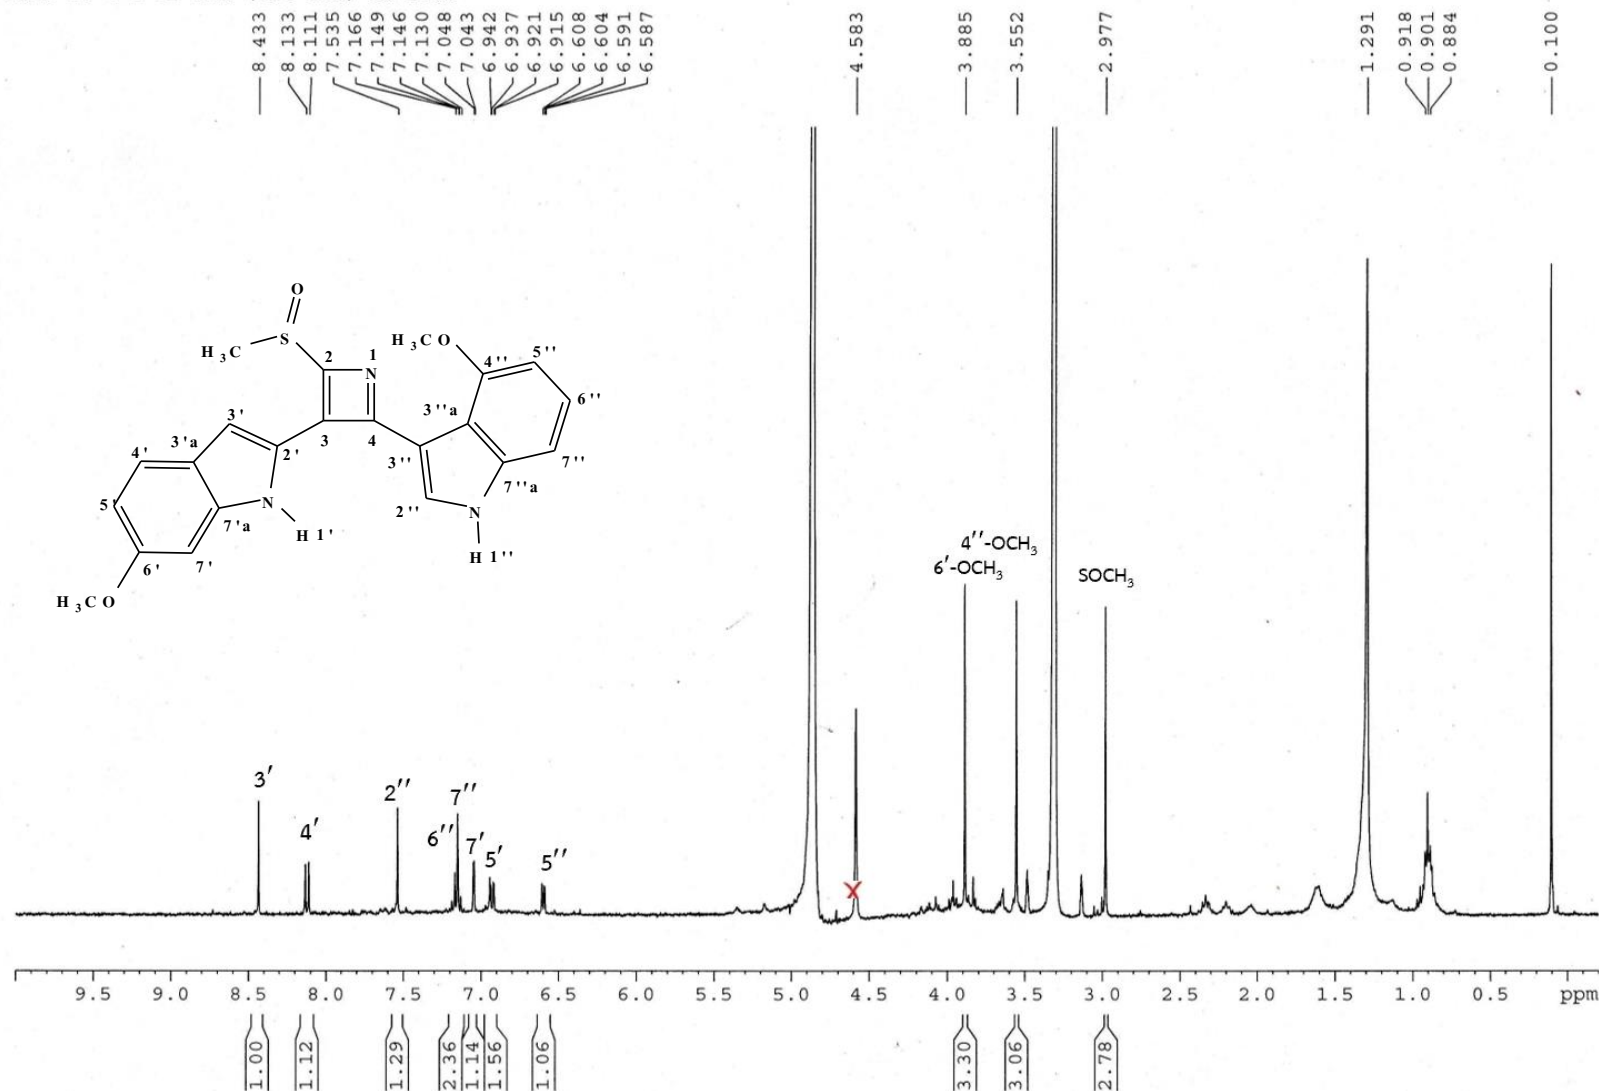

**Figure S74.** The  $^1\text{H}$  NMR (400 MHz,  $\text{CD}_3\text{OD}$ ) spectrum of compound **7**

MSRB-15-4-1  $^1\text{H}$ -NMR (400 MHz) in MeOD

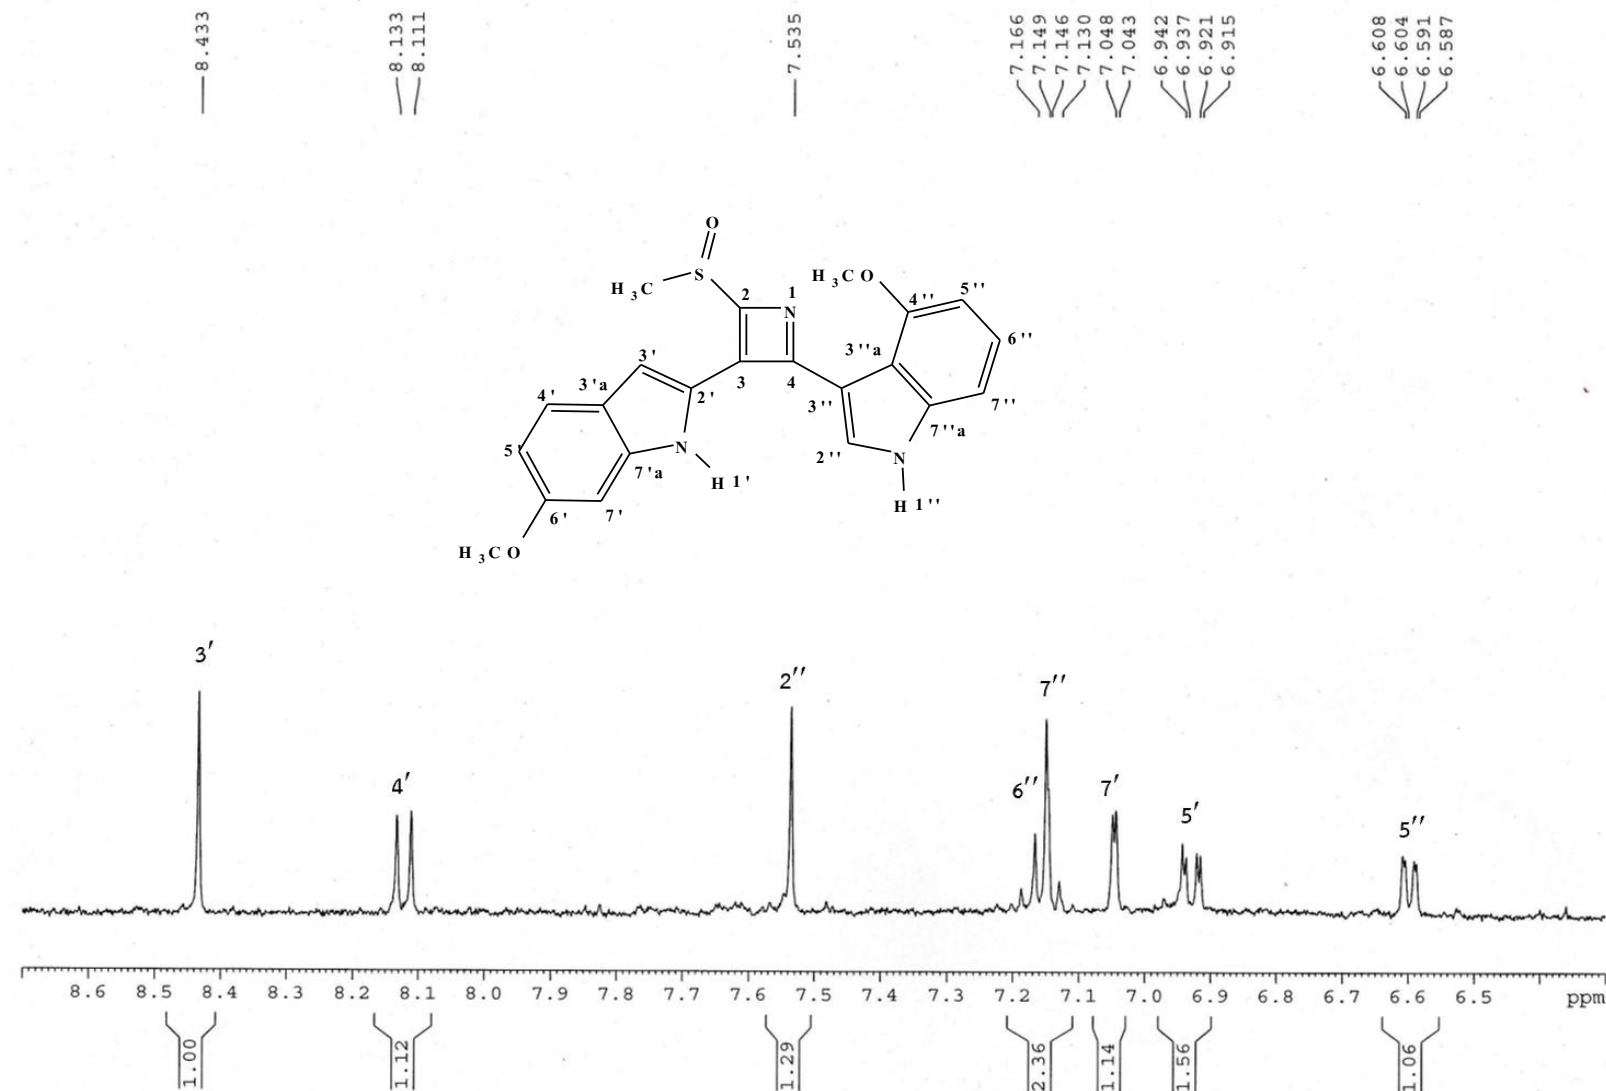

**Figure S75.** The  $^1\text{H}$  NMR (400 MHz,  $\text{CD}_3\text{OD}$ ) spectrum of compound **7** (continued)

MSRB-15-4-1  $^{13}\text{C}$ -NMR (100 MHz) in MeOD

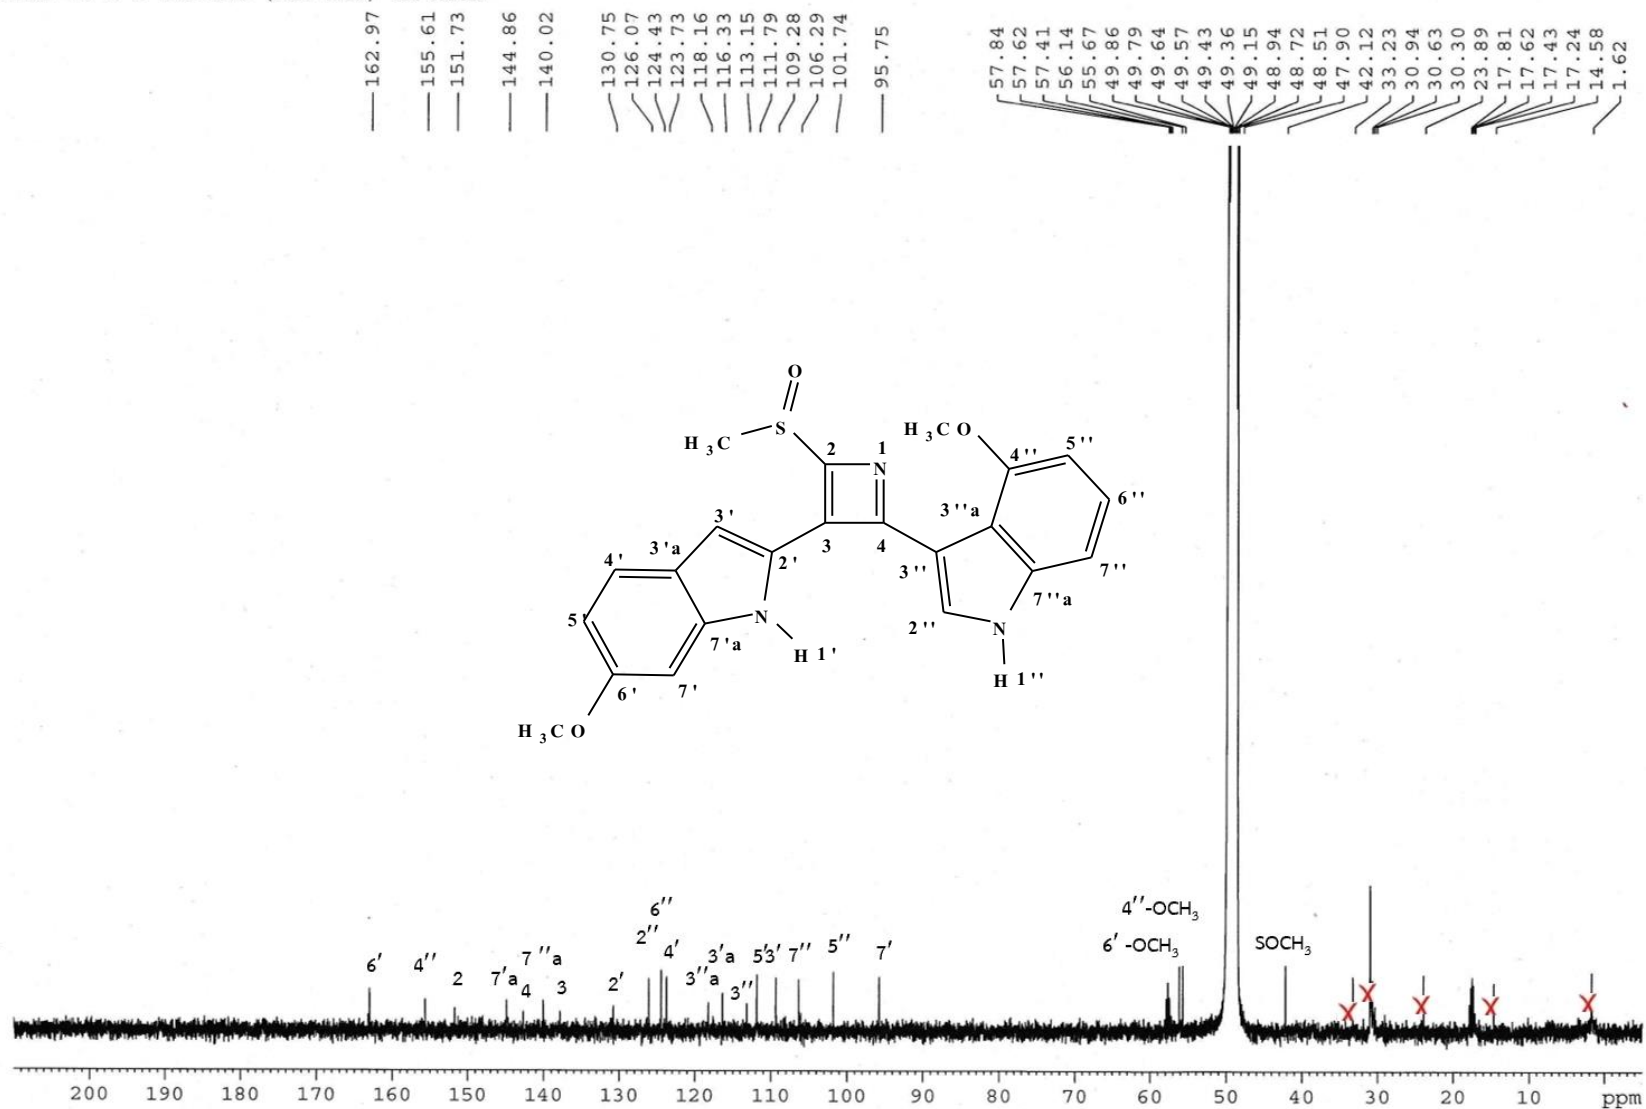

**Figure S76.** The  $^{13}\text{C}$  NMR (100 MHz,  $\text{CD}_3\text{OD}$ ) spectrum of compound **7**



MSRB-15-4-1 HSQC in MeOD

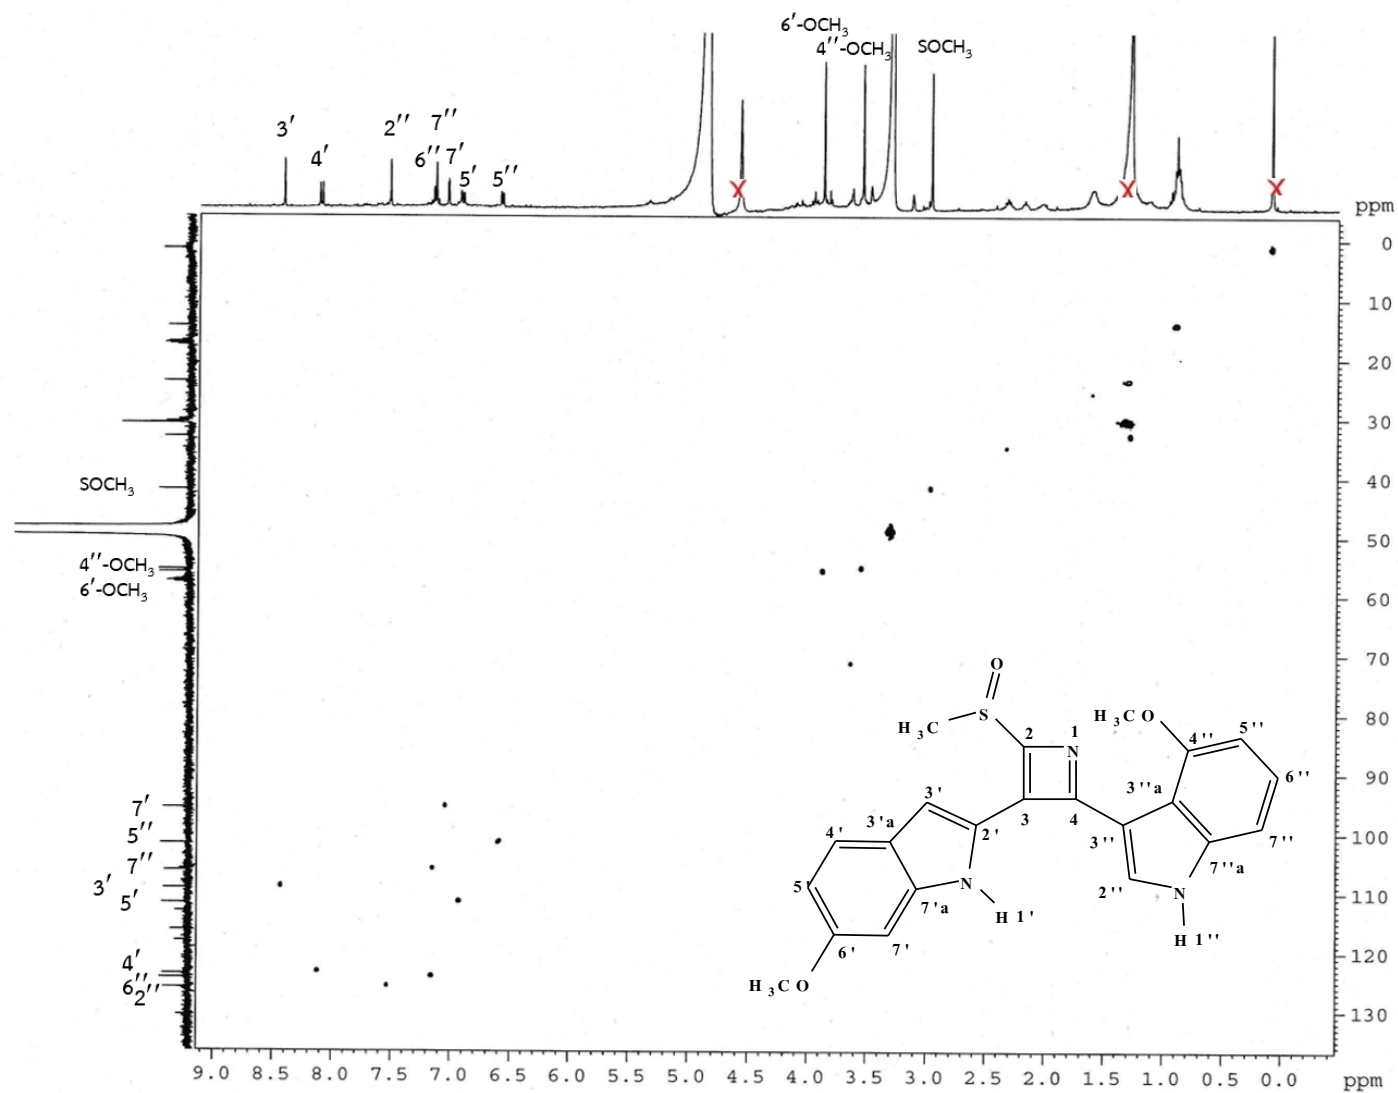

**Figure S77.** The HSQC spectrum of compound 7

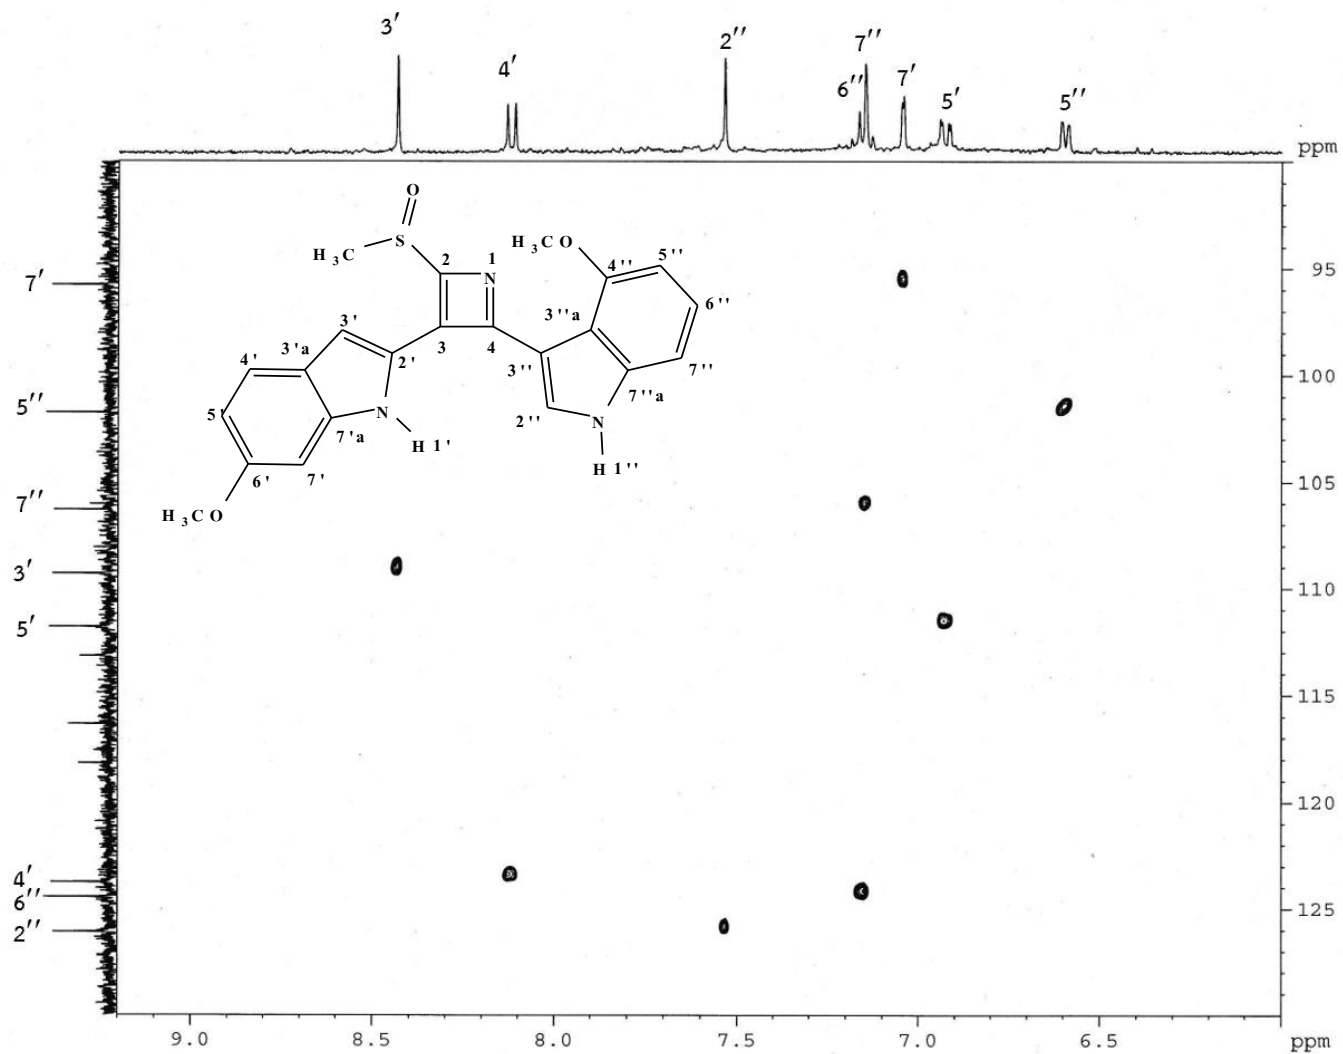

**Figure S78.** The HSQC spectrum of compound **7** (continued)

MSRB-15-4-1 HMBC in MeOD

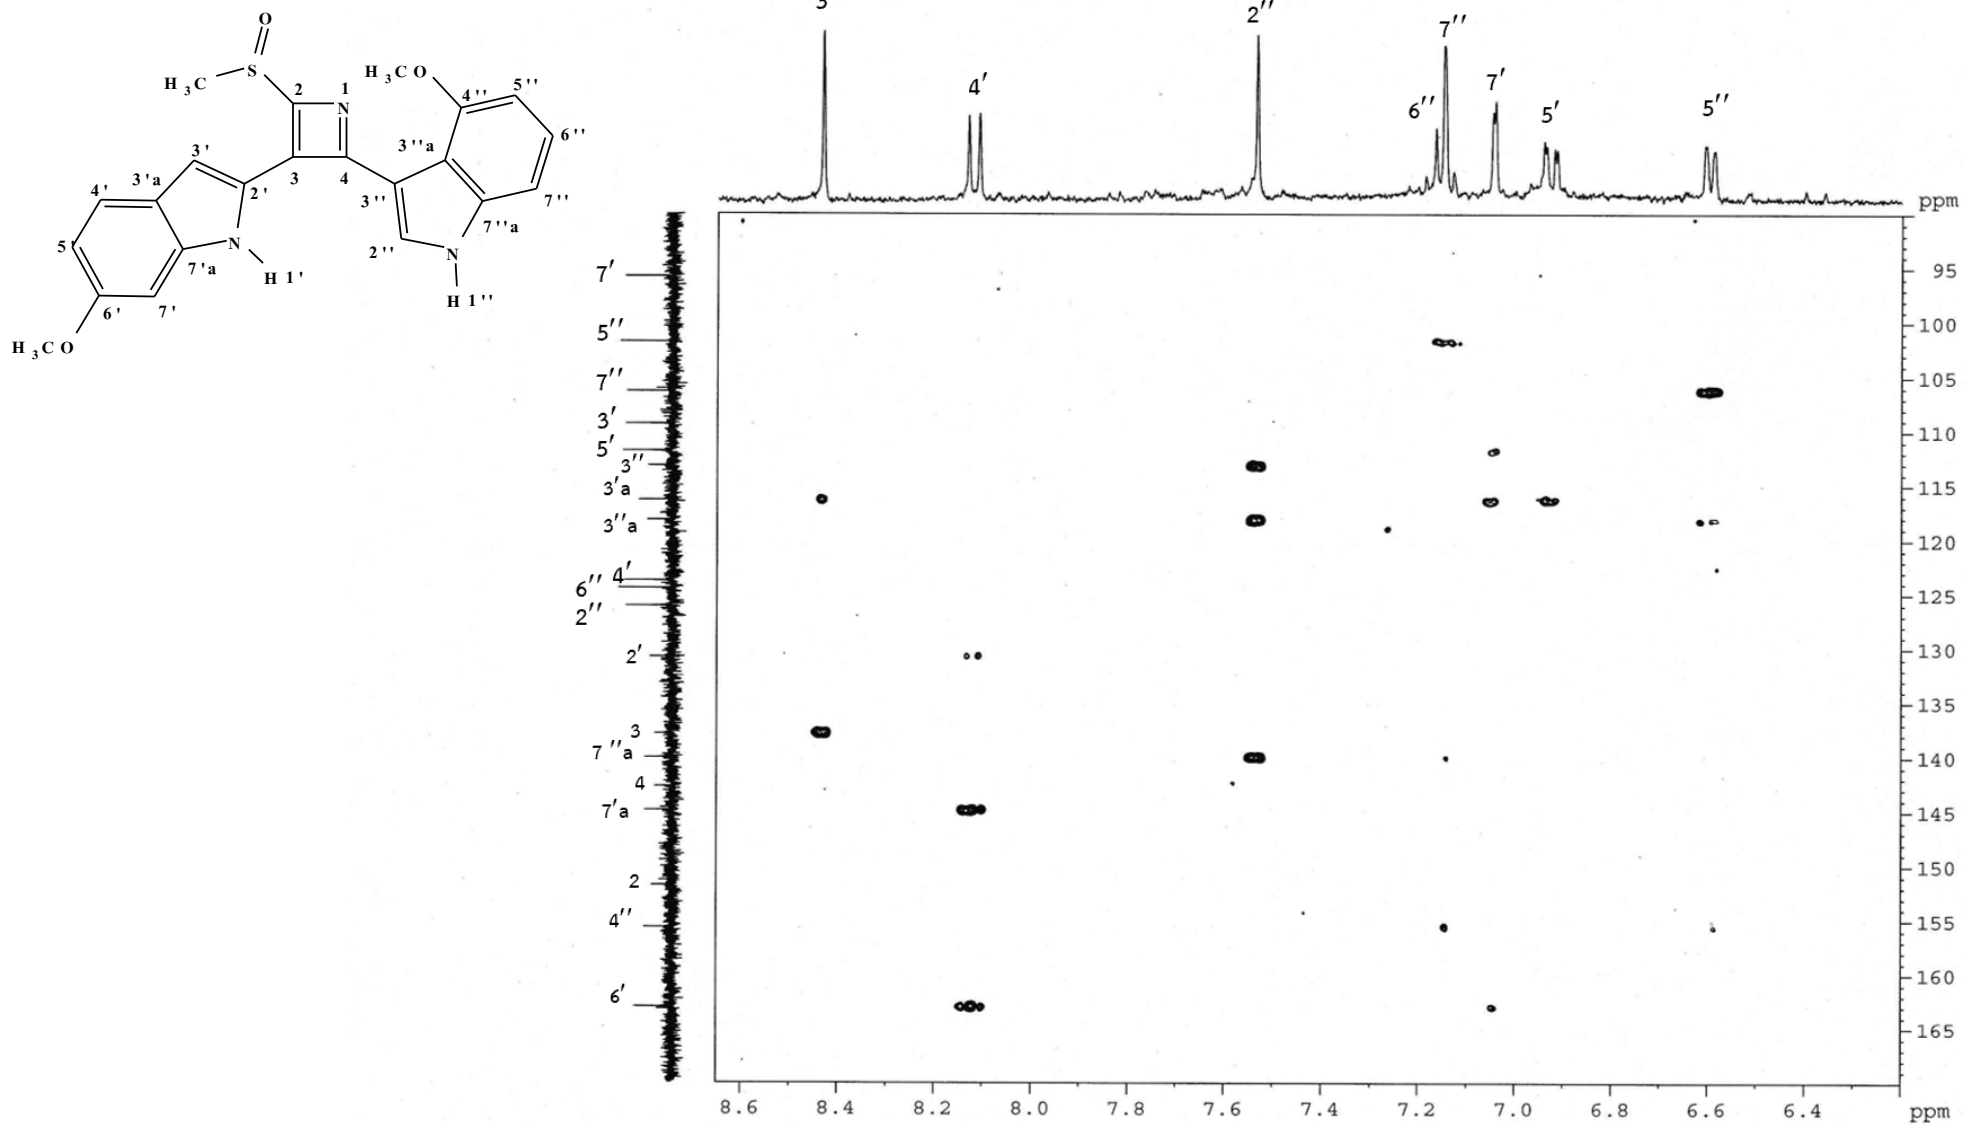

**Figure S79.** The HMBC spectrum of compound **7**

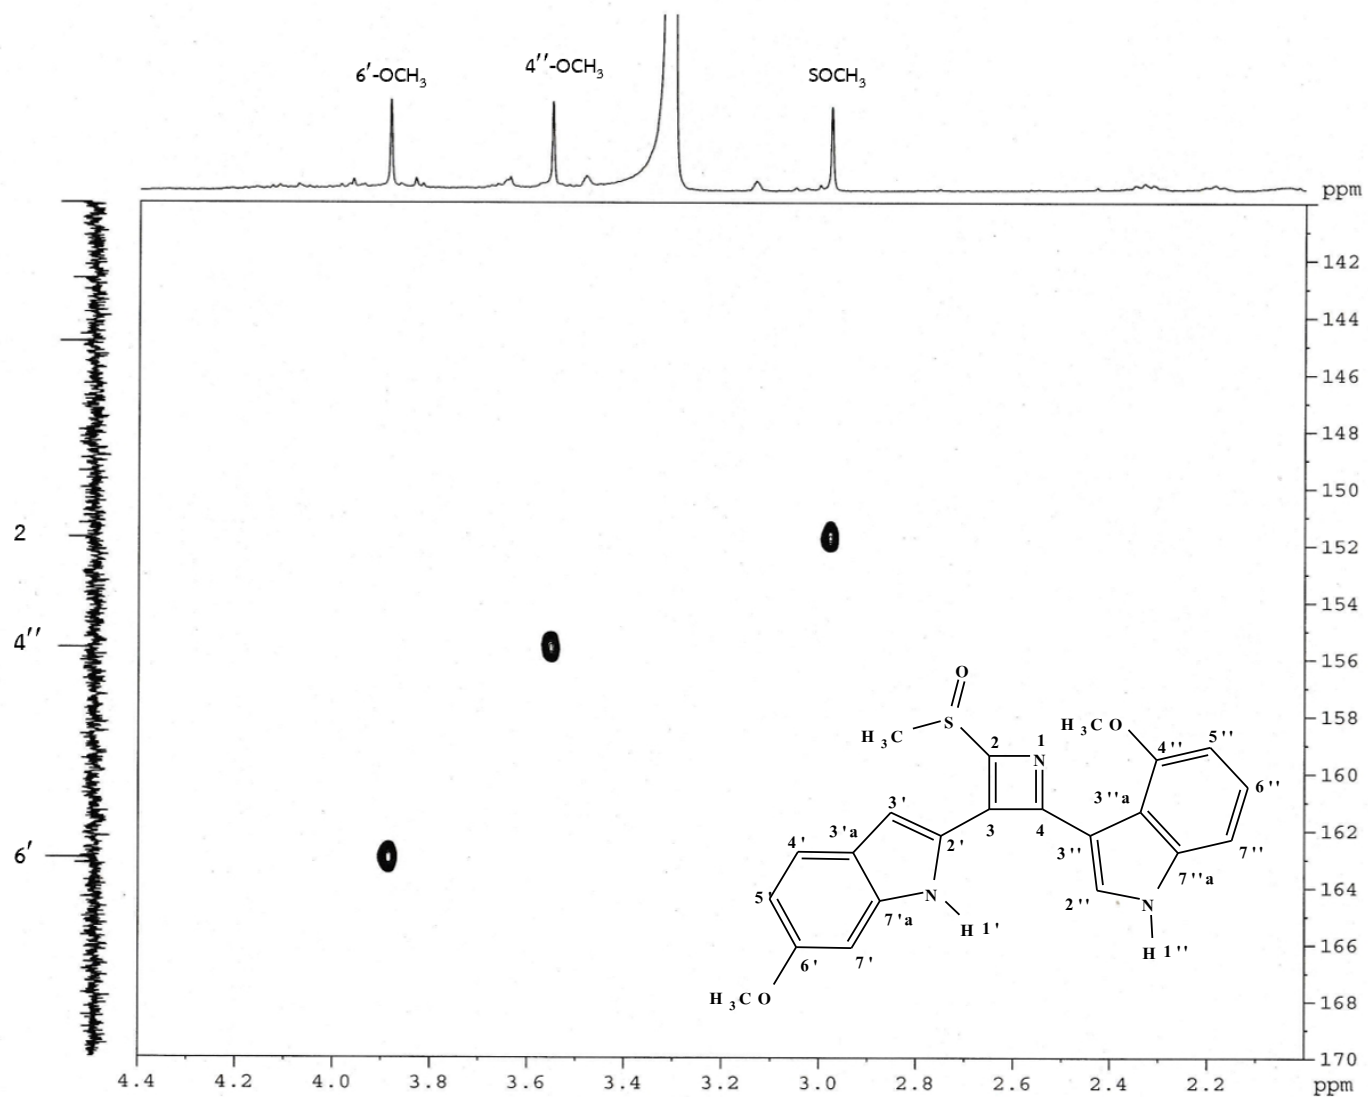

**Figure S80.** The HMBC spectrum of compound **7** (continued)

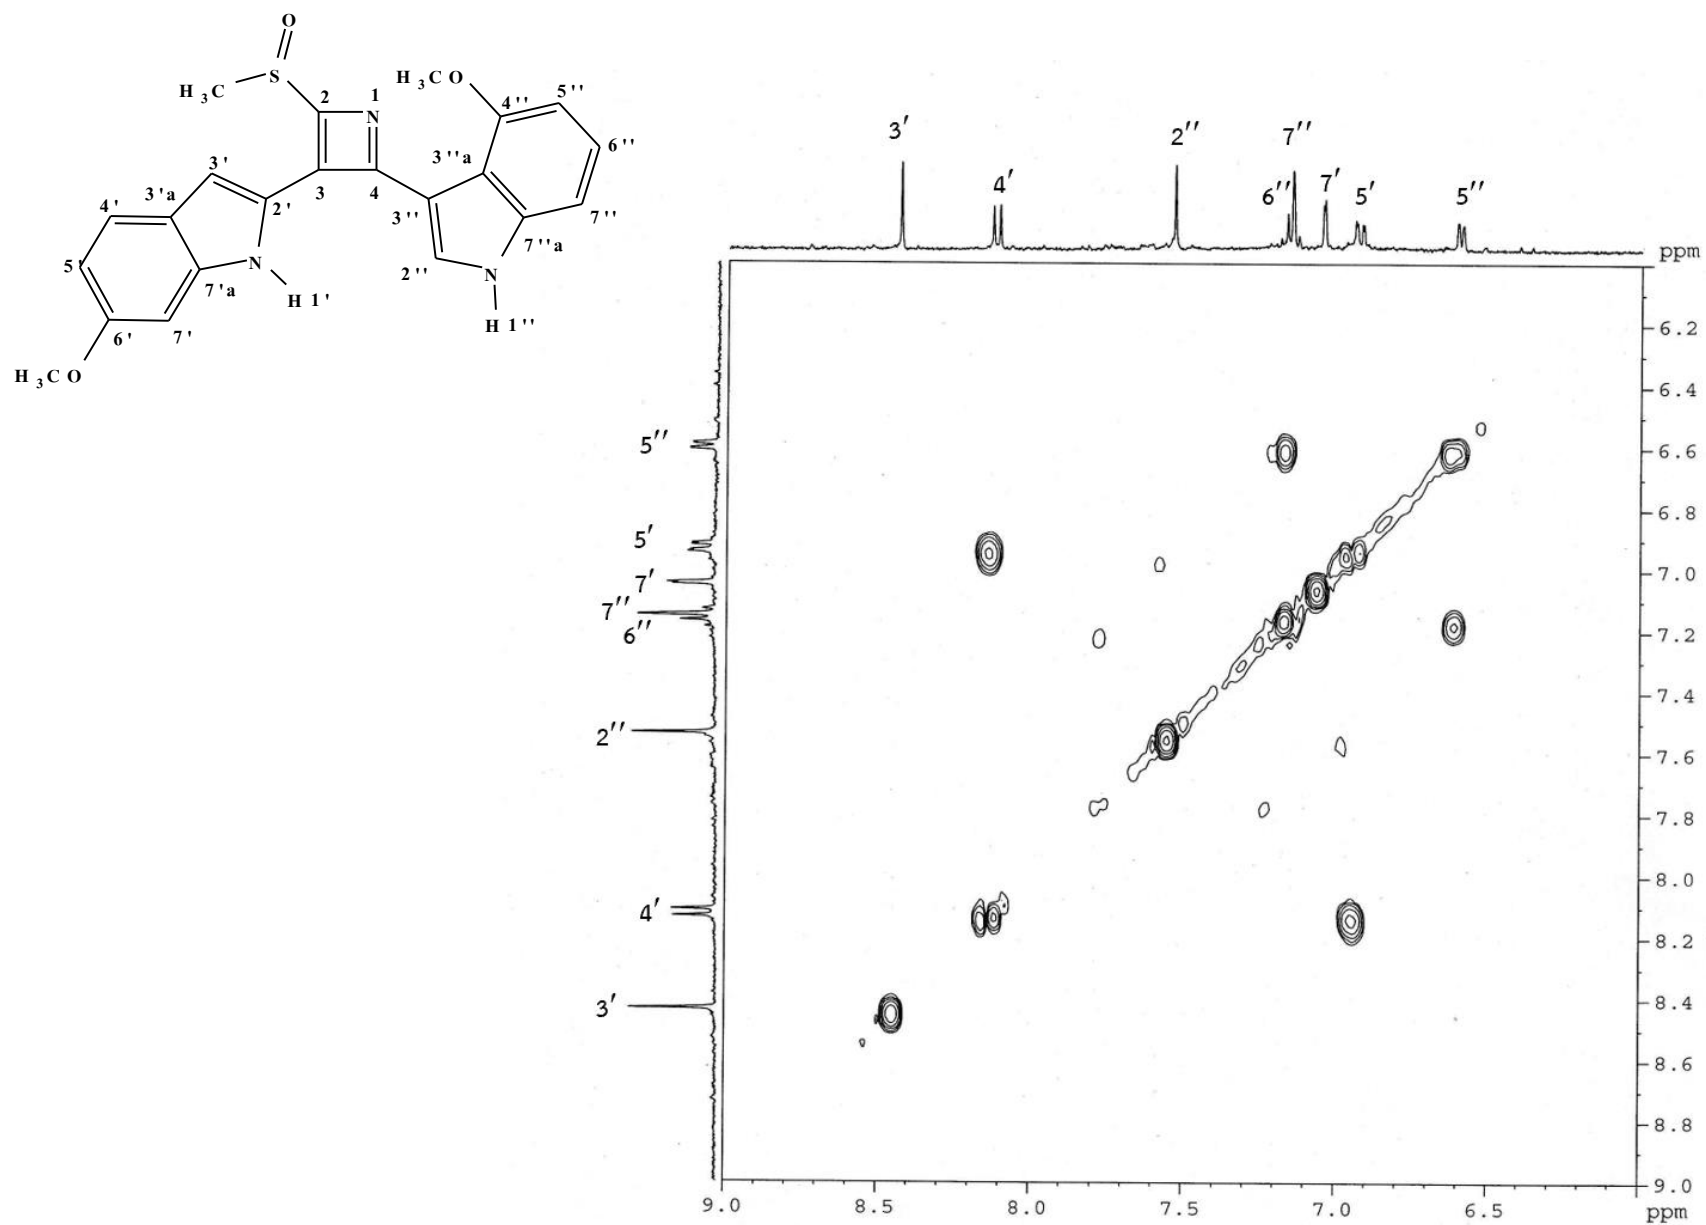

**Figure S81.** The  $^1\text{H}$ - $^1\text{H}$  COSY spectrum of compound **7**

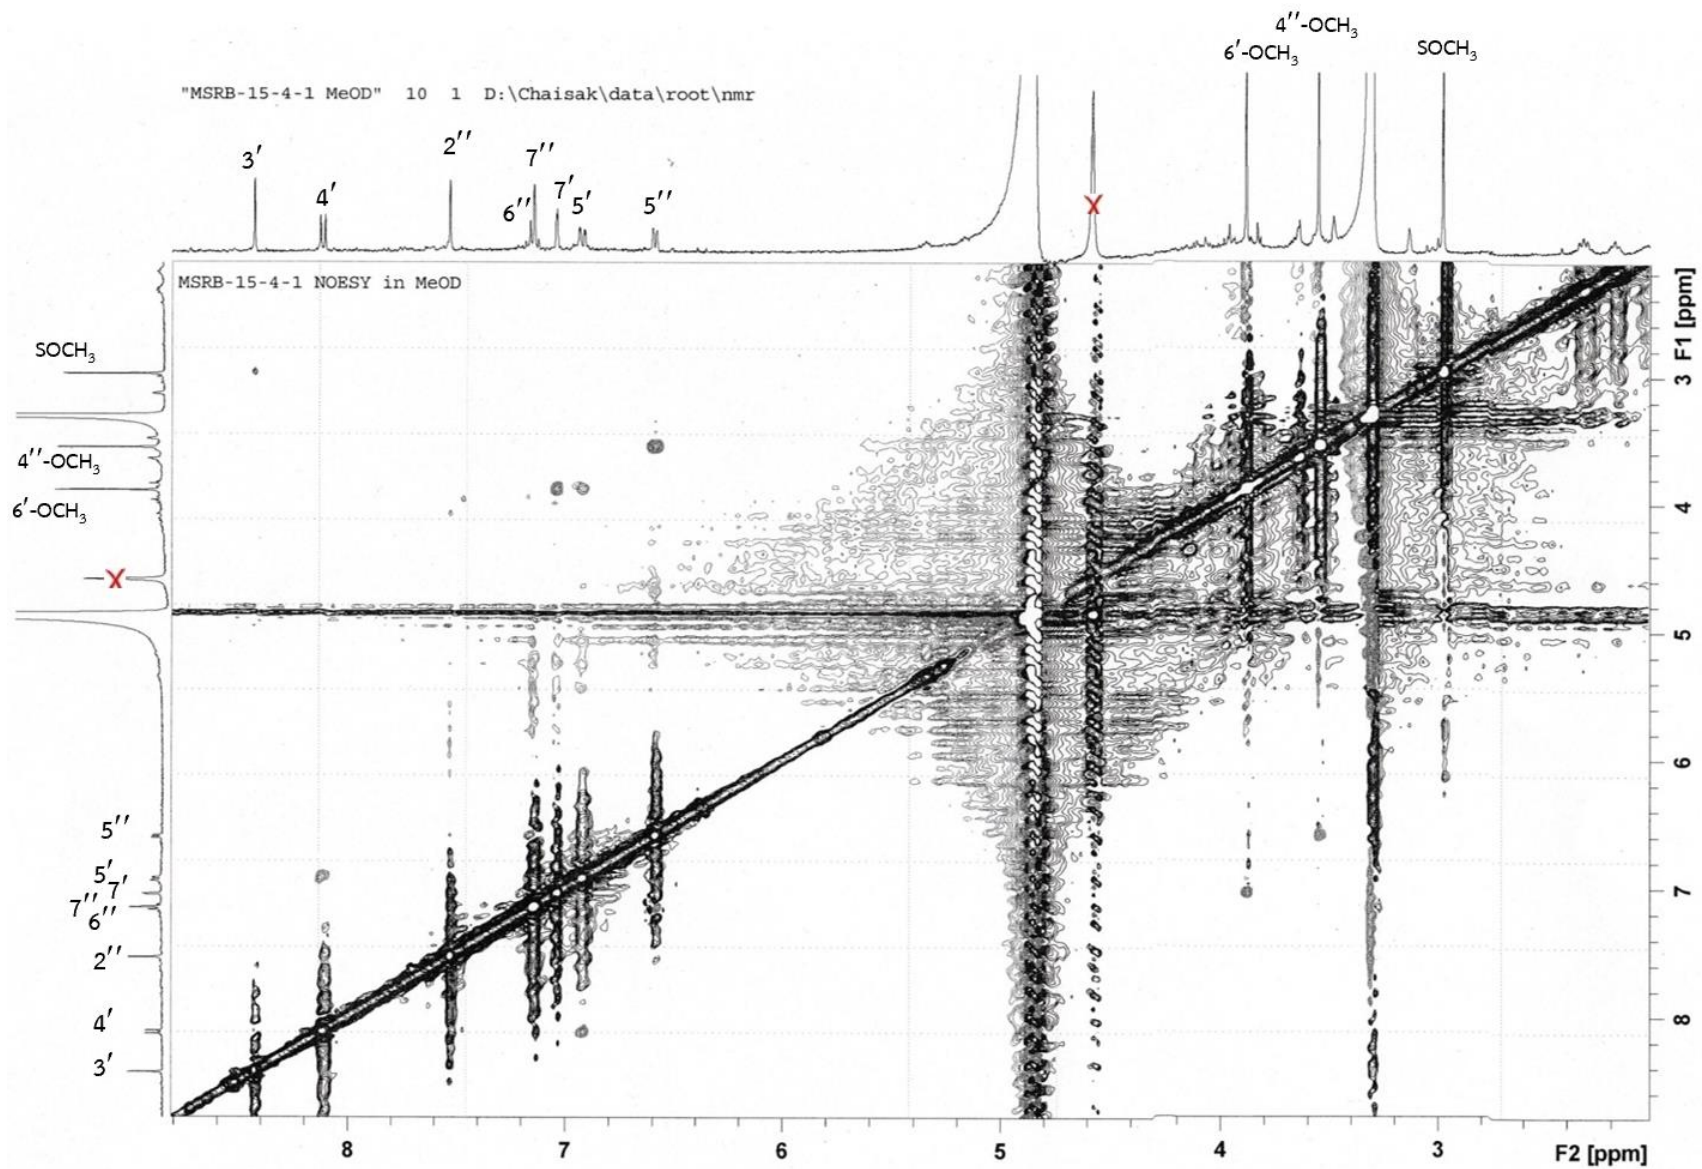

Figure S82. The NOESY spectrum of compound 7

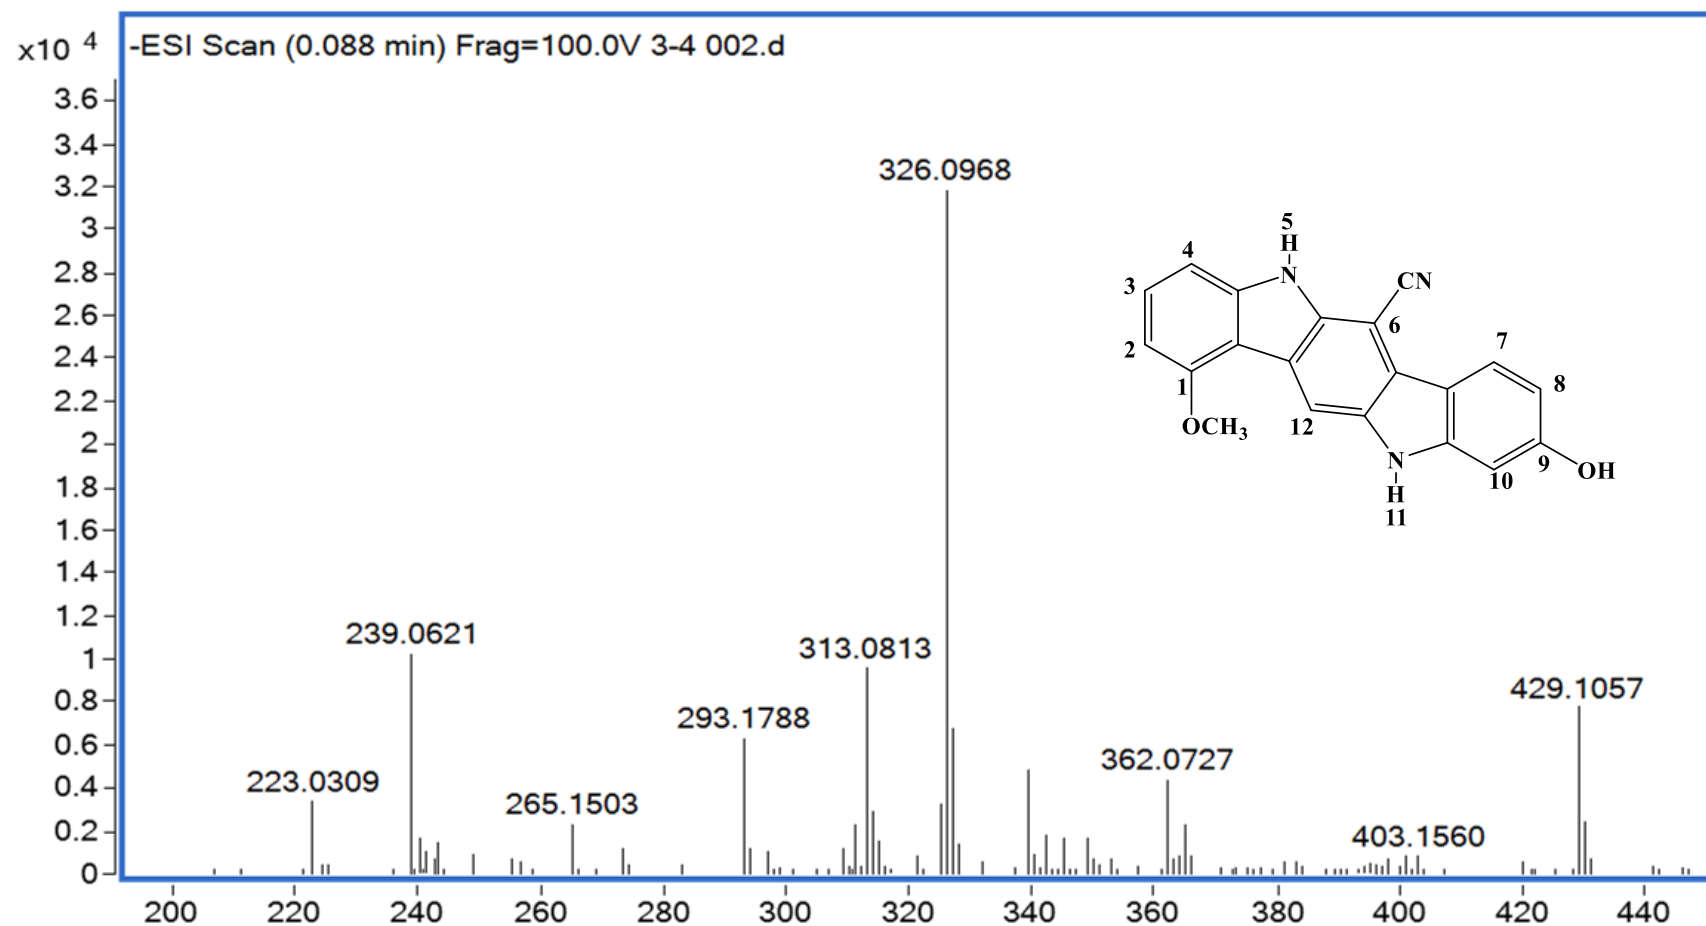

**Figure S83.** The HR-ESI-MS spectrum of compound **8**

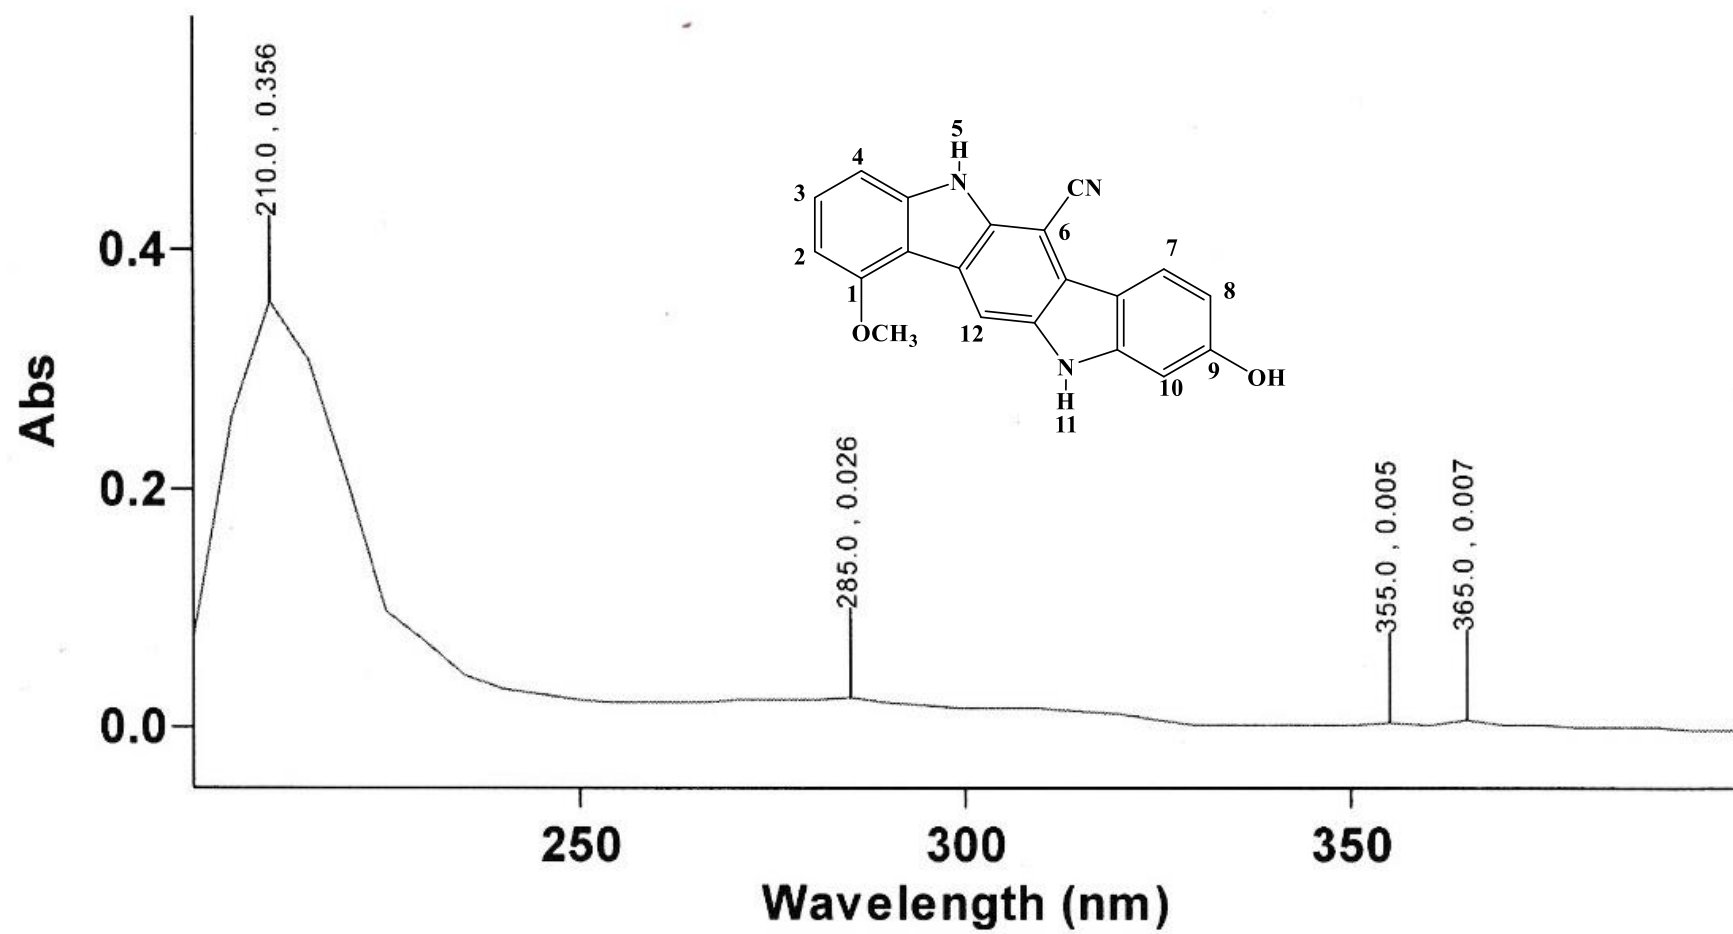

**Figure S84.** The UV spectrum of compound 8



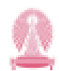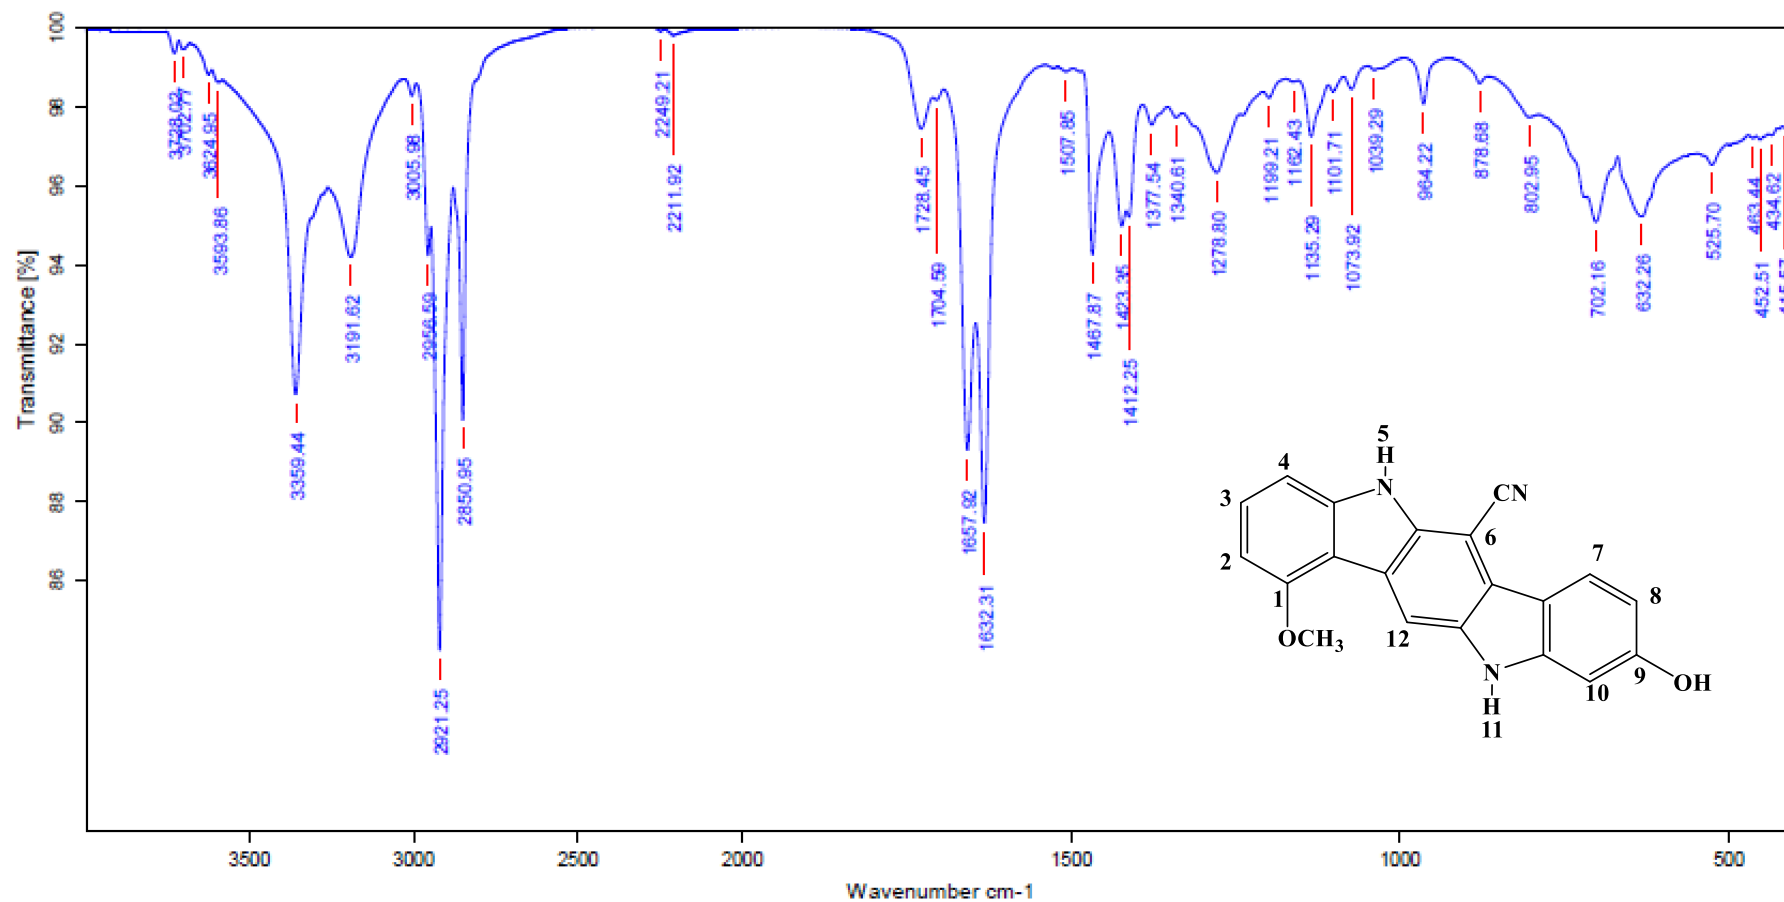

Figure S85. The IR spectrum of compound **8** (ATR)

MSRB-3-4  $^1\text{H}$ -NMR (400 MHz) acetone- $d_6$

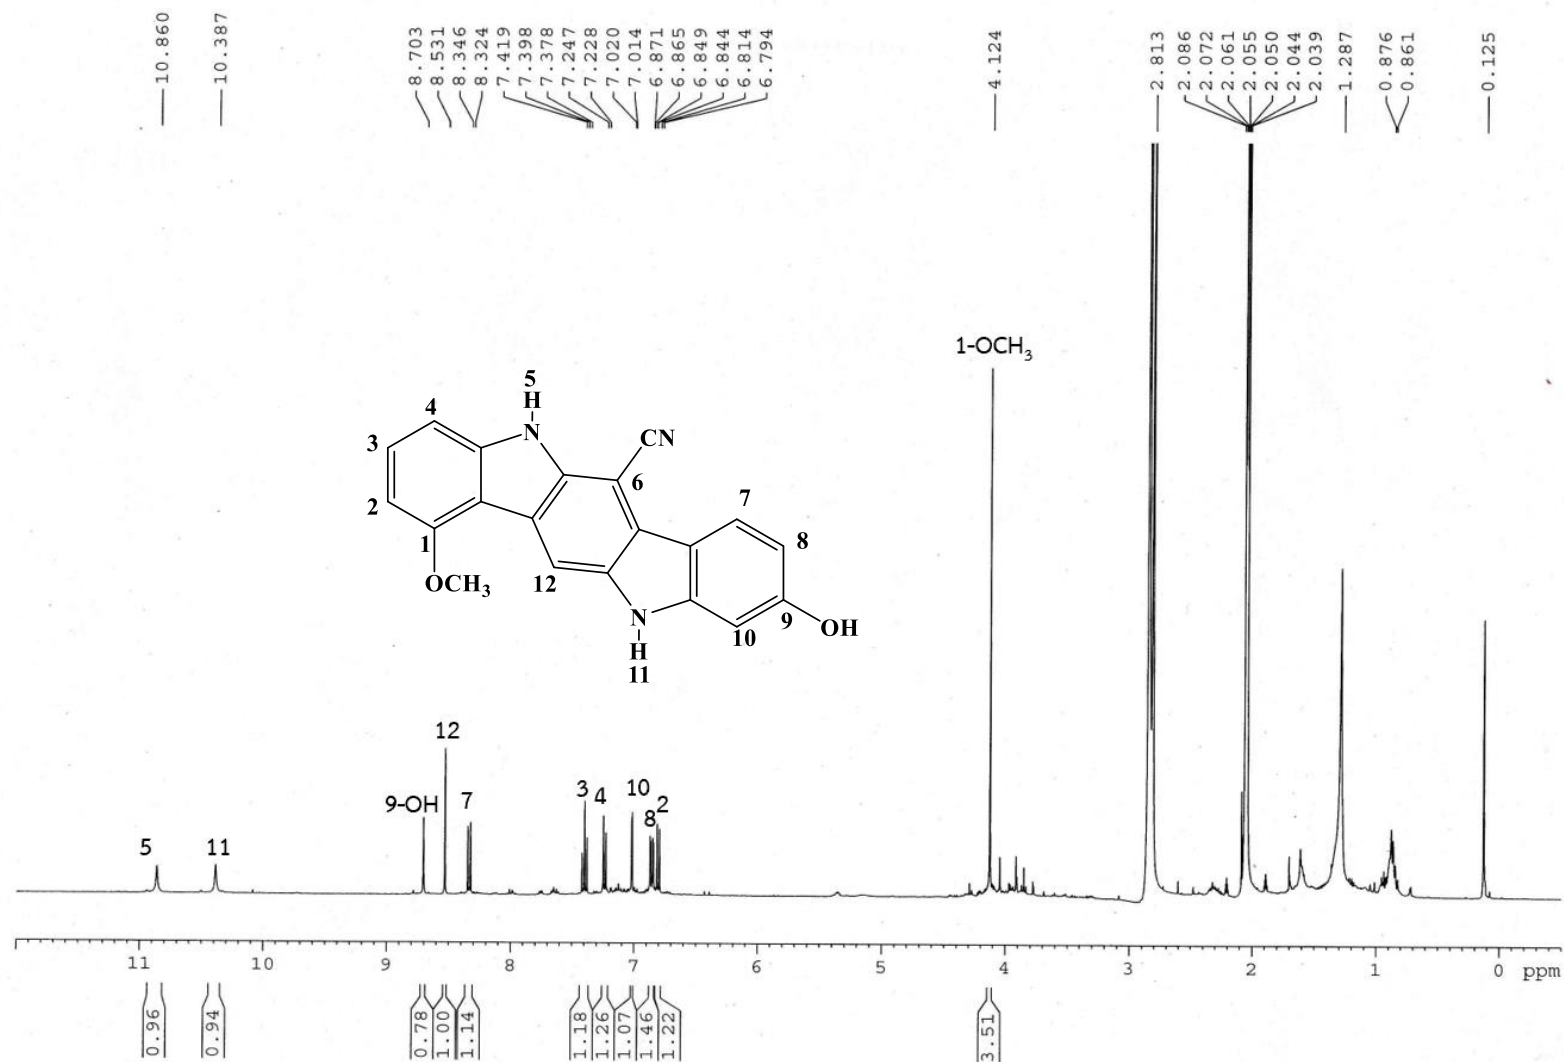

**Figure S86.** The  $^1\text{H}$  NMR (400 MHz, acetone- $d_6$ ) spectrum of compound **8**

MSRB-3-4 1H-NMR (400 MHz) acetone-d6

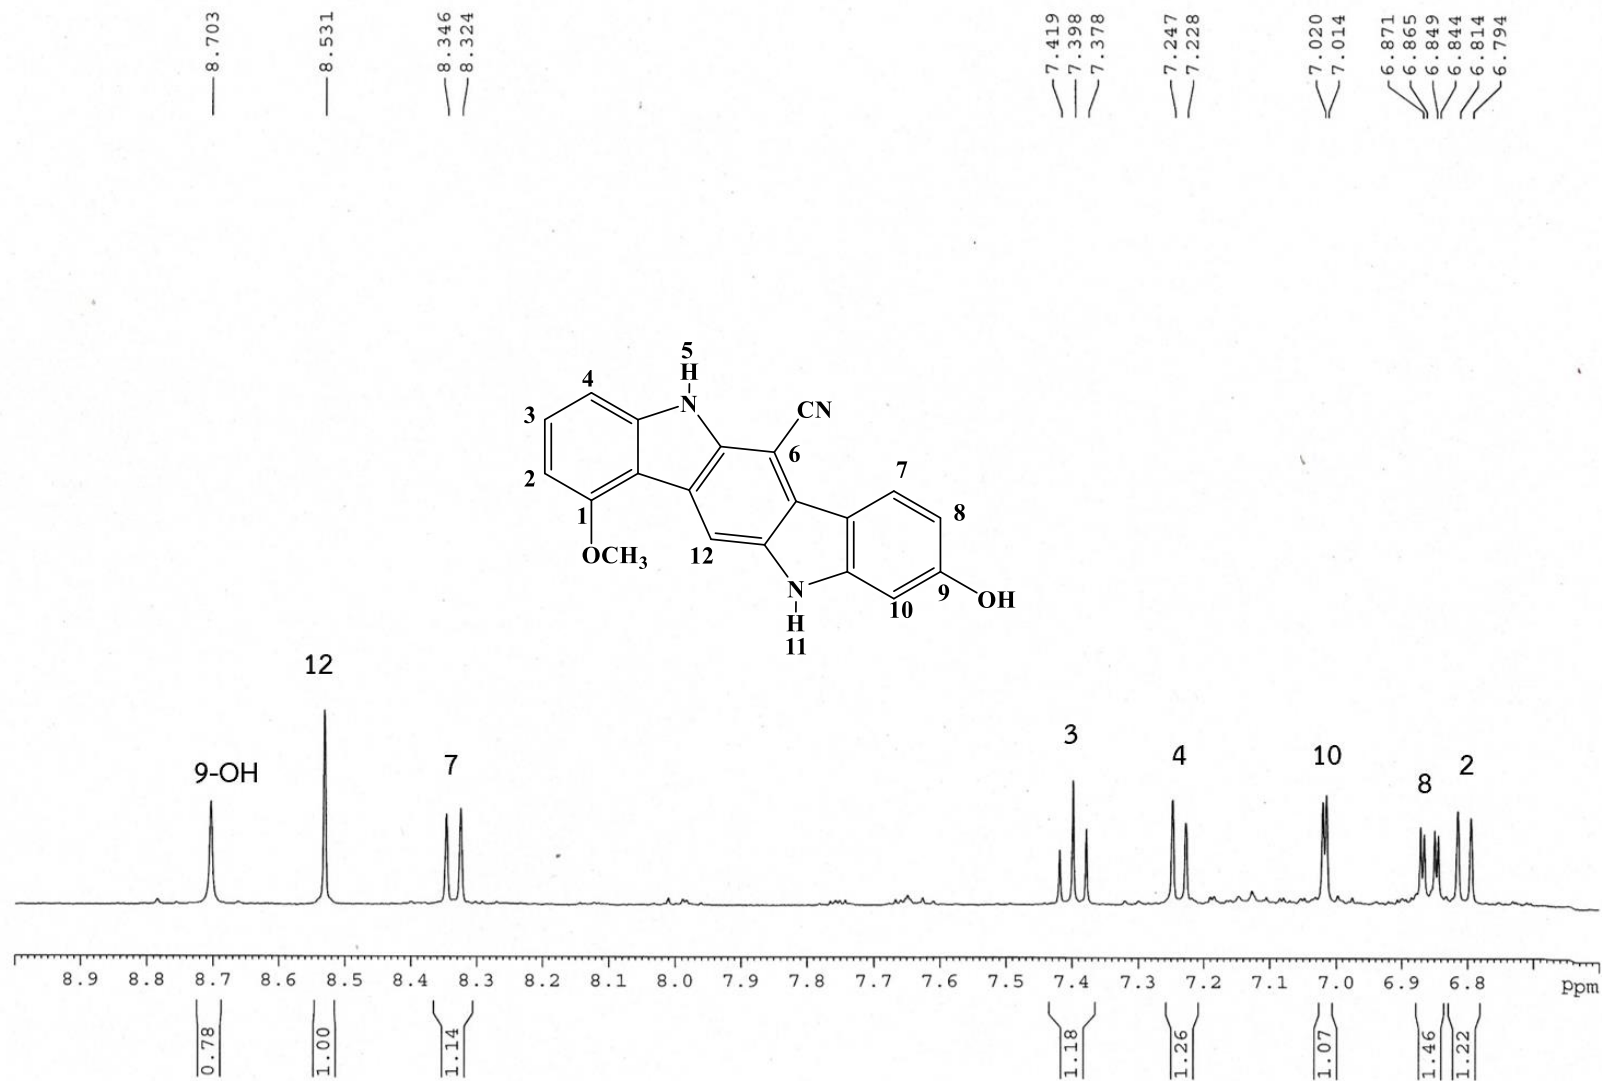

**Figure S87.** The <sup>1</sup>H NMR (400 MHz, acetone-d<sub>6</sub>) spectrum of compound **8** (continued)

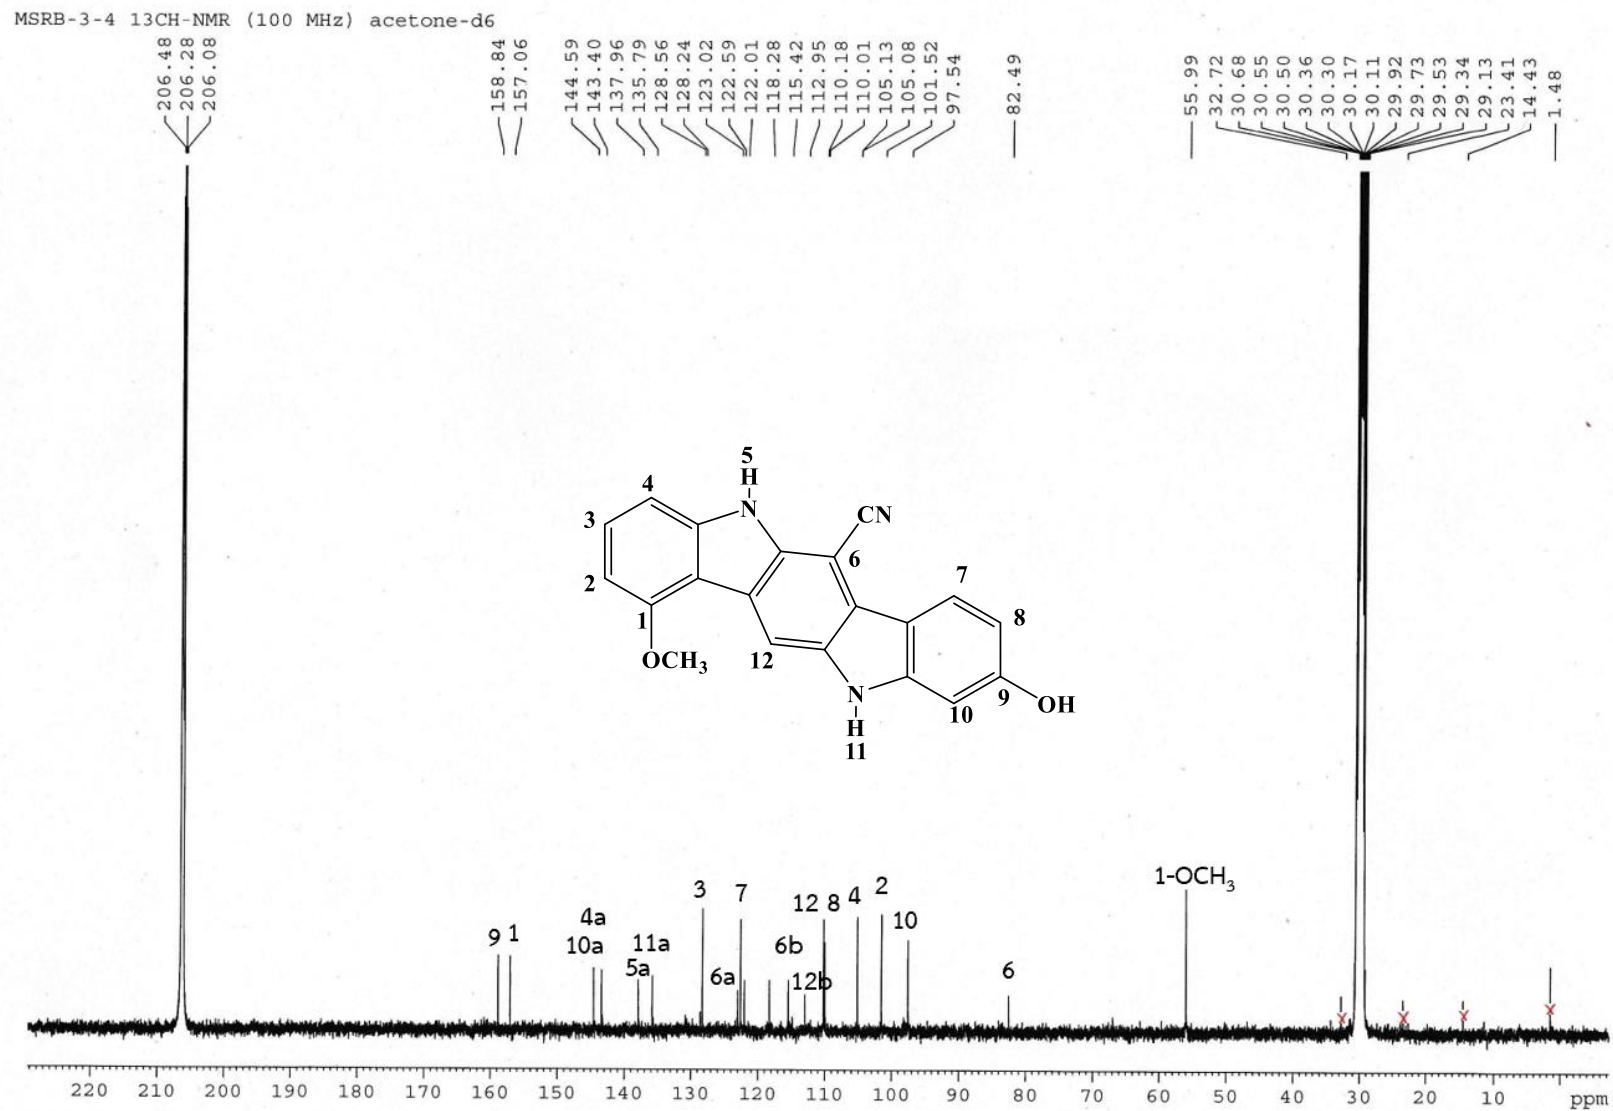

**Figure S88.** The  $^{13}\text{C}$  NMR (100 MHz, acetone- $d_6$ ) spectrum of compound **8**

MSRB-3-4  $^{13}\text{C}$ -NMR (100 MHz) acetone- $d_6$

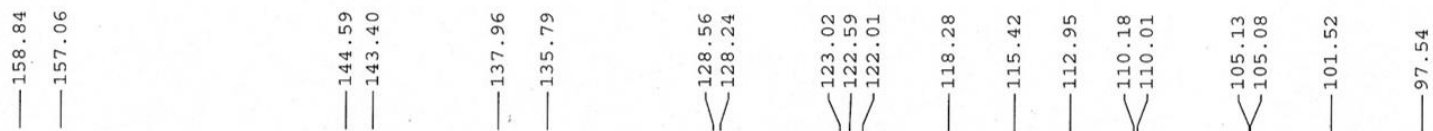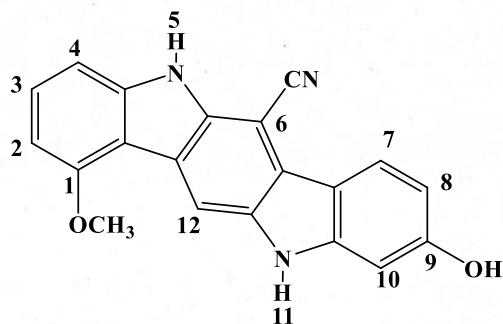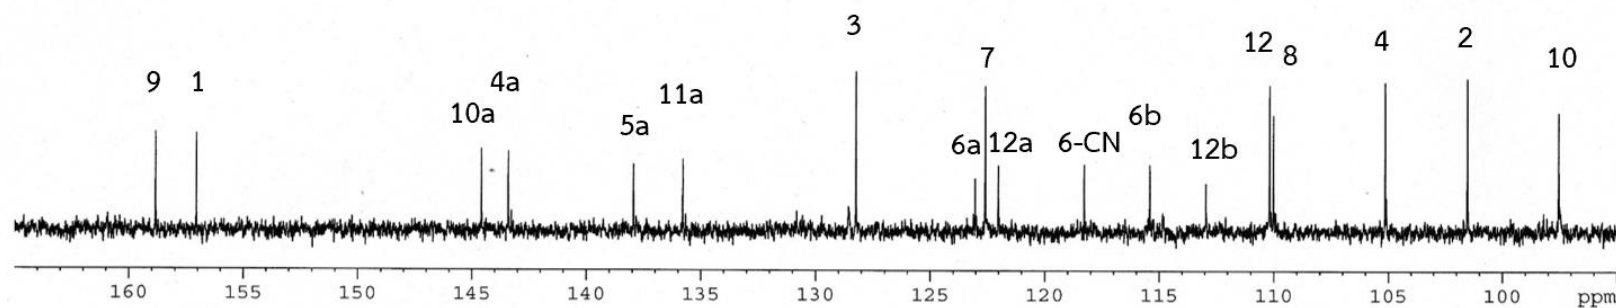

**Figure S89.** The  $^{13}\text{C}$  NMR (100 MHz, acetone- $d_6$ ) spectrum of compound **8** (continued)

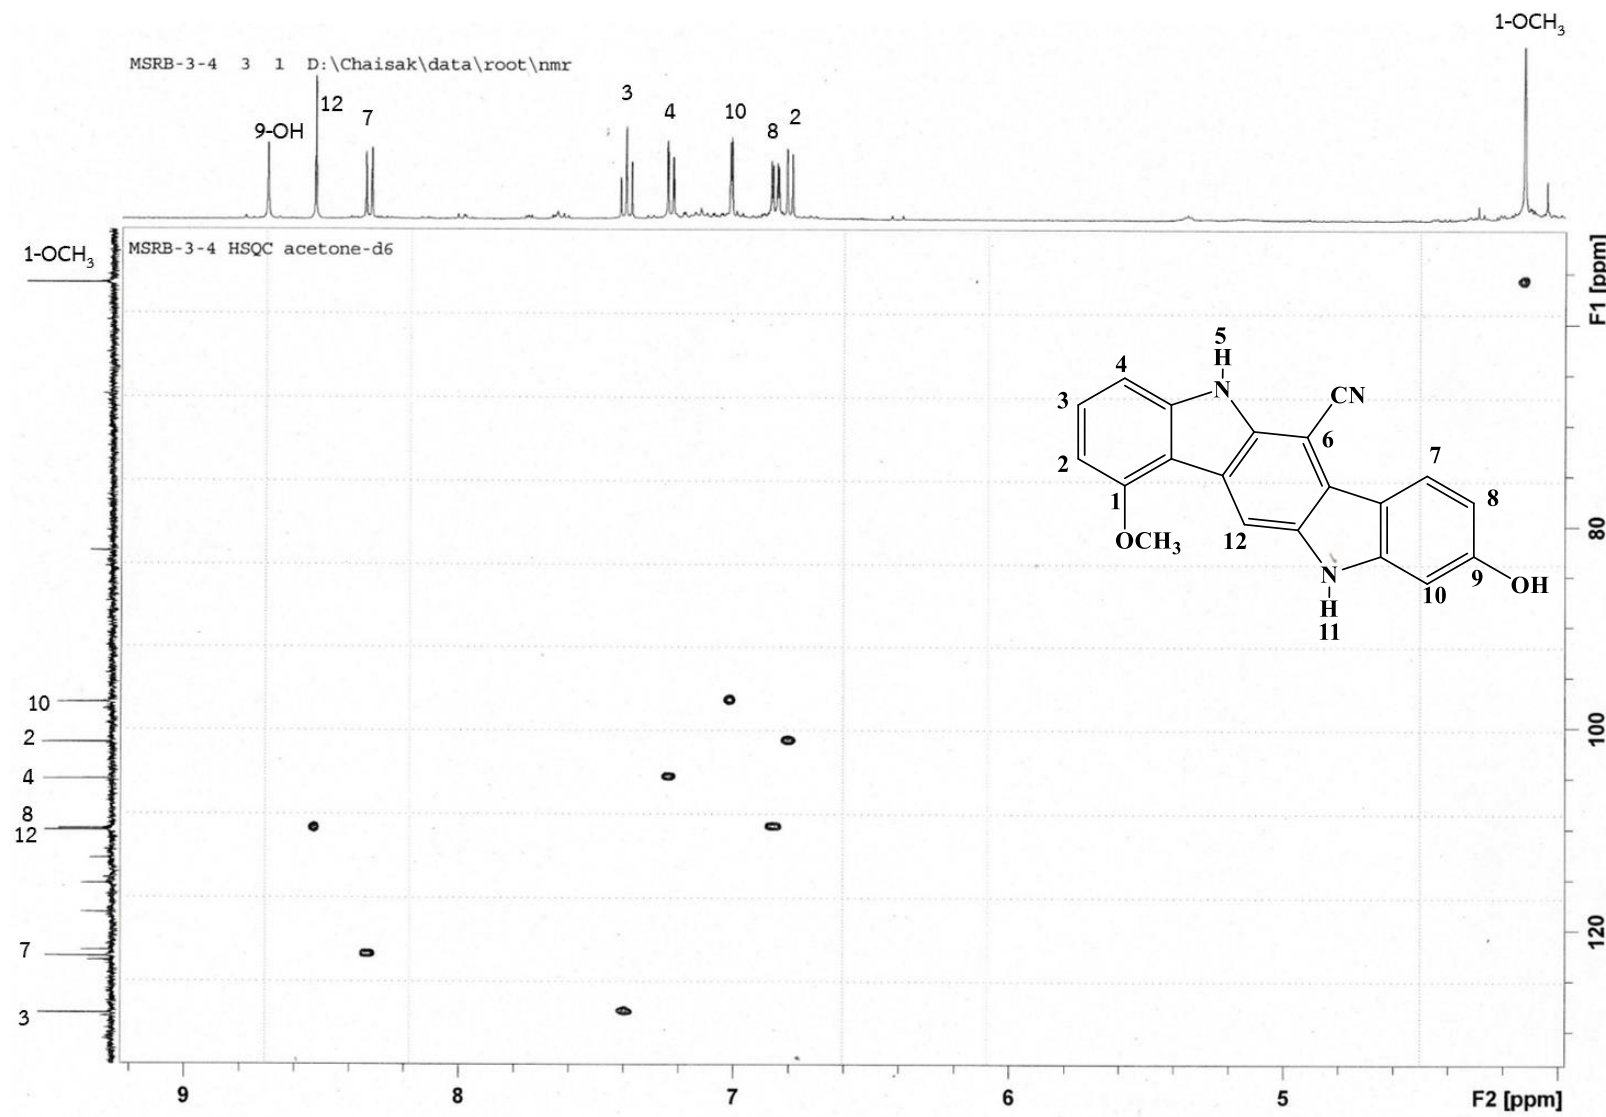

**Figure S90.** The HSQC spectrum of compound **8**

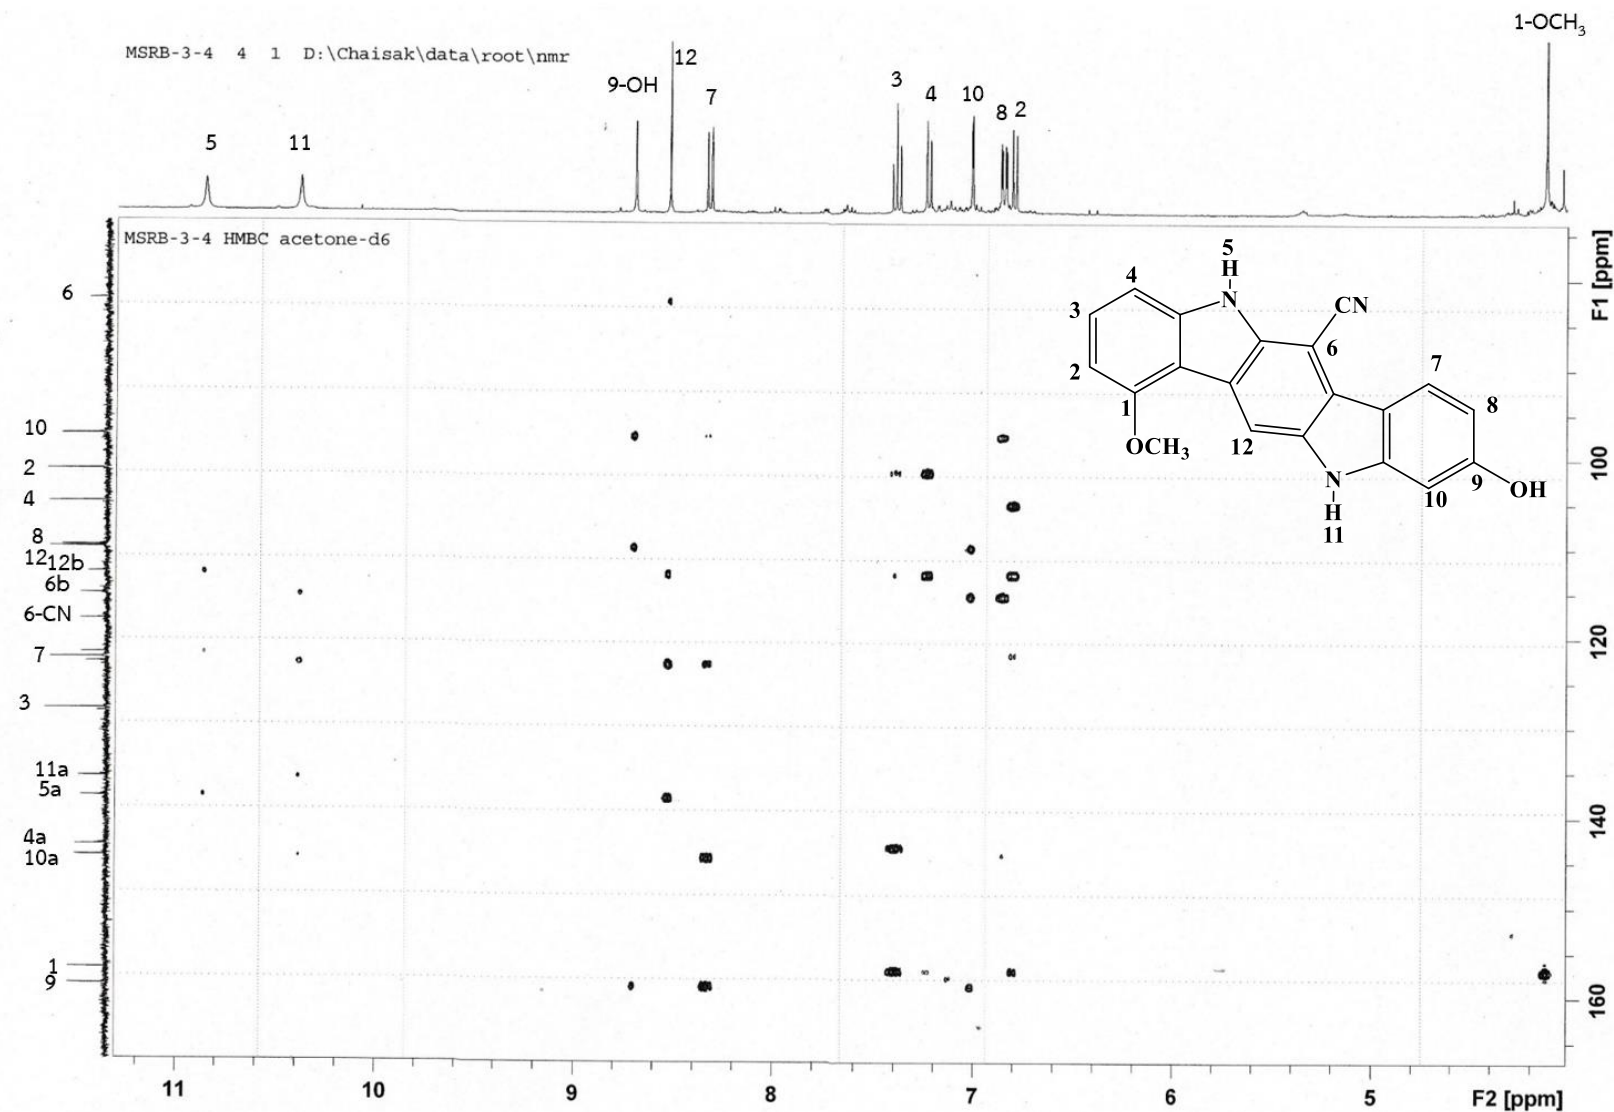

**Figure S91.** The HMBC spectrum of compound **8**

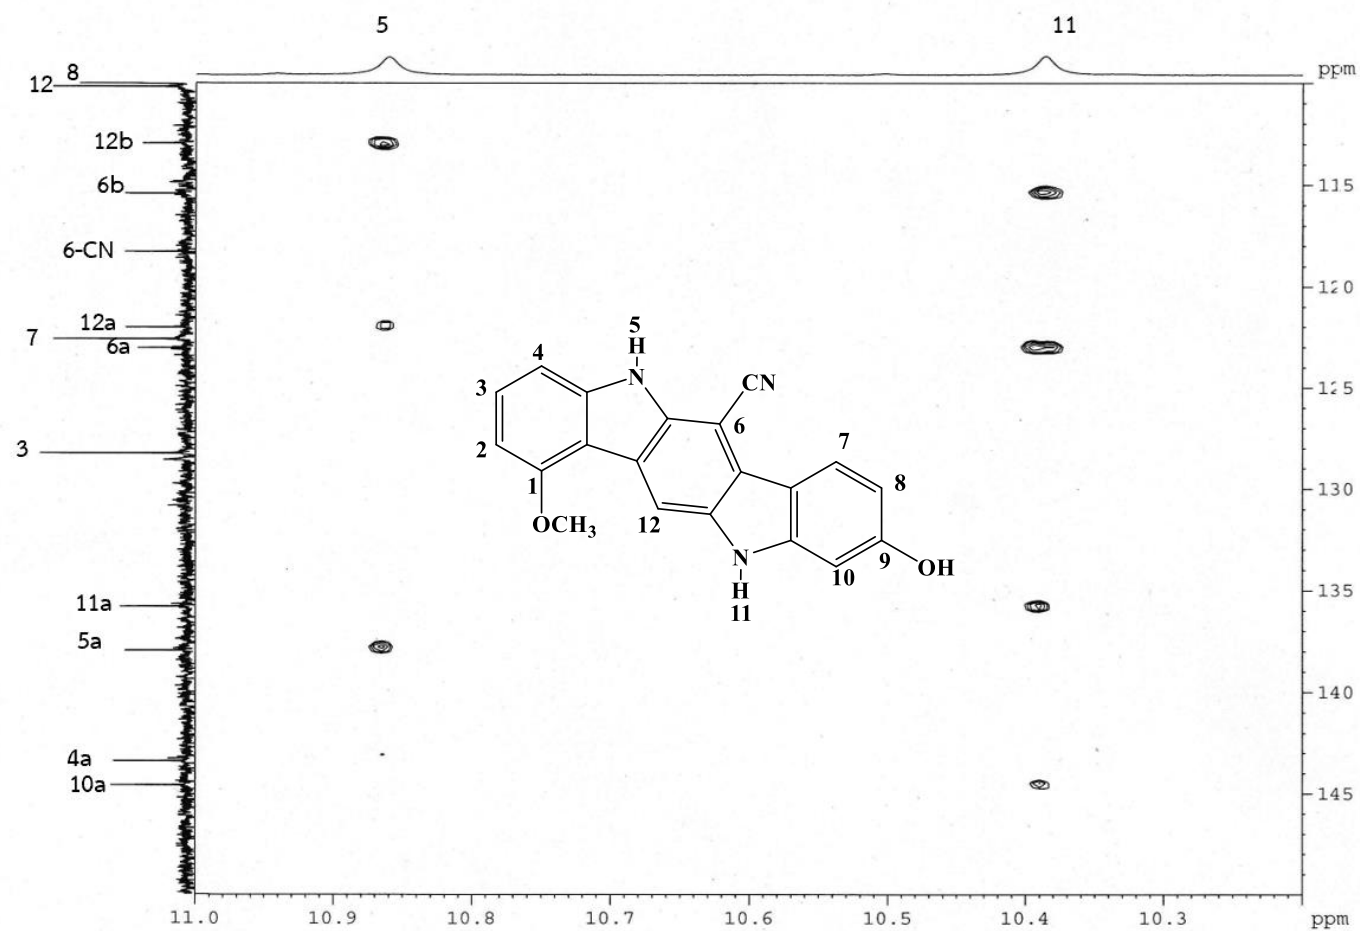

**Figure S92.** The HMBC spectrum of compound **8** (continued)



MSRB-3-4 HMBC acetone-d6

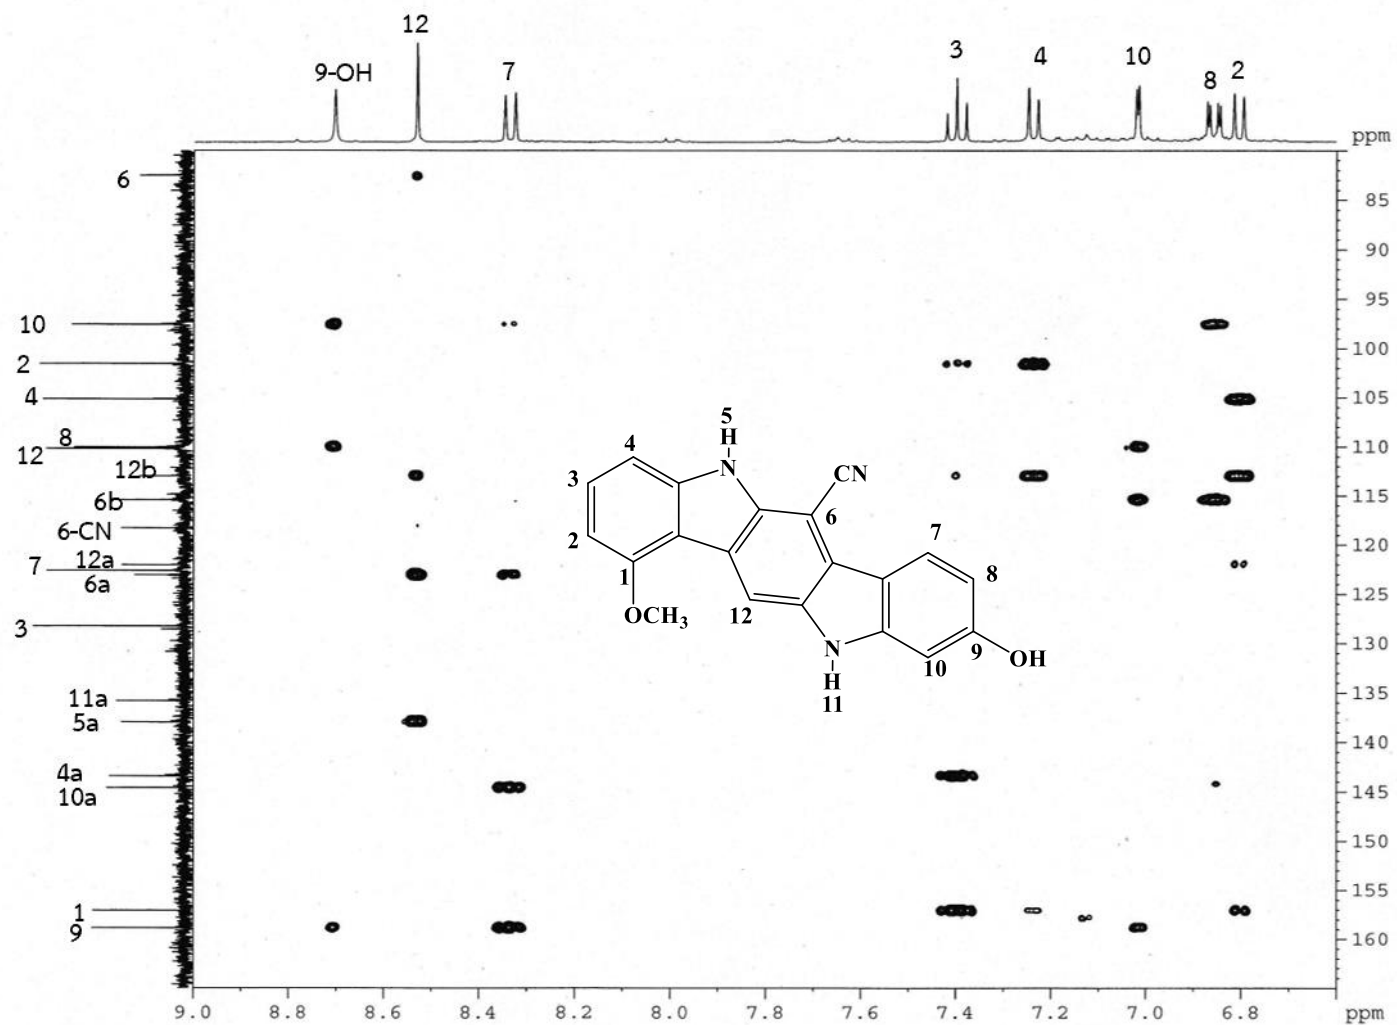

**Figure S93.** The HMBC spectrum of compound **8** (continued)

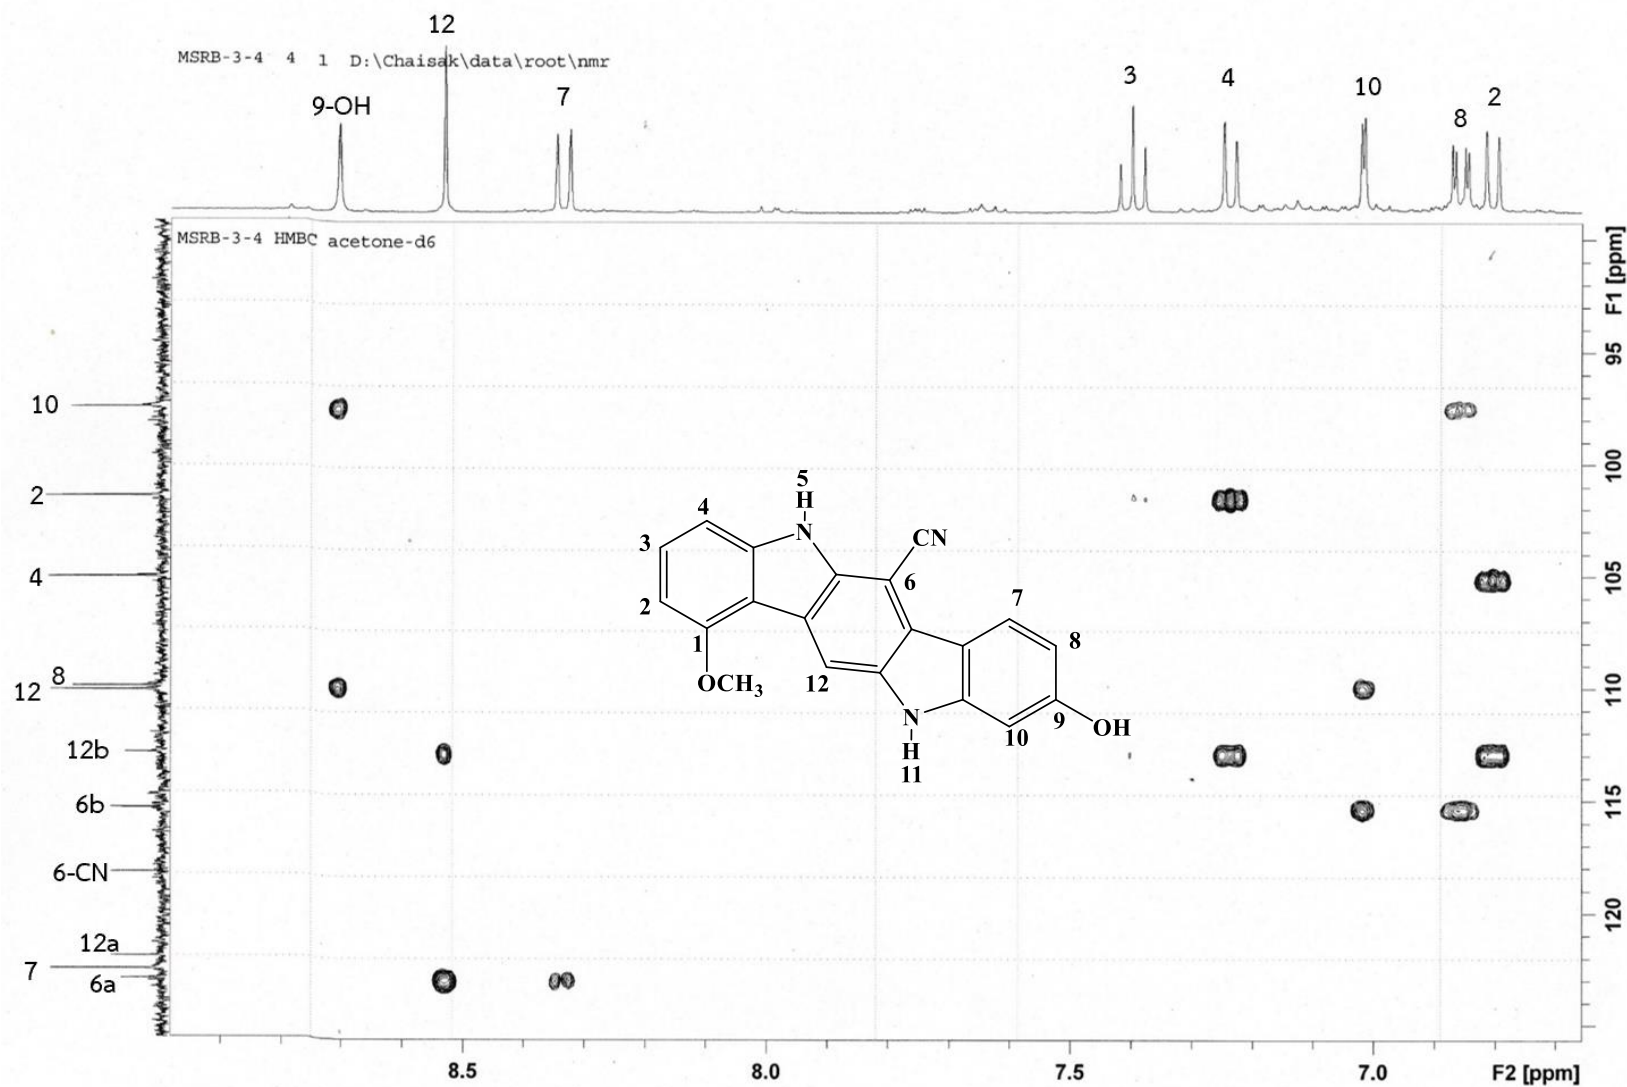

**Figure S94.** The HMBC spectrum of compound **8** (continued)

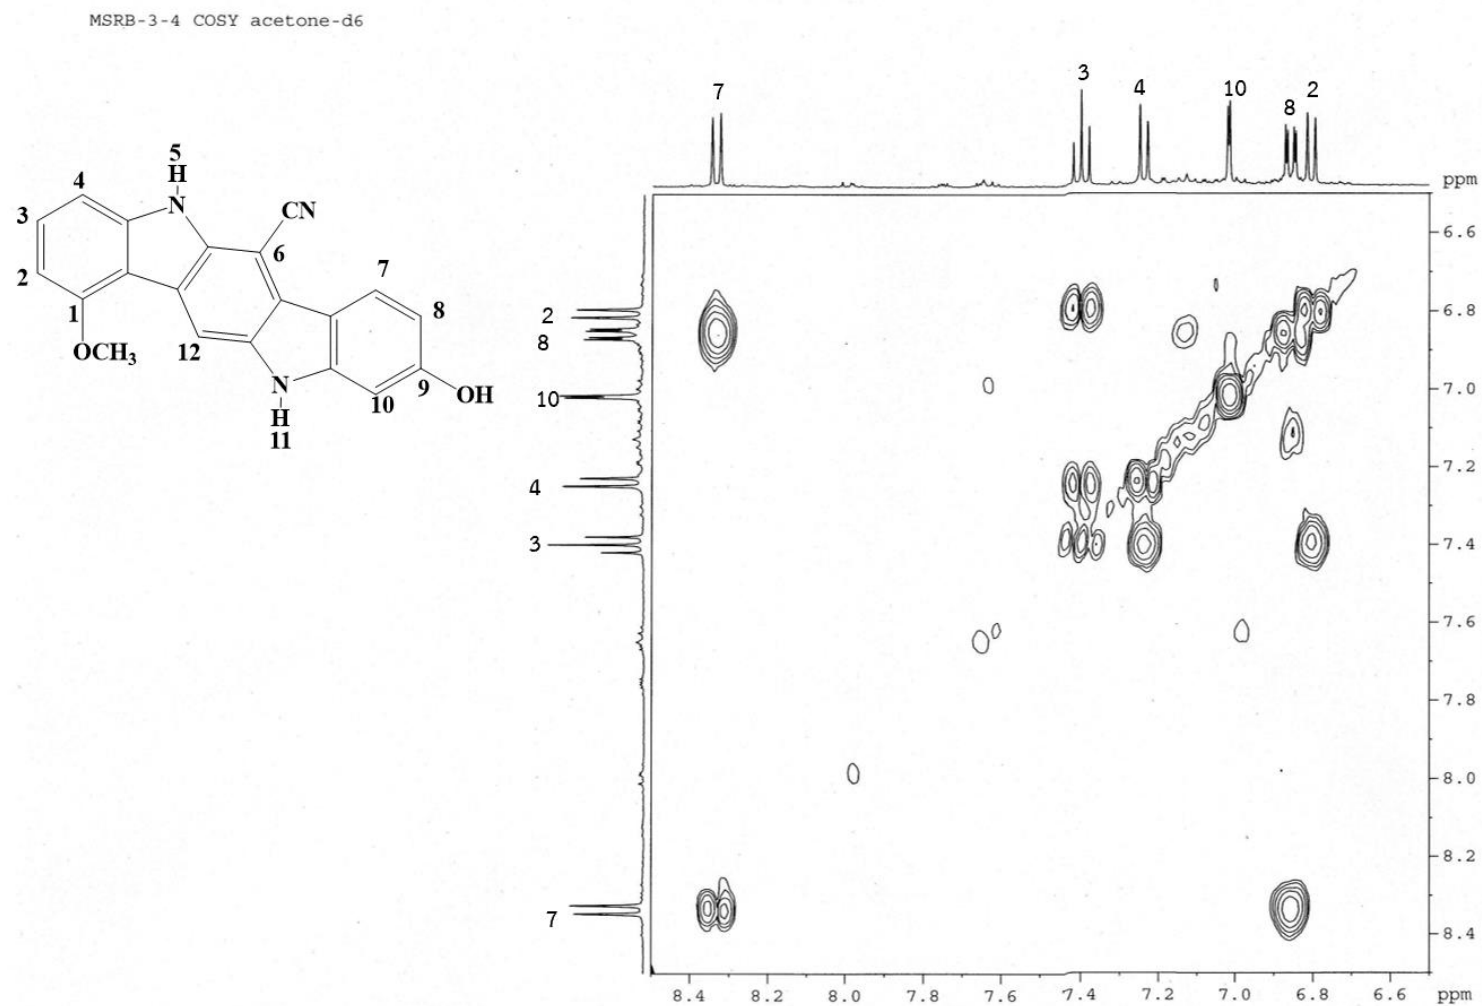

**Figure S95.** The <sup>1</sup>H-<sup>1</sup>H COSY spectrum of compound **8**



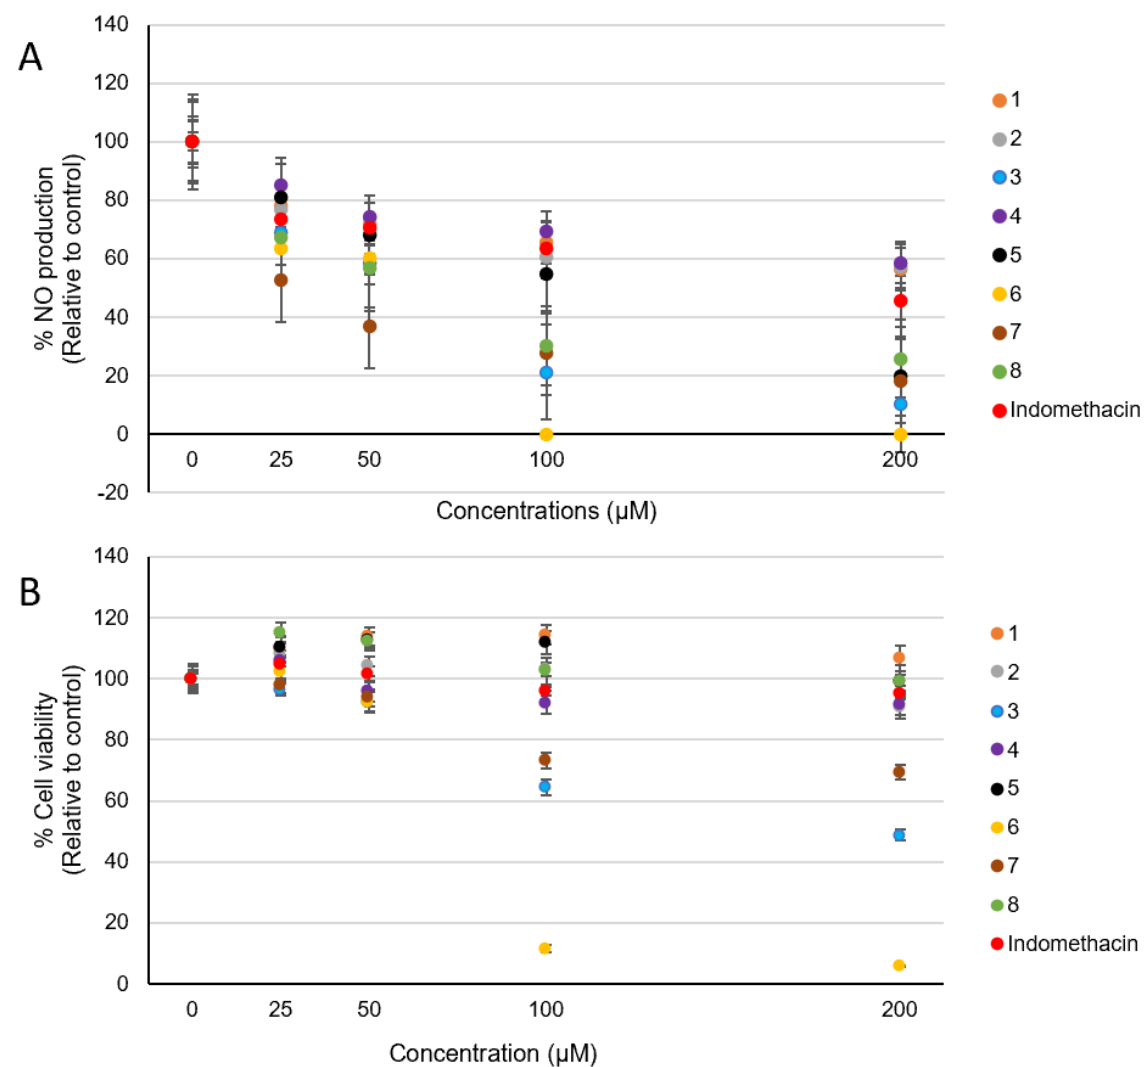

**Figure S97.** Effects of compounds isolated from *M. siamensis* roots against LPS-induced nitric oxide production in RAW 264.7 cells. (A) Nitric oxide production, and (B) cell viability were measured using Griess reagent kit and MTT assay ( $n = 3$ ), respectively. Cells were treated with compounds at the indicated concentration for 24 h before exposure to 100 ng/mL LPS. Indomethacin was used as a positive control.

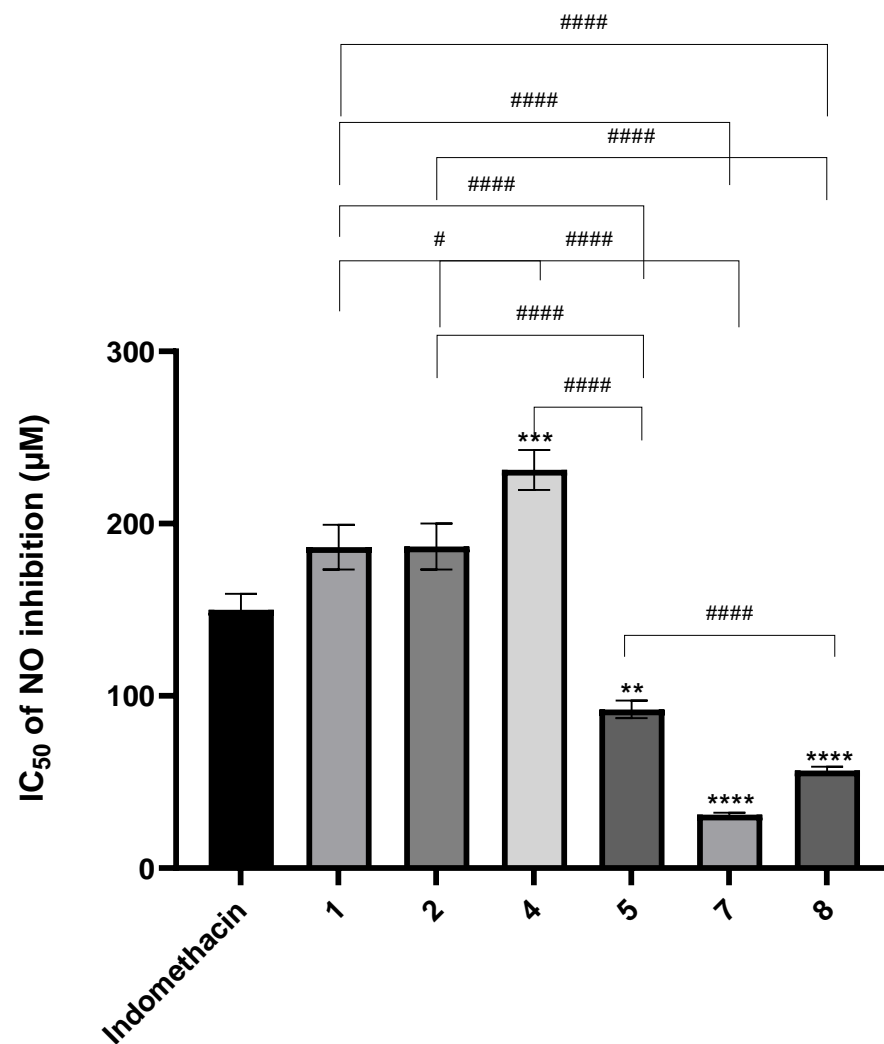

**Figure S98.** The IC<sub>50</sub> values of compound isolated from *M. siamensis* roots against LPS-induced nitric oxide production in RAW 264.7 cells. The differences between means of the individual groups were analyzed using one-way analysis of variance (ANOVA) via GraphPad Prism 9.3.1 software (San Diego, CA, USA). \*\*P< 0.005, \*\*\*p<0.001, \*\*\*\*p<0.0001 versus Indomethacin. #P<0.05, \*\*\*\*p<0.0001 between group
